# Supplementary material for: Structural basis for sequence-specific recognition of guide and target strands by the Archaeoglobus fulgidus Argonaute protein
Source: Research Square preprint supplement (doi:10.21203/rs.3.rs-2305454/v1), 2022-11-26
Supplement: Supplementary file 1 [file d6b34282599aed8ca975754e.xlsx]

## Sheet: Counts_summary
		Sample			Sample
		Af1318			Af1318
	Total count of aligned reads	4006921		Total count of aligned reads	4006921
				Aligned reads, %
	E. coli genome	639706		E. coli genome	15.97
	pETDuet-1 plasmid	1719221		pETDuet-1 plasmid	42.91
	Af1318	611314		Af1318	15.26
	Af1317	320563		Af1317	8
	f1 ori	42407		f1 ori	1.06
	AmpR	157749		AmpR	3.94
	ColE1 ori	45582		ColE1 ori	1.14
	ROP	3680		ROP	0.09
	lacI	71647		lacI	1.79

## Sheet: Af1318
#chrom	st	end	accession	mRNA_size	gene_strand	Frag_count	FPM	FPKM
pETDuet-1_NHis-Af1318_Af1317-CStrepII_TS	3314	4175	Translation	1	0	4195	1778.35	1.77835e+06
pETDuet-1_NHis-Af1318_Af1317-CStrepII_TS	2745	3193	f1	1	0	3662	1552.4	1.5524e+06
pETDuet-1_NHis-Af1318_Af1317-CStrepII_TS	4322	4996	ColE1	1	0	3260	1381.98	1.38198e+06
pETDuet-1_NHis-Af1318_Af1317-CStrepII_TS	6129	7212	Translation	1	0	1105	468.433	468433
pETDuet-1_NHis-Af1318_Af1317-CStrepII_TS	5366	5558	Translation	1	0	643	272.582	272582
pETDuet-1_NHis-Af1318_Af1317-CStrepII_TS	70	1396	Af1318	1326	.	610882	258966	195299
pETDuet-1_NHis-Af1318_Af1317-CStrepII_TS	1565	2627	Af1317	1062	.	320528	135879	127946
pETDuet-1_NHis-Af1318_Af1317-CStrepII_TS	3314	4175	AmpR	861	.	157683	66845.2	77636.7
pETDuet-1_NHis-Af1318_Af1317-CStrepII_TS	6129	7212	lacI	1083	.	71645	30371.9	28044.2
NZ_CP081489.1	4482825	4483914	gene-K5T46_RS21730	1089	-	66690	28271.3	25960.8
NZ_CP081489.1	3559901	3559978	gene-K5T46_RS17025	77	-	3930	1666.01	21636.5
NZ_CP081489.1	3560402	3560479	gene-K5T46_RS17050	77	-	3894	1650.75	21438.3
NZ_CP081489.1	1476608	1476724	gene-K5T46_RS07025	116	-	5474	2320.55	20004.7
NZ_CP081489.1	4396246	4396362	gene-K5T46_RS21265	116	-	3767	1596.91	13766.5
NZ_CP081489.1	2155026	2155142	gene-K5T46_RS10215	116	-	3736	1583.77	13653.2
NZ_CP081489.1	2016366	2016933	gene-K5T46_RS09510	567	+	15941	6757.73	11918.4
NZ_CP081489.1	1278773	1278957	gene-K5T46_RS06105	184	+	4676	1982.26	10773.1
NZ_CP081489.1	1534538	1534598	gene-K5T46_RS07315	60	-	1359	576.109	9601.82
NZ_CP081489.1	3474328	3474436	gene-K5T46_RS16640	108	-	2206	935.171	8658.99
NZ_CP081489.1	2253218	2253334	gene-K5T46_RS10685	116	-	2225	943.225	8131.25
pETDuet-1_NHis-Af1318_Af1317-CStrepII_TS	5366	5558	ROP	192	.	3680	1560.03	8125.16
NZ_CP081489.1	4492198	4492274	gene-K5T46_RS21800	76	-	1301	551.522	7256.87
NZ_CP081489.1	4413125	4413212	gene-K5T46_RS21370	87	+	1377	583.74	6709.65
NZ_CP081489.1	2119151	2119238	gene-K5T46_RS10025	87	-	1313	556.609	6397.8
NZ_CP081489.1	4413240	4413327	gene-K5T46_RS21375	87	+	1306	553.642	6363.7
NZ_CP081489.1	4413361	4413448	gene-K5T46_RS21380	87	+	1264	535.837	6159.04
NZ_CP081489.1	4474828	4476370	gene-K5T46_RS21690	1542	+	20547	8710.32	5648.71
NZ_CP081489.1	3266391	3266468	gene-K5T46_RS15605	77	+	949	402.302	5224.7
NZ_CP081489.1	4497485	4497562	gene-K5T46_RS21860	77	-	905	383.649	4982.45
NZ_CP081489.1	3266281	3266358	gene-K5T46_RS15600	77	+	901	381.953	4960.43
NZ_CP081489.1	3266171	3266248	gene-K5T46_RS15595	77	+	874	370.507	4811.78
NZ_CP081489.1	3635830	3635906	gene-K5T46_RS17380	76	-	831	352.279	4635.25
NZ_CP081489.1	4457625	4457701	gene-K5T46_RS21575	76	+	816	345.92	4551.58
NZ_CP081489.1	275722	275788	gene-K5T46_RS01325	66	-	693	293.778	4451.18
NZ_CP081489.1	3636060	3636136	gene-K5T46_RS17390	76	-	780	330.659	4350.77
NZ_CP081489.1	2154811	2154887	gene-K5T46_RS10205	76	-	758	321.333	4228.06
NZ_CP081489.1	3635945	3636021	gene-K5T46_RS17385	76	-	758	321.333	4228.06
NZ_CP081489.1	118858	119074	gene-K5T46_RS00565	216	+	2121	899.138	4162.67
NZ_CP081489.1	3237096	3237192	gene-K5T46_RS15450	96	+	797	337.865	3519.43
NZ_CP081489.1	4249467	4249544	gene-K5T46_RS20480	77	+	609	258.168	3352.83
NZ_CP081489.1	3010811	3011084	gene-K5T46_RS14360	273	+	2148	910.583	3335.47
NZ_CP081489.1	4492316	4492393	gene-K5T46_RS21805	77	-	596	252.657	3281.26
NZ_CP081489.1	4465061	4467967	gene-K5T46_RS21645	2906	-	21950	9305.08	3202.02
NZ_CP081489.1	4490523	4490706	gene-K5T46_RS21785	183	-	1210	512.945	2802.98
NZ_CP081489.1	2119258	2119334	gene-K5T46_RS10030	76	-	462	195.852	2577
NZ_CP081489.1	3237191	3237296	gene-K5T46_RS15455	105	+	616	261.136	2487.01
NZ_CP081489.1	4055776	4056118	gene-K5T46_RS19450	342	+	1939	821.984	2403.46
NZ_CP081489.1	2151423	2151522	gene-K5T46_RS10185	99	-	561	237.82	2402.22
NZ_CP081489.1	3573985	3574072	gene-K5T46_RS17105	87	-	473	200.515	2304.77
NZ_CP081489.1	4079886	4079963	gene-K5T46_RS19590	77	+	402	170.416	2213.2
NZ_CP081489.1	4492698	4492774	gene-K5T46_RS21820	76	-	395	167.449	2203.28
NZ_CP081489.1	3073786	3073879	gene-K5T46_RS14655	93	-	482	204.33	2197.1
NZ_CP081489.1	2253464	2253579	gene-K5T46_RS10695	115	-	578	245.027	2130.67
NZ_CP081489.1	4492474	4492550	gene-K5T46_RS21810	76	-	381	161.514	2125.19
NZ_CP081489.1	4396115	4396192	gene-K5T46_RS21260	77	-	381	161.514	2097.59
NZ_CP081489.1	4497562	4497638	gene-K5T46_RS21865	76	-	359	152.188	2002.47
NZ_CP081489.1	3002173	3002263	gene-K5T46_RS14330	90	-	410	173.808	1931.2
NZ_CP081489.1	4492586	4492662	gene-K5T46_RS21815	76	-	344	145.829	1918.8
NZ_CP081489.1	2490563	2490800	gene-K5T46_RS11920	237	+	1054	446.813	1885.29
NZ_CP081489.1	4454044	4454160	gene-K5T46_RS21555	116	+	503	213.233	1838.21
NZ_CP081489.1	2942512	2942576	gene-K5T46_RS14065	64	-	272	115.307	1801.67
NZ_CP081489.1	2154895	2154972	gene-K5T46_RS10210	77	-	323	136.927	1778.27
NZ_CP081489.1	2159116	2159203	gene-K5T46_RS10230	87	-	363	153.884	1768.78
NZ_CP081489.1	3751760	3751826	gene-K5T46_RS17920	66	+	274	116.155	1759.92
NZ_CP081489.1	521724	522267	gene-K5T46_RS02455	543	-	2213	938.138	1727.7
NZ_CP081489.1	3388990	3389075	gene-K5T46_RS16170	85	+	341	144.557	1700.67
NZ_CP081489.1	368669	368756	gene-K5T46_RS01735	87	+	342	144.981	1666.45
NZ_CP081489.1	4457709	4457794	gene-K5T46_RS21580	85	+	326	138.198	1625.86
NZ_CP081489.1	663306	663394	gene-K5T46_RS03145	88	+	335	142.014	1613.79
NZ_CP081489.1	4493636	4493712	gene-K5T46_RS21835	76	-	289	122.513	1612.02
NZ_CP081489.1	3389284	3389369	gene-K5T46_RS16180	85	+	321	136.079	1600.93
NZ_CP081489.1	3383690	3384104	gene-K5T46_RS16140	414	+	1506	638.426	1542.09
NZ_CP081489.1	3140765	3140855	gene-K5T46_RS14995	90	-	322	136.503	1516.7
NZ_CP081489.1	3475214	3475562	gene-K5T46_RS16650	348	+	1244	527.358	1515.4
NZ_CP081489.1	1221778	1221852	gene-K5T46_RS05860	74	-	256	108.524	1466.54
NZ_CP081489.1	2119032	2119109	gene-K5T46_RS10020	77	-	266	112.763	1464.46
NZ_CP081489.1	769079	769167	gene-K5T46_RS03585	88	+	293	124.209	1411.47
NZ_CP081489.1	3474816	3475221	gene-K5T46_RS16645	405	+	1342	568.903	1404.7
NZ_CP081489.1	3559779	3559854	gene-K5T46_RS17020	75	-	242	102.589	1367.85
NZ_CP081489.1	3073706	3073783	gene-K5T46_RS14650	77	-	246	104.285	1354.35
NZ_CP081489.1	2436512	2436600	gene-K5T46_RS11620	88	-	281	119.122	1353.66
NZ_CP081489.1	3560309	3560394	gene-K5T46_RS17045	85	-	270	114.459	1346.57
NZ_CP081489.1	3141846	3141922	gene-K5T46_RS15005	76	+	239	101.317	1333.12
NZ_CP081489.1	3159558	3159634	gene-K5T46_RS15060	76	+	232	98.3498	1294.08
NZ_CP081489.1	4388112	4388189	gene-K5T46_RS21210	77	-	235	99.6216	1293.79
NZ_CP081489.1	1715794	1715881	gene-K5T46_RS08130	87	+	263	111.491	1281.51
NZ_CP081489.1	1111949	1112034	gene-K5T46_RS05325	85	-	254	107.676	1266.78
NZ_CP081489.1	3025828	3025925	gene-K5T46_RS14435	97	+	289	122.513	1263.02
NZ_CP081489.1	1140905	1140959	gene-K5T46_RS05465	54	-	158	66.9796	1240.36
NZ_CP081489.1	3157149	3157225	gene-K5T46_RS15045	76	+	219	92.8388	1221.56
NZ_CP081489.1	4074102	4074465	gene-K5T46_RS19565	363	+	1036	439.183	1209.87
NZ_CP081489.1	3155325	3155401	gene-K5T46_RS15035	76	-	216	91.5671	1204.83
NZ_CP081489.1	3767813	3768296	gene-K5T46_RS17995	483	+	1369	580.349	1201.55
NZ_CP081489.1	708035	709124	gene-K5T46_RS03355	1089	+	2880	1220.89	1121.11
NZ_CP081489.1	2460193	2460439	gene-K5T46_RS11760	246	-	647	274.277	1114.95
NZ_CP081489.1	3560211	3560286	gene-K5T46_RS17040	75	-	196	83.0886	1107.85
NZ_CP081489.1	3834231	3834588	gene-K5T46_RS18380	357	+	913	387.04	1084.15
NZ_CP081489.1	1799675	1799885	gene-K5T46_RS08565	210	+	536	227.222	1082.01
NZ_CP081489.1	2961700	2963347	gene-K5T46_RS14165	1647	-	3974	1684.66	1022.87
NZ_CP081489.1	3559667	3559742	gene-K5T46_RS17015	75	-	178	75.458	1006.11
NZ_CP081489.1	1798345	1798489	gene-K5T46_RS08550	144	+	335	142.014	986.206
NZ_CP081489.1	3559993	3560068	gene-K5T46_RS17030	75	-	168	71.2188	949.584
NZ_CP081489.1	2198341	2198647	gene-K5T46_RS10435	306	+	680	288.267	942.048
NZ_CP081489.1	275385	275730	gene-K5T46_RS01320	345	-	731	309.887	898.222
NZ_CP081489.1	2277415	2278168	gene-K5T46_RS10865	753	+	1592	674.883	896.259
NZ_CP081489.1	4281192	4282455	gene-K5T46_RS20640	1263	-	2622	1111.52	880.065
NZ_CP081489.1	3560102	3560177	gene-K5T46_RS17035	75	-	152	64.4361	859.148
NZ_CP081489.1	1718481	1718979	gene-K5T46_RS08150	498	-	1001	424.345	852.099
NZ_CP081489.1	2257147	2257333	gene-K5T46_RS10730	186	-	373	158.123	850.122
NZ_CP081489.1	492000	492108	gene-K5T46_RS02305	108	+	205	86.9039	804.666
NZ_CP081489.1	840096	840225	gene-K5T46_RS03965	129	-	242	102.589	795.264
NZ_CP081489.1	4237688	4237760	gene-K5T46_RS20420	72	-	135	57.2294	794.853
NZ_CP081489.1	824730	824790	gene-K5T46_RS03885	60	+	112	47.4792	791.32
NZ_CP081489.1	4457910	4457985	gene-K5T46_RS21585	75	+	140	59.349	791.32
NZ_CP081489.1	2151286	2151337	gene-K5T46_RS10180	51	-	93	39.4247	773.033
NZ_CP081489.1	3831105	3831459	gene-K5T46_RS18350	354	+	640	271.31	766.412
NZ_CP081489.1	4099357	4099762	gene-K5T46_RS19695	405	+	731	309.887	765.152
NZ_CP081489.1	2736130	2736206	gene-K5T46_RS13110	76	-	137	58.0773	764.174
NZ_CP081489.1	4072114	4072456	gene-K5T46_RS19545	342	+	585	247.994	725.129
NZ_CP081489.1	3751761	3751881	id-NZ_CP081489.1:3751762..3751881	120	+	203	86.0561	717.134
NZ_CP081489.1	3638835	3638911	gene-K5T46_RS17410	76	+	126	53.4141	702.817
NZ_CP081489.1	3122849	3123989	gene-K5T46_RS14895	1140	-	1863	789.766	692.777
NZ_CP081489.1	1212915	1213224	gene-K5T46_RS05815	309	-	502	212.809	688.701
NZ_CP081489.1	926066	927023	gene-K5T46_RS04420	957	-	1550	657.078	686.602
NZ_CP081489.1	3874185	3874281	gene-K5T46_RS18620	96	-	151	64.0122	666.793
NZ_CP081489.1	2253373	2253449	gene-K5T46_RS10690	76	-	119	50.4467	663.772
NZ_CP081489.1	1477053	1477129	gene-K5T46_RS07035	76	+	117	49.5988	652.616
NZ_CP081489.1	3493941	3494055	gene-K5T46_RS16710	114	+	175	74.1863	650.757
NZ_CP081489.1	4236945	4237347	gene-K5T46_RS20410	402	+	615	260.712	648.537
NZ_CP081489.1	4474238	4474352	gene-K5T46_RS21685	114	-	174	73.7624	647.038
NZ_CP081489.1	3477343	3478060	gene-K5T46_RS16660	717	+	1084	459.531	640.908
NZ_CP081489.1	4109650	4110949	gene-K5T46_RS19750	1299	+	1949	826.223	636.046
NZ_CP081489.1	3472839	3474123	gene-K5T46_RS16635	1284	-	1893	802.484	624.987
NZ_CP081489.1	103235	103295	gene-K5T46_RS00495	60	+	87	36.8812	614.686
NZ_CP081489.1	1889966	1890209	gene-K5T46_RS08990	243	-	349	147.949	608.842
NZ_CP081489.1	2789052	2790192	gene-K5T46_RS13305	1140	+	1609	682.09	598.324
NZ_CP081489.1	479903	480140	gene-K5T46_RS02245	237	+	334	141.59	597.425
NZ_CP081489.1	3312343	3312673	gene-K5T46_RS15785	330	+	465	197.124	597.344
NZ_CP081489.1	4488946	4489644	gene-K5T46_RS21770	698	+	930	394.247	564.824
NZ_CP081489.1	3139665	3140196	gene-K5T46_RS14990	531	+	696	295.049	555.649
NZ_CP081489.1	2788142	2788745	gene-K5T46_RS13300	603	-	788	334.05	553.98
NZ_CP081489.1	2790195	2791164	gene-K5T46_RS13310	969	+	1242	526.511	543.355
NZ_CP081489.1	2424750	2425785	gene-K5T46_RS11565	1035	-	1324	561.272	542.292
NZ_CP081489.1	2279319	2279577	gene-K5T46_RS10875	258	-	330	139.894	542.225
NZ_CP081489.1	1333060	1333136	gene-K5T46_RS06385	76	+	95	40.2725	529.902
NZ_CP081489.1	1794536	1795418	gene-K5T46_RS08530	882	+	1102	467.162	529.662
NZ_CP081489.1	55879	56167	gene-K5T46_RS00250	288	-	350	148.373	515.182
NZ_CP081489.1	2268905	2268953	gene-K5T46_RS10825	48	-	57	24.1635	503.407
NZ_CP081489.1	2971745	2971821	gene-K5T46_RS14210	76	+	90	38.1529	502.012
NZ_CP081489.1	3452290	3452659	gene-K5T46_RS16530	369	-	436	184.83	500.894
NZ_CP081489.1	468917	468994	gene-K5T46_RS02185	77	+	90	38.1529	495.493
NZ_CP081489.1	442285	442753	gene-K5T46_RS02060	468	+	544	230.613	492.764
NZ_CP081489.1	3985047	3985236	gene-K5T46_RS19120	189	-	219	92.8388	491.211
NZ_CP081489.1	2906750	2907116	gene-K5T46_RS13905	366	-	418	177.199	484.151
NZ_CP081489.1	516881	517181	gene-K5T46_RS02425	300	-	339	143.709	479.031
NZ_CP081489.1	3768210	3768396	gene-K5T46_RS18000	186	-	210	89.0235	478.621
NZ_CP081489.1	3451580	3452291	gene-K5T46_RS16525	711	-	793	336.17	472.813
NZ_CP081489.1	4125992	4126643	gene-K5T46_RS19835	651	+	715	303.104	465.597
NZ_CP081489.1	513895	514360	gene-K5T46_RS02405	465	-	491	208.145	447.625
NZ_CP081489.1	1703614	1704172	gene-K5T46_RS08070	558	+	584	247.57	443.674
NZ_CP081489.1	2573644	2574376	gene-K5T46_RS12335	732	+	765	324.3	443.033
NZ_CP081489.1	360980	361346	gene-K5T46_RS01690	366	-	380	161.09	440.137
NZ_CP081489.1	666297	666615	gene-K5T46_RS03170	318	+	323	136.927	430.587
NZ_CP081489.1	2958116	2958683	gene-K5T46_RS14145	567	-	574	243.331	429.155
NZ_CP081489.1	2667731	2670806	gene-K5T46_RS12795	3075	+	3105	1316.28	428.057
NZ_CP081489.1	160497	160863	gene-K5T46_RS00760	366	+	366	155.155	423.922
NZ_CP081489.1	1760739	1760805	gene-K5T46_RS08365	66	+	66	27.9788	423.922
NZ_CP081489.1	2395968	2396811	gene-K5T46_RS11440	843	+	838	355.246	421.407
NZ_CP081489.1	3838053	3838272	gene-K5T46_RS18415	219	+	210	89.0235	406.5
NZ_CP081489.1	761962	762457	gene-K5T46_RS03555	495	-	471	199.667	403.368
NZ_CP081489.1	3451109	3451283	gene-K5T46_RS16515	174	-	165	69.9471	401.995
NZ_CP081489.1	4291461	4291558	id-NZ_CP081489.1:4291462..4291558	97	-	90	38.1529	393.329
NZ_CP081489.1	881124	882048	gene-K5T46_RS04165	924	+	846	358.638	388.136
NZ_CP081489.1	3836703	3837087	gene-K5T46_RS18400	384	+	350	148.373	386.387
NZ_CP081489.1	2722099	2722642	gene-K5T46_RS13040	543	+	484	205.178	377.86
NZ_CP081489.1	2418345	2419365	gene-K5T46_RS11530	1020	-	906	384.073	376.542
NZ_CP081489.1	600363	600462	gene-K5T46_RS02840	99	+	87	36.8812	372.537
NZ_CP081489.1	4237898	4238111	gene-K5T46_RS20425	213	-	187	79.2733	372.175
NZ_CP081489.1	4491536	4491665	gene-K5T46_RS21790	129	+	113	47.9031	371.342
NZ_CP081489.1	2119392	2119469	gene-K5T46_RS10035	77	-	67	28.4027	368.867
NZ_CP081489.1	3763731	3765648	gene-K5T46_RS17980	1917	+	1652	700.318	365.32
NZ_CP081489.1	2459649	2459904	gene-K5T46_RS11755	255	-	218	92.4149	362.411
NZ_CP081489.1	1781775	1782006	gene-K5T46_RS08465	231	-	197	83.5125	361.526
NZ_CP081489.1	4443409	4443979	gene-K5T46_RS21510	570	-	485	205.602	360.705
NZ_CP081489.1	957558	958425	gene-K5T46_RS04580	867	-	713	302.256	348.623
NZ_CP081489.1	3475561	3477328	gene-K5T46_RS16655	1767	+	1444	612.143	346.431
NZ_CP081489.1	4282483	4283338	gene-K5T46_RS20645	855	-	697	295.473	345.583
NZ_CP081489.1	930304	930529	gene-K5T46_RS04435	225	-	182	77.1537	342.905
NZ_CP081489.1	3154155	3154872	gene-K5T46_RS15030	717	+	579	245.451	342.33
NZ_CP081489.1	4435902	4436613	gene-K5T46_RS21475	711	-	571	242.059	340.449
NZ_CP081489.1	1715708	1715782	gene-K5T46_RS08125	74	+	59	25.0114	337.992
NZ_CP081489.1	3177949	3178000	gene-K5T46_RS15175	51	+	40	16.9569	332.487
NZ_CP081489.1	4457991	4458067	gene-K5T46_RS21590	76	+	59	25.0114	329.097
NZ_CP081489.1	3683451	3684276	gene-K5T46_RS17605	825	+	624	264.527	320.639
NZ_CP081489.1	1393937	1394468	gene-K5T46_RS06640	531	+	395	167.449	315.347
NZ_CP081489.1	3500299	3500375	gene-K5T46_RS16755	76	+	56	23.7396	312.363
NZ_CP081489.1	3369851	3370025	gene-K5T46_RS16080	174	-	128	54.262	311.85
NZ_CP081489.1	4494419	4494524	gene-K5T46_RS21850	105	+	77	32.642	310.876
NZ_CP081489.1	2306996	2307665	gene-K5T46_RS11015	669	-	489	207.298	309.862
NZ_CP081489.1	941718	941955	gene-K5T46_RS04500	237	-	173	73.3384	309.445
NZ_CP081489.1	3190782	3192207	gene-K5T46_RS15240	1425	-	1034	438.335	307.603
NZ_CP081489.1	1007464	1007827	gene-K5T46_RS04810	363	-	262	111.067	305.971
NZ_CP081489.1	2963390	2963684	gene-K5T46_RS14170	294	-	210	89.0235	302.801
NZ_CP081489.1	2548845	2550144	gene-K5T46_RS12185	1299	-	927	392.975	302.521
NZ_CP081489.1	2170184	2170496	gene-K5T46_RS10290	312	-	220	93.2627	298.919
NZ_CP081489.1	3833968	3834085	gene-K5T46_RS18375	117	+	82	34.7616	297.107
NZ_CP081489.1	3768477	3769604	gene-K5T46_RS18005	1127	+	787	333.626	296.03
NZ_CP081489.1	3549213	3550122	gene-K5T46_RS16975	909	-	634	268.766	295.672
NZ_CP081489.1	837559	837625	gene-K5T46_RS03950	66	+	46	19.5004	295.46
NZ_CP081489.1	2773254	2774331	gene-K5T46_RS13235	1077	-	750	317.941	295.21
NZ_CP081489.1	2791163	2793146	gene-K5T46_RS13315	1983	+	1371	581.196	293.089
NZ_CP081489.1	2938863	2939304	gene-K5T46_RS14045	441	+	304	128.872	292.227
NZ_CP081489.1	3368543	3369797	gene-K5T46_RS16075	1254	+	857	363.301	289.714
NZ_CP081489.1	1895362	1895971	gene-K5T46_RS09020	609	-	414	175.504	288.183
NZ_CP081489.1	674965	676006	gene-K5T46_RS03215	1041	+	707	299.713	287.908
NZ_CP081489.1	457787	458369	gene-K5T46_RS02135	582	+	393	166.601	286.256
NZ_CP081489.1	768608	768827	gene-K5T46_RS03580	219	+	147	62.3165	284.55
NZ_CP081489.1	1085642	1085834	gene-K5T46_RS05180	192	+	128	54.262	282.614
NZ_CP081489.1	1402959	1403259	gene-K5T46_RS06690	300	-	200	84.7843	282.614
NZ_CP081489.1	1975425	1975509	gene-K5T46_RS09325	84	+	56	23.7396	282.614
NZ_CP081489.1	2335188	2335497	gene-K5T46_RS11160	309	-	206	87.3278	282.614
NZ_CP081489.1	1074351	1074732	gene-K5T46_RS05135	381	-	251	106.404	279.276
NZ_CP081489.1	3831980	3832160	gene-K5T46_RS18360	180	+	118	50.0227	277.904
NZ_CP081489.1	2825673	2825733	gene-K5T46_RS13475	60	+	39	16.5329	275.549
NZ_CP081489.1	3233030	3233351	gene-K5T46_RS15420	321	-	208	88.1757	274.691
NZ_CP081489.1	3832605	3833937	gene-K5T46_RS18370	1332	+	859	364.149	273.385
NZ_CP081489.1	3956091	3956280	gene-K5T46_RS19025	189	+	121	51.2945	271.4
NZ_CP081489.1	4293435	4293699	gene-K5T46_RS20710	264	-	169	71.6427	271.374
NZ_CP081489.1	1798563	1798851	gene-K5T46_RS08555	288	+	184	78.0016	270.839
NZ_CP081489.1	3409345	3409897	gene-K5T46_RS16295	552	-	352	149.22	270.327
NZ_CP081489.1	2135511	2135613	gene-K5T46_RS10110	102	-	65	27.5549	270.146
NZ_CP081489.1	875293	875626	gene-K5T46_RS04120	333	-	212	89.8714	269.884
NZ_CP081489.1	2153419	2153758	gene-K5T46_RS10195	339	-	213	90.2953	266.358
NZ_CP081489.1	3408538	3409336	gene-K5T46_RS16290	798	-	497	210.689	264.021
NZ_CP081489.1	2796396	2796663	gene-K5T46_RS13340	267	-	166	70.371	263.562
NZ_CP081489.1	1036622	1036763	gene-K5T46_RS04950	141	+	87	36.8812	261.569
NZ_CP081489.1	1481976	1482963	gene-K5T46_RS07070	987	-	608	257.744	261.139
NZ_CP081489.1	1487563	1488073	gene-K5T46_RS07095	510	+	311	131.84	258.509
NZ_CP081489.1	3074194	3074380	gene-K5T46_RS14660	186	-	113	47.9031	257.544
NZ_CP081489.1	1278402	1278732	gene-K5T46_RS06100	330	+	194	82.2408	249.214
NZ_CP081489.1	2528645	2528924	gene-K5T46_RS12105	279	-	162	68.6753	246.148
NZ_CP081489.1	3162517	3163063	gene-K5T46_RS15080	546	-	314	133.111	243.794
NZ_CP081489.1	2306718	2306943	gene-K5T46_RS11010	225	-	129	54.6859	243.048
NZ_CP081489.1	1573012	1573204	gene-K5T46_RS07500	192	+	108	45.7835	238.456
NZ_CP081489.1	1006970	1007468	gene-K5T46_RS04805	498	-	280	118.698	238.349
NZ_CP081489.1	2547765	2548836	gene-K5T46_RS12180	1071	-	600	254.353	237.491
NZ_CP081489.1	2024280	2024625	gene-K5T46_RS09540	345	-	193	81.8169	237.15
NZ_CP081489.1	2032598	2032675	gene-K5T46_RS09580	77	+	43	18.2286	236.735
NZ_CP081489.1	4280730	4281183	gene-K5T46_RS20635	453	-	252	106.828	235.824
NZ_CP081489.1	2306359	2306719	gene-K5T46_RS11005	360	-	198	83.9365	233.157
NZ_CP081489.1	3940668	3941301	gene-K5T46_RS18930	633	-	348	147.525	233.056
NZ_CP081489.1	2905391	2905475	gene-K5T46_RS13890	84	+	46	19.5004	232.148
NZ_CP081489.1	3700274	3700358	gene-K5T46_RS17685	84	+	46	19.5004	232.148
NZ_CP081489.1	1797947	1798187	gene-K5T46_RS08545	240	-	131	55.5337	231.391
NZ_CP081489.1	1409905	1410406	gene-K5T46_RS06730	501	-	271	114.883	229.307
NZ_CP081489.1	1760943	1761555	gene-K5T46_RS08370	612	+	331	140.318	229.278
NZ_CP081489.1	4493440	4493516	gene-K5T46_RS21830	76	+	41	17.3808	228.695
NZ_CP081489.1	930851	931172	gene-K5T46_RS04445	321	+	173	73.3384	228.469
NZ_CP081489.1	305684	306065	gene-K5T46_RS01455	381	+	205	86.9039	228.094
NZ_CP081489.1	430117	430381	gene-K5T46_RS01990	264	+	142	60.1969	228.018
NZ_CP081489.1	663600	664260	gene-K5T46_RS03150	660	+	355	150.492	228.018
NZ_CP081489.1	4194464	4194749	gene-K5T46_RS20175	285	-	152	64.4361	226.091
NZ_CP081489.1	2925200	2926466	gene-K5T46_RS13985	1266	-	670	284.027	224.35
NZ_CP081489.1	522270	524199	gene-K5T46_RS02460	1929	-	1018	431.552	223.718
NZ_CP081489.1	2670857	2672111	gene-K5T46_RS12800	1254	+	656	278.093	221.764
NZ_CP081489.1	2998788	3000432	gene-K5T46_RS14315	1644	+	859	364.149	221.502
NZ_CP081489.1	2666731	2667497	gene-K5T46_RS12790	766	+	400	169.569	221.369
NZ_CP081489.1	3029462	3029681	gene-K5T46_RS14460	219	-	113	47.9031	218.736
NZ_CP081489.1	521430	521628	gene-K5T46_RS02450	198	-	102	43.24	218.384
NZ_CP081489.1	3614187	3614430	gene-K5T46_RS17290	243	-	125	52.9902	218.067
NZ_CP081489.1	1574048	1574588	gene-K5T46_RS07510	540	+	277	117.426	217.456
NZ_CP081489.1	3759806	3760760	gene-K5T46_RS17955	954	+	489	207.298	217.293
NZ_CP081489.1	4097378	4097708	gene-K5T46_RS19680	330	-	168	71.2188	215.815
NZ_CP081489.1	1279680	1279740	gene-K5T46_RS06115	60	-	30	12.7176	211.961
NZ_CP081489.1	730905	731190	gene-K5T46_RS03440	285	-	142	60.1969	211.217
NZ_CP081489.1	3311729	3312344	gene-K5T46_RS15780	615	+	306	129.72	210.927
NZ_CP081489.1	3314054	3314597	gene-K5T46_RS15800	543	+	270	114.459	210.79
NZ_CP081489.1	2169906	2170164	gene-K5T46_RS10285	258	-	128	54.262	210.318
NZ_CP081489.1	1178573	1179221	gene-K5T46_RS05625	648	-	321	136.079	209.998
NZ_CP081489.1	4311311	4311485	gene-K5T46_RS20780	174	-	86	36.4573	209.524
NZ_CP081489.1	1745038	1745083	gene-K5T46_RS08285	45	+	22	9.32627	207.251
NZ_CP081489.1	3186400	3187567	gene-K5T46_RS15225	1167	-	569	241.211	206.694
NZ_CP081489.1	4125232	4125388	gene-K5T46_RS19825	156	+	76	32.218	206.526
NZ_CP081489.1	4404945	4405021	gene-K5T46_RS21315	76	-	37	15.6851	206.383
NZ_CP081489.1	601590	602949	gene-K5T46_RS02865	1359	-	659	279.364	205.566
NZ_CP081489.1	3865920	3866151	gene-K5T46_RS18575	231	-	112	47.4792	205.538
NZ_CP081489.1	4459100	4460354	gene-K5T46_RS21605	1254	+	605	256.473	204.524
NZ_CP081489.1	882210	883173	gene-K5T46_RS04170	963	+	463	196.276	203.817
NZ_CP081489.1	1799519	1799663	gene-K5T46_RS08560	144	+	69	29.2506	203.129
NZ_CP081489.1	3707518	3707953	gene-K5T46_RS17720	435	-	208	88.1757	202.703
NZ_CP081489.1	2501195	2501573	gene-K5T46_RS11970	378	+	180	76.3059	201.867
NZ_CP081489.1	361342	362284	gene-K5T46_RS01695	942	-	447	189.493	201.16
NZ_CP081489.1	1826352	1826991	gene-K5T46_RS08690	639	+	299	126.753	198.361
NZ_CP081489.1	4357157	4357589	gene-K5T46_RS21055	432	+	202	85.6322	198.223
NZ_CP081489.1	2561623	2562319	gene-K5T46_RS12250	696	+	323	136.927	196.734
NZ_CP081489.1	4473029	4473620	gene-K5T46_RS21675	591	-	274	116.155	196.539
NZ_CP081489.1	1534978	1535335	gene-K5T46_RS07320	357	+	165	69.9471	195.93
NZ_CP081489.1	2582047	2582719	gene-K5T46_RS12390	672	+	309	130.992	194.928
NZ_CP081489.1	731349	733023	gene-K5T46_RS03445	1674	-	768	325.572	194.487
NZ_CP081489.1	941530	941698	gene-K5T46_RS04495	168	-	77	32.642	194.297
NZ_CP081489.1	62995	63655	gene-K5T46_RS00290	660	+	301	127.6	193.334
NZ_CP081489.1	2508046	2508304	gene-K5T46_RS12010	258	+	117	49.5988	192.243
NZ_CP081489.1	2505041	2506346	gene-K5T46_RS11995	1305	+	589	249.69	191.333
NZ_CP081489.1	1463692	1463803	gene-K5T46_RS06965	111	+	50	21.1961	190.956
NZ_CP081489.1	4493218	4493294	gene-K5T46_RS21825	76	+	34	14.4133	189.649
NZ_CP081489.1	4201279	4201540	gene-K5T46_RS20220	261	-	116	49.1749	188.41
NZ_CP081489.1	3828134	3828389	gene-K5T46_RS18315	255	+	113	47.9031	187.855
NZ_CP081489.1	468998	469075	gene-K5T46_RS02190	77	+	34	14.4133	187.186
NZ_CP081489.1	1040721	1040796	gene-K5T46_RS04975	75	+	33	13.9894	186.525
NZ_CP081489.1	3494054	3494348	gene-K5T46_RS16715	294	+	129	54.6859	186.006
NZ_CP081489.1	2565455	2568103	gene-K5T46_RS12295	2648	-	1161	492.173	185.866
NZ_CP081489.1	3029706	3030081	gene-K5T46_RS14465	375	-	164	69.5231	185.395
NZ_CP081489.1	2938164	2938290	gene-K5T46_RS14035	126	+	55	23.3157	185.045
NZ_CP081489.1	249783	250239	gene-K5T46_RS01205	456	-	199	84.3604	185.001
NZ_CP081489.1	4110945	4111269	gene-K5T46_RS19755	324	-	141	59.7729	184.484
NZ_CP081489.1	3874734	3874968	gene-K5T46_RS18630	234	+	101	42.8161	182.975
NZ_CP081489.1	3375999	3377631	gene-K5T46_RS16115	1632	-	704	298.441	182.868
NZ_CP081489.1	1086392	1086650	gene-K5T46_RS05190	258	-	111	47.0553	182.385
NZ_CP081489.1	524720	526620	gene-K5T46_RS02465	1900	+	815	345.496	181.84
NZ_CP081489.1	3828935	3829250	gene-K5T46_RS18325	315	+	135	57.2294	181.681
NZ_CP081489.1	3827943	3828135	gene-K5T46_RS18310	192	+	82	34.7616	181.05
NZ_CP081489.1	615012	616521	gene-K5T46_RS02910	1509	-	642	272.158	180.356
NZ_CP081489.1	1476927	1477007	gene-K5T46_RS07030	80	+	34	14.4133	180.167
NZ_CP081489.1	1129645	1130062	gene-K5T46_RS05405	417	-	177	75.0341	179.938
NZ_CP081489.1	3121794	3122787	gene-K5T46_RS14890	993	-	418	177.199	178.448
NZ_CP081489.1	4054768	4055506	gene-K5T46_RS19445	738	+	310	131.416	178.07
NZ_CP081489.1	4441361	4442528	gene-K5T46_RS21500	1167	-	490	207.722	177.996
NZ_CP081489.1	2331131	2331305	gene-K5T46_RS11130	174	+	73	30.9463	177.852
NZ_CP081489.1	3134091	3135450	gene-K5T46_RS14960	1359	-	568	240.787	177.18
NZ_CP081489.1	2397808	2398270	gene-K5T46_RS11450	462	+	191	80.969	175.258
NZ_CP081489.1	155967	156630	gene-K5T46_RS00720	663	+	274	116.155	175.195
NZ_CP081489.1	2096409	2096790	gene-K5T46_RS09905	381	+	156	66.1318	173.574
NZ_CP081489.1	1839073	1839403	gene-K5T46_RS08775	330	-	134	56.8055	172.138
NZ_CP081489.1	673251	673881	gene-K5T46_RS03205	630	-	255	108.1	171.587
NZ_CP081489.1	3415493	3415570	gene-K5T46_RS16345	77	-	31	13.1416	170.67
NZ_CP081489.1	3025354	3025666	gene-K5T46_RS14430	312	-	124	52.5663	168.482
NZ_CP081489.1	4461359	4461653	gene-K5T46_RS21620	294	+	116	49.1749	167.262
NZ_CP081489.1	4386997	4387783	gene-K5T46_RS21205	786	-	310	131.416	167.196
NZ_CP081489.1	1085859	1086270	gene-K5T46_RS05185	411	-	162	68.6753	167.093
NZ_CP081489.1	3728315	3729095	gene-K5T46_RS17805	780	+	306	129.72	166.308
NZ_CP081489.1	2164834	2165128	gene-K5T46_RS10260	294	+	114	48.3271	164.378
NZ_CP081489.1	1129096	1129600	gene-K5T46_RS05400	504	+	195	82.6647	164.017
NZ_CP081489.1	347133	348396	gene-K5T46_RS01635	1263	-	488	206.874	163.796
NZ_CP081489.1	92813	92984	gene-K5T46_RS00440	171	-	66	27.9788	163.619
NZ_CP081489.1	442799	443234	gene-K5T46_RS02065	435	-	167	70.7949	162.747
NZ_CP081489.1	3724282	3724666	gene-K5T46_RS17785	384	-	145	61.4686	160.075
NZ_CP081489.1	3831473	3831977	gene-K5T46_RS18355	504	+	190	80.5451	159.812
NZ_CP081489.1	3335050	3335383	gene-K5T46_RS15910	333	-	125	52.9902	159.13
NZ_CP081489.1	94272	94563	gene-K5T46_RS00450	291	+	109	46.2074	158.788
NZ_CP081489.1	1354075	1354726	gene-K5T46_RS06485	651	-	243	103.013	158.238
NZ_CP081489.1	477414	477624	gene-K5T46_RS02235	210	-	78	33.0659	157.457
NZ_CP081489.1	2197845	2198325	gene-K5T46_RS10430	480	+	177	75.0341	156.321
NZ_CP081489.1	2149637	2151284	gene-K5T46_RS10175	1647	-	607	257.32	156.236
NZ_CP081489.1	3232756	3233041	gene-K5T46_RS15415	285	-	105	44.5118	156.182
NZ_CP081489.1	4050222	4052796	gene-K5T46_RS19430	2574	-	948	401.878	156.13
NZ_CP081489.1	4496881	4496974	gene-K5T46_RS21855	93	-	34	14.4133	154.982
NZ_CP081489.1	3593117	3593426	gene-K5T46_RS17205	309	+	112	47.4792	153.654
NZ_CP081489.1	4460353	4460635	gene-K5T46_RS21610	282	+	102	43.24	153.333
NZ_CP081489.1	1311074	1312469	gene-K5T46_RS06260	1395	+	504	213.656	153.159
NZ_CP081489.1	1159674	1160016	gene-K5T46_RS05545	342	-	123	52.1424	152.463
NZ_CP081489.1	3832163	3832598	gene-K5T46_RS18365	435	+	156	66.1318	152.027
NZ_CP081489.1	2396838	2397797	gene-K5T46_RS11445	959	+	341	144.557	150.737
NZ_CP081489.1	3826176	3826455	gene-K5T46_RS18290	279	+	99	41.9682	150.424
NZ_CP081489.1	277244	277292	gene-K5T46_RS01335	48	-	17	7.20667	150.139
NZ_CP081489.1	2174955	2175507	gene-K5T46_RS10325	552	-	195	82.6647	149.755
NZ_CP081489.1	3647121	3647610	gene-K5T46_RS17460	489	-	172	72.9145	149.109
NZ_CP081489.1	3830157	3830550	gene-K5T46_RS18340	393	+	138	58.5012	148.858
NZ_CP081489.1	4091836	4093039	gene-K5T46_RS19655	1203	-	421	178.471	148.355
NZ_CP081489.1	309708	310371	gene-K5T46_RS01480	663	+	232	98.3498	148.341
NZ_CP081489.1	3847987	3848518	gene-K5T46_RS18480	531	+	185	78.4255	147.694
NZ_CP081489.1	688524	689067	gene-K5T46_RS03270	543	-	188	79.6973	146.772
NZ_CP081489.1	4312761	4314201	gene-K5T46_RS20790	1440	-	494	209.417	145.429
NZ_CP081489.1	530323	530860	gene-K5T46_RS02495	537	-	184	78.0016	145.254
NZ_CP081489.1	1477132	1477208	gene-K5T46_RS07040	76	+	26	11.022	145.026
NZ_CP081489.1	2442899	2443355	gene-K5T46_RS11665	456	+	156	66.1318	145.026
NZ_CP081489.1	3370167	3371628	gene-K5T46_RS16085	1461	+	497	210.689	144.209
NZ_CP081489.1	933892	934390	gene-K5T46_RS04455	498	-	169	71.6427	143.861
NZ_CP081489.1	3234688	3235588	gene-K5T46_RS15440	900	-	304	128.872	143.191
NZ_CP081489.1	3497485	3498778	gene-K5T46_RS16740	1293	+	436	184.83	142.946
NZ_CP081489.1	2028904	2029189	gene-K5T46_RS09560	285	+	96	40.6965	142.795
NZ_CP081489.1	1169177	1169918	gene-K5T46_RS05580	741	-	248	105.133	141.879
NZ_CP081489.1	3446414	3447230	gene-K5T46_RS16490	816	-	273	115.731	141.827
NZ_CP081489.1	102860	102920	gene-K5T46_RS00490	60	+	20	8.47843	141.307
NZ_CP081489.1	2867295	2868174	gene-K5T46_RS13645	879	+	293	124.209	141.307
NZ_CP081489.1	583606	584020	gene-K5T46_RS02755	414	-	137	58.0773	140.283
NZ_CP081489.1	349224	350145	gene-K5T46_RS01645	921	-	301	127.6	138.545
NZ_CP081489.1	2279820	2280852	gene-K5T46_RS10880	1032	+	337	142.862	138.432
NZ_CP081489.1	958427	959633	gene-K5T46_RS04585	1206	-	390	165.329	137.089
NZ_CP081489.1	2966044	2967481	gene-K5T46_RS14185	1437	+	461	195.428	135.997
NZ_CP081489.1	1812678	1812978	gene-K5T46_RS08630	300	-	96	40.6965	135.655
NZ_CP081489.1	3580067	3580217	gene-K5T46_RS17145	150	-	48	20.3482	135.655
NZ_CP081489.1	3135449	3136121	gene-K5T46_RS14965	672	-	215	91.1431	135.63
NZ_CP081489.1	2609349	2610288	gene-K5T46_RS12515	939	-	299	126.753	134.987
NZ_CP081489.1	2709490	2710186	gene-K5T46_RS12970	696	-	221	93.6867	134.607
NZ_CP081489.1	3200180	3200303	gene-K5T46_RS15265	123	+	39	16.5329	134.414
NZ_CP081489.1	3005015	3007244	gene-K5T46_RS14345	2229	-	702	297.593	133.51
NZ_CP081489.1	4343698	4344181	gene-K5T46_RS20980	483	-	152	64.4361	133.408
NZ_CP081489.1	2073529	2074294	gene-K5T46_RS09795	765	-	240	101.741	132.995
NZ_CP081489.1	676081	676534	gene-K5T46_RS03220	453	-	142	60.1969	132.885
NZ_CP081489.1	3948628	3948829	gene-K5T46_RS18970	201	+	63	26.7071	132.871
NZ_CP081489.1	3260020	3260416	gene-K5T46_RS15560	396	-	124	52.5663	132.743
NZ_CP081489.1	1397464	1397710	gene-K5T46_RS06660	246	-	77	32.642	132.691
NZ_CP081489.1	98728	99793	gene-K5T46_RS00470	1065	+	333	141.166	132.55
NZ_CP081489.1	2575399	2575444	gene-K5T46_RS12350	45	+	14	5.9349	131.887
NZ_CP081489.1	1668085	1668127	gene-K5T46_RS07880	42	-	13	5.51098	131.214
NZ_CP081489.1	1893639	1893849	gene-K5T46_RS09010	210	-	65	27.5549	131.214
NZ_CP081489.1	2164079	2164709	gene-K5T46_RS10255	630	-	195	82.6647	131.214
NZ_CP081489.1	4016130	4016496	gene-K5T46_RS19245	366	-	113	47.9031	130.883
NZ_CP081489.1	2710178	2711606	gene-K5T46_RS12975	1428	-	440	186.525	130.62
NZ_CP081489.1	1175391	1176804	gene-K5T46_RS05610	1413	-	435	184.406	130.507
NZ_CP081489.1	1791578	1792277	gene-K5T46_RS08520	699	+	214	90.7192	129.784
NZ_CP081489.1	630524	631784	gene-K5T46_RS02985	1260	-	384	162.786	129.195
NZ_CP081489.1	2305740	2306055	gene-K5T46_RS10995	315	-	96	40.6965	129.195
NZ_CP081489.1	3306220	3306799	gene-K5T46_RS15760	579	+	176	74.6102	128.86
NZ_CP081489.1	3846912	3847467	gene-K5T46_RS18475	555	-	168	71.2188	128.322
NZ_CP081489.1	2483888	2484848	gene-K5T46_RS11880	960	+	290	122.937	128.06
NZ_CP081489.1	3056658	3057453	gene-K5T46_RS14570	795	-	239	101.317	127.443
NZ_CP081489.1	3000428	3001097	gene-K5T46_RS14320	669	+	201	85.2082	127.367
NZ_CP081489.1	2443395	2443851	gene-K5T46_RS11670	456	+	137	58.0773	127.362
NZ_CP081489.1	4483899	4484918	gene-K5T46_RS21735	1019	-	306	129.72	127.301
NZ_CP081489.1	980166	983664	gene-K5T46_RS04670	3498	+	1049	444.694	127.128
NZ_CP081489.1	1328414	1329671	gene-K5T46_RS06365	1257	+	375	158.971	126.468
NZ_CP081489.1	1213309	1214260	gene-K5T46_RS05820	951	-	283	119.97	126.151
NZ_CP081489.1	1535338	1536466	gene-K5T46_RS07325	1128	+	335	142.014	125.899
NZ_CP081489.1	4083013	4083529	gene-K5T46_RS19610	516	+	153	64.86	125.698
NZ_CP081489.1	3765736	3766867	gene-K5T46_RS17985	1131	+	333	141.166	124.815
NZ_CP081489.1	2554684	2555215	gene-K5T46_RS12205	531	+	156	66.1318	124.542
NZ_CP081489.1	643578	643752	gene-K5T46_RS03035	174	-	51	21.62	124.253
NZ_CP081489.1	1271951	1272341	gene-K5T46_RS06065	390	-	114	48.3271	123.916
NZ_CP081489.1	1396894	1397380	gene-K5T46_RS06655	486	+	142	60.1969	123.862
NZ_CP081489.1	543544	543883	gene-K5T46_RS02560	339	-	99	41.9682	123.8
NZ_CP081489.1	2149377	2149641	gene-K5T46_RS10170	264	-	77	32.642	123.644
NZ_CP081489.1	2965231	2965708	gene-K5T46_RS14180	477	-	139	58.9251	123.533
NZ_CP081489.1	3829264	3829804	gene-K5T46_RS18330	540	+	157	66.5557	123.251
NZ_CP081489.1	3751906	3754369	gene-K5T46_RS17925	2463	+	716	303.528	123.235
NZ_CP081489.1	2871275	2871854	gene-K5T46_RS13665	579	+	168	71.2188	123.003
NZ_CP081489.1	339089	339134	gene-K5T46_RS01590	45	-	13	5.51098	122.466
NZ_CP081489.1	837677	838193	gene-K5T46_RS03955	516	+	149	63.1643	122.411
NZ_CP081489.1	4000246	4000723	gene-K5T46_RS19195	477	+	137	58.0773	121.755
NZ_CP081489.1	2209899	2210298	gene-K5T46_RS10500	399	+	114	48.3271	121.12
NZ_CP081489.1	3185274	3186255	gene-K5T46_RS15220	981	-	278	117.85	120.133
NZ_CP081489.1	1542613	1543492	gene-K5T46_RS07360	879	-	249	105.556	120.087
NZ_CP081489.1	1103369	1104488	gene-K5T46_RS05295	1119	-	315	133.535	119.334
NZ_CP081489.1	2708579	2709248	gene-K5T46_RS12965	669	+	188	79.6973	119.129
NZ_CP081489.1	628735	628963	gene-K5T46_RS02975	228	+	64	27.131	118.996
NZ_CP081489.1	3303087	3303711	gene-K5T46_RS15745	624	-	175	74.1863	118.888
NZ_CP081489.1	879691	879880	gene-K5T46_RS04150	189	+	53	22.4678	118.877
NZ_CP081489.1	1005622	1005697	gene-K5T46_RS04795	75	-	21	8.90235	118.698
NZ_CP081489.1	3684643	3685372	gene-K5T46_RS17610	729	+	204	86.48	118.628
NZ_CP081489.1	679136	679304	gene-K5T46_RS03235	168	-	47	19.9243	118.597
NZ_CP081489.1	4018180	4018609	gene-K5T46_RS19260	429	-	120	50.8706	118.579
NZ_CP081489.1	2716377	2716506	gene-K5T46_RS13005	129	-	36	15.2612	118.304
NZ_CP081489.1	3707376	3707448	gene-K5T46_RS17715	72	+	20	8.47843	117.756
NZ_CP081489.1	3810647	3810842	gene-K5T46_RS18185	195	+	54	22.8918	117.394
NZ_CP081489.1	2737585	2738689	gene-K5T46_RS13120	1104	-	305	129.296	117.116
NZ_CP081489.1	3327114	3327534	gene-K5T46_RS15865	420	-	116	49.1749	117.083
NZ_CP081489.1	89176	89848	gene-K5T46_RS00420	672	+	184	78.0016	116.074
NZ_CP081489.1	348392	349223	gene-K5T46_RS01640	831	-	227	96.2302	115.8
NZ_CP081489.1	2255493	2256951	gene-K5T46_RS10725	1458	-	398	168.721	115.721
NZ_CP081489.1	2575696	2576020	gene-K5T46_RS12355	324	+	88	37.3051	115.139
NZ_CP081489.1	3941602	3942007	gene-K5T46_RS18935	405	+	110	46.6314	115.139
NZ_CP081489.1	4477915	4479028	gene-K5T46_RS21700	1113	+	302	128.024	115.026
NZ_CP081489.1	2258188	2258461	gene-K5T46_RS10740	273	+	74	31.3702	114.909
NZ_CP081489.1	2982015	2982288	gene-K5T46_RS14250	273	-	74	31.3702	114.909
NZ_CP081489.1	97977	98727	gene-K5T46_RS00465	750	+	203	86.0561	114.741
NZ_CP081489.1	2624972	2625335	gene-K5T46_RS12585	363	+	98	41.5443	114.447
NZ_CP081489.1	1266104	1266416	gene-K5T46_RS06045	312	-	84	35.6094	114.133
NZ_CP081489.1	323041	324466	gene-K5T46_RS01530	1425	-	382	161.938	113.641
NZ_CP081489.1	3028153	3028624	gene-K5T46_RS14450	471	-	126	53.4141	113.406
NZ_CP081489.1	456163	456511	gene-K5T46_RS02125	348	-	93	39.4247	113.289
NZ_CP081489.1	4030272	4030536	gene-K5T46_RS19335	264	-	70	29.6745	112.403
NZ_CP081489.1	2793142	2794033	gene-K5T46_RS13320	891	+	236	100.045	112.284
NZ_CP081489.1	4019314	4019698	gene-K5T46_RS19270	384	-	101	42.8161	111.5
NZ_CP081489.1	1489478	1490213	gene-K5T46_RS07110	735	+	192	81.3929	110.739
NZ_CP081489.1	2772141	2772792	gene-K5T46_RS13225	651	-	170	72.0667	110.701
NZ_CP081489.1	824892	825153	gene-K5T46_RS03890	261	-	68	28.8267	110.447
NZ_CP081489.1	643741	643972	gene-K5T46_RS03040	231	-	60	25.4353	110.109
NZ_CP081489.1	4490298	4490433	gene-K5T46_RS21780	135	+	35	14.8373	109.906
NZ_CP081489.1	2187734	2190071	gene-K5T46_RS10410	2337	-	604	256.049	109.563
NZ_CP081489.1	1336651	1336822	gene-K5T46_RS06415	171	+	44	18.6525	109.079
NZ_CP081489.1	2729780	2730395	gene-K5T46_RS13080	615	-	158	66.9796	108.91
NZ_CP081489.1	3258152	3258884	gene-K5T46_RS15550	732	+	188	79.6973	108.876
NZ_CP081489.1	3462475	3463219	gene-K5T46_RS16585	744	+	191	80.969	108.829
NZ_CP081489.1	1621003	1621405	gene-K5T46_RS07710	402	+	103	43.6639	108.617
NZ_CP081489.1	3519461	3519602	gene-K5T46_RS16840	141	+	36	15.2612	108.235
NZ_CP081489.1	3492787	3493927	gene-K5T46_RS16705	1140	+	290	122.937	107.84
NZ_CP081489.1	3717286	3717400	gene-K5T46_RS17755	114	+	29	12.2937	107.84
NZ_CP081489.1	2094511	2094979	gene-K5T46_RS09890	468	+	119	50.4467	107.792
NZ_CP081489.1	266392	267217	gene-K5T46_RS01275	825	+	209	88.5996	107.393
NZ_CP081489.1	4043464	4044442	gene-K5T46_RS19400	978	-	247	104.709	107.064
NZ_CP081489.1	2702447	2704481	gene-K5T46_RS12945	2034	-	512	217.048	106.71
NZ_CP081489.1	300741	301338	gene-K5T46_RS01430	597	+	150	63.5882	106.513
NZ_CP081489.1	438357	439632	gene-K5T46_RS02040	1275	-	319	135.231	106.064
NZ_CP081489.1	2500833	2501193	gene-K5T46_RS11965	360	+	90	38.1529	105.98
NZ_CP081489.1	668003	668462	gene-K5T46_RS03185	459	+	114	48.3271	105.288
NZ_CP081489.1	4485938	4487030	gene-K5T46_RS21745	1092	-	271	114.883	105.204
NZ_CP081489.1	3366566	3366965	gene-K5T46_RS16060	399	+	99	41.9682	105.184
NZ_CP081489.1	2430460	2431441	gene-K5T46_RS11590	981	+	243	103.013	105.008
NZ_CP081489.1	3835027	3835648	gene-K5T46_RS18390	621	+	153	64.86	104.444
NZ_CP081489.1	792936	793806	gene-K5T46_RS03735	870	-	214	90.7192	104.275
NZ_CP081489.1	448090	448330	gene-K5T46_RS02095	240	-	59	25.0114	104.214
NZ_CP081489.1	2961209	2961563	gene-K5T46_RS14160	354	-	87	36.8812	104.184
NZ_CP081489.1	317628	317991	gene-K5T46_RS01515	363	-	89	37.729	103.937
NZ_CP081489.1	3645041	3645365	gene-K5T46_RS17445	324	-	79	33.4898	103.364
NZ_CP081489.1	575686	576445	gene-K5T46_RS02715	759	-	185	78.4255	103.327
NZ_CP081489.1	359198	360965	gene-K5T46_RS01685	1767	-	429	181.862	102.922
NZ_CP081489.1	3204397	3204595	gene-K5T46_RS15285	198	-	48	20.3482	102.769
NZ_CP081489.1	2810748	2811066	gene-K5T46_RS13415	318	+	77	32.642	102.648
NZ_CP081489.1	1353716	1354076	gene-K5T46_RS06480	360	-	87	36.8812	102.448
NZ_CP081489.1	4337745	4338396	gene-K5T46_RS20930	651	-	157	66.5557	102.236
NZ_CP081489.1	3750320	3750461	gene-K5T46_RS17910	141	+	34	14.4133	102.222
NZ_CP081489.1	2920345	2921992	gene-K5T46_RS13970	1647	-	397	168.297	102.184
NZ_CP081489.1	1747653	1748400	gene-K5T46_RS08300	747	+	180	76.3059	102.15
NZ_CP081489.1	2062958	2063228	gene-K5T46_RS09740	270	-	65	27.5549	102.055
NZ_CP081489.1	1365335	1367069	gene-K5T46_RS06525	1734	+	417	176.775	101.947
NZ_CP081489.1	877144	877714	gene-K5T46_RS04135	570	-	137	58.0773	101.89
NZ_CP081489.1	879890	880124	gene-K5T46_RS04155	234	+	56	23.7396	101.451
NZ_CP081489.1	4062804	4063152	gene-K5T46_RS19495	348	-	83	35.1855	101.108
NZ_CP081489.1	2915309	2915645	gene-K5T46_RS13945	336	-	80	33.9137	100.934
NZ_CP081489.1	3290056	3290275	gene-K5T46_RS15690	219	+	52	22.0439	100.657
NZ_CP081489.1	3592480	3592687	gene-K5T46_RS17195	207	+	49	20.7722	100.349
NZ_CP081489.1	3616058	3616130	gene-K5T46_RS17300	72	+	17	7.20667	100.093
NZ_CP081489.1	3837193	3837562	gene-K5T46_RS18405	369	+	87	36.8812	99.949
NZ_CP081489.1	521021	521378	gene-K5T46_RS02445	357	-	84	35.6094	99.7462
NZ_CP081489.1	3984283	3985036	gene-K5T46_RS19115	753	-	177	75.0341	99.6469
NZ_CP081489.1	2729563	2729776	gene-K5T46_RS13075	213	-	50	21.1961	99.5121
NZ_CP081489.1	4089729	4090722	gene-K5T46_RS19645	993	-	233	98.7737	99.47
NZ_CP081489.1	2306129	2306351	gene-K5T46_RS11000	222	-	52	22.0439	99.2969
NZ_CP081489.1	3046547	3047192	gene-K5T46_RS14530	645	+	151	64.0122	99.2437
NZ_CP081489.1	1202977	1203379	gene-K5T46_RS05770	402	-	94	39.8486	99.1259
NZ_CP081489.1	3555575	3556616	gene-K5T46_RS17000	1041	-	243	103.013	98.9558
NZ_CP081489.1	1748787	1749888	gene-K5T46_RS08305	1101	+	257	108.948	98.9535
NZ_CP081489.1	2876606	2876753	gene-K5T46_RS13695	147	-	34	14.4133	98.0499
NZ_CP081489.1	718691	719396	gene-K5T46_RS03385	705	-	163	69.0992	98.0131
NZ_CP081489.1	3645381	3645768	gene-K5T46_RS17450	387	-	88	37.3051	96.3956
NZ_CP081489.1	3595664	3595739	gene-K5T46_RS17220	75	+	17	7.20667	96.0889
NZ_CP081489.1	3064430	3065348	gene-K5T46_RS14605	918	-	208	88.1757	96.0519
NZ_CP081489.1	696611	697151	gene-K5T46_RS03310	540	-	122	51.7184	95.7749
NZ_CP081489.1	4134399	4134780	gene-K5T46_RS19880	381	+	86	36.4573	95.6883
NZ_CP081489.1	3287232	3287763	gene-K5T46_RS15675	531	-	119	50.4467	95.0031
NZ_CP081489.1	4328065	4330717	gene-K5T46_RS20840	2652	+	590	250.114	94.3114
NZ_CP081489.1	82574	82889	gene-K5T46_RS00385	315	+	70	29.6745	94.2048
NZ_CP081489.1	544084	544912	gene-K5T46_RS02565	828	+	184	78.0016	94.2048
NZ_CP081489.1	1004746	1004845	gene-K5T46_RS04785	99	-	22	9.32627	94.2048
NZ_CP081489.1	4125384	4125960	gene-K5T46_RS19830	576	+	128	54.262	94.2048
NZ_CP081489.1	967189	967284	gene-K5T46_RS04610	95	+	21	8.90235	93.709
NZ_CP081489.1	1404011	1404611	gene-K5T46_RS06700	600	+	132	55.9576	93.2627
NZ_CP081489.1	1776366	1776657	gene-K5T46_RS08435	291	+	64	27.131	93.2336
NZ_CP081489.1	81311	81644	gene-K5T46_RS00375	333	-	73	30.9463	92.9318
NZ_CP081489.1	1086988	1087093	gene-K5T46_RS05195	105	-	23	9.7502	92.859
NZ_CP081489.1	77680	77977	gene-K5T46_RS00350	297	-	65	27.5549	92.7774
NZ_CP081489.1	3160686	3161766	gene-K5T46_RS15070	1080	-	236	100.045	92.6347
NZ_CP081489.1	3451339	3451600	gene-K5T46_RS16520	261	-	57	24.1635	92.5806
NZ_CP081489.1	1816579	1817161	gene-K5T46_RS08650	582	+	127	53.838	92.5052
NZ_CP081489.1	2576122	2577373	gene-K5T46_RS12360	1251	-	272	115.307	92.1716
NZ_CP081489.1	2915773	2916493	gene-K5T46_RS13950	720	+	156	66.1318	91.8497
NZ_CP081489.1	2148428	2149358	gene-K5T46_RS10165	930	-	201	85.2082	91.6218
NZ_CP081489.1	1122284	1122335	gene-K5T46_RS05375	51	-	11	4.66314	91.4341
NZ_CP081489.1	1211559	1212840	gene-K5T46_RS05810	1281	-	276	117.002	91.3367
NZ_CP081489.1	4039499	4040081	gene-K5T46_RS19385	582	-	125	52.9902	91.0484
NZ_CP081489.1	429796	430015	gene-K5T46_RS01985	219	-	47	19.9243	90.9786
NZ_CP081489.1	3140948	3141746	gene-K5T46_RS15000	798	+	171	72.4906	90.8403
NZ_CP081489.1	2672176	2672788	gene-K5T46_RS12805	612	+	131	55.5337	90.7414
NZ_CP081489.1	99835	100036	gene-K5T46_RS00475	201	-	43	18.2286	90.6897
NZ_CP081489.1	3723827	3724178	gene-K5T46_RS17780	351	-	75	31.7941	90.5815
NZ_CP081489.1	4291755	4291995	gene-K5T46_RS20690	240	+	51	21.62	90.0833
NZ_CP081489.1	4068624	4069218	gene-K5T46_RS19530	594	-	126	53.4141	89.9228
NZ_CP081489.1	620945	621584	gene-K5T46_RS02925	639	-	135	57.2294	89.5609
NZ_CP081489.1	869130	869889	gene-K5T46_RS04085	759	-	160	67.8274	89.3642
NZ_CP081489.1	123675	123751	gene-K5T46_RS00585	76	+	16	6.78274	89.2466
NZ_CP081489.1	2458255	2458369	gene-K5T46_RS11745	114	-	24	10.1741	89.2466
NZ_CP081489.1	952388	952664	gene-K5T46_RS04560	276	+	58	24.5875	89.085
NZ_CP081489.1	2207931	2208360	gene-K5T46_RS10490	429	-	90	38.1529	88.9346
NZ_CP081489.1	242759	243719	gene-K5T46_RS01180	960	-	201	85.2082	88.7586
NZ_CP081489.1	3295385	3296417	gene-K5T46_RS15710	1032	+	216	91.5671	88.7278
NZ_CP081489.1	3837572	3837998	gene-K5T46_RS18410	426	+	89	37.729	88.5658
NZ_CP081489.1	4064558	4064807	gene-K5T46_RS19510	249	-	52	22.0439	88.5298
NZ_CP081489.1	3252399	3253899	gene-K5T46_RS15530	1500	-	313	132.687	88.4583
NZ_CP081489.1	2162045	2163980	gene-K5T46_RS10250	1935	-	403	170.84	88.2896
NZ_CP081489.1	1782144	1782519	gene-K5T46_RS08470	375	+	78	33.0659	88.1757
NZ_CP081489.1	2575053	2575164	gene-K5T46_RS12345	111	+	23	9.7502	87.8396
NZ_CP081489.1	4458181	4458370	gene-K5T46_RS21595	189	+	39	16.5329	87.4759
NZ_CP081489.1	2794032	2795685	gene-K5T46_RS13325	1653	+	341	144.557	87.4515
NZ_CP081489.1	978732	978888	gene-K5T46_RS04660	156	-	32	13.5655	86.9583
NZ_CP081489.1	54572	55691	gene-K5T46_RS00245	1119	-	229	97.078	86.7543
NZ_CP081489.1	888349	889156	gene-K5T46_RS04210	807	-	165	69.9471	86.6754
NZ_CP081489.1	4216636	4217008	gene-K5T46_RS20295	372	+	76	32.218	86.6076
NZ_CP081489.1	3167426	3167756	gene-K5T46_RS15120	330	-	67	28.4027	86.0689
NZ_CP081489.1	2868727	2870152	gene-K5T46_RS13655	1425	+	289	122.513	85.9743
NZ_CP081489.1	3645795	3647010	gene-K5T46_RS17455	1215	-	246	104.285	85.831
NZ_CP081489.1	4028318	4029272	gene-K5T46_RS19325	954	-	193	81.8169	85.7619
NZ_CP081489.1	4304906	4305173	gene-K5T46_RS20760	267	-	54	22.8918	85.7369
NZ_CP081489.1	1882921	1883635	gene-K5T46_RS08960	714	-	144	61.0447	85.4968
NZ_CP081489.1	357724	359212	gene-K5T46_RS01680	1488	-	300	127.176	85.4681
NZ_CP081489.1	2625355	2626249	gene-K5T46_RS12590	894	+	179	75.882	84.8791
NZ_CP081489.1	1585553	1586567	gene-K5T46_RS07560	1014	-	203	86.0561	84.8679
NZ_CP081489.1	4098240	4098690	gene-K5T46_RS19690	450	-	90	38.1529	84.7843
NZ_CP081489.1	3705731	3707201	gene-K5T46_RS17710	1470	-	293	124.209	84.4959
NZ_CP081489.1	517185	519573	gene-K5T46_RS02430	2388	-	475	201.363	84.3228
NZ_CP081489.1	3017755	3018214	gene-K5T46_RS14395	459	+	91	38.5769	84.0454
NZ_CP081489.1	3454256	3454826	gene-K5T46_RS16545	570	+	113	47.9031	84.0406
NZ_CP081489.1	2096830	2097007	gene-K5T46_RS09910	177	-	35	14.8373	83.8263
NZ_CP081489.1	420396	421545	gene-K5T46_RS01945	1149	-	227	96.2302	83.7513
NZ_CP081489.1	4473936	4474170	gene-K5T46_RS21680	234	-	46	19.5004	83.335
NZ_CP081489.1	2836123	2836705	gene-K5T46_RS13515	582	+	114	48.3271	83.0362
NZ_CP081489.1	4309337	4310471	gene-K5T46_RS20770	1134	+	222	94.1106	82.9899
NZ_CP081489.1	123044	123551	gene-K5T46_RS00580	507	-	99	41.9682	82.7776
NZ_CP081489.1	291726	292182	gene-K5T46_RS01385	456	+	89	37.729	82.7391
NZ_CP081489.1	2616323	2616779	gene-K5T46_RS12545	456	-	89	37.729	82.7391
NZ_CP081489.1	2957189	2957507	gene-K5T46_RS14130	318	-	62	26.2831	82.6514
NZ_CP081489.1	210649	211153	gene-K5T46_RS01020	504	-	98	41.5443	82.4292
NZ_CP081489.1	4335952	4336096	gene-K5T46_RS20905	144	-	28	11.8698	82.4292
NZ_CP081489.1	2258426	2258771	gene-K5T46_RS10745	345	-	67	28.4027	82.3268
NZ_CP081489.1	55	751	gene-K5T46_RS00005	696	-	135	57.2294	82.2262
NZ_CP081489.1	1262647	1263169	gene-K5T46_RS06020	522	+	101	42.8161	82.0231
NZ_CP081489.1	678548	679067	gene-K5T46_RS03230	519	+	100	42.3922	81.6805
NZ_CP081489.1	2935846	2936848	gene-K5T46_RS14025	1002	+	193	81.8169	81.6536
NZ_CP081489.1	4203120	4203333	gene-K5T46_RS20235	213	-	41	17.3808	81.5999
NZ_CP081489.1	2560735	2561104	gene-K5T46_RS12245	369	-	71	30.0984	81.5676
NZ_CP081489.1	363345	364350	gene-K5T46_RS01705	1005	-	193	81.8169	81.4098
NZ_CP081489.1	4460644	4461349	gene-K5T46_RS21615	705	+	135	57.2294	81.1765
NZ_CP081489.1	2286931	2287438	gene-K5T46_RS10915	507	+	97	41.1204	81.1053
NZ_CP081489.1	3256252	3257671	gene-K5T46_RS15540	1419	+	271	114.883	80.9604
NZ_CP081489.1	2906434	2906764	gene-K5T46_RS13900	330	-	63	26.7071	80.9305
NZ_CP081489.1	3237410	3238301	gene-K5T46_RS15460	891	-	170	72.0667	80.8829
NZ_CP081489.1	1103201	1103327	gene-K5T46_RS05290	126	-	24	10.1741	80.747
NZ_CP081489.1	2185011	2185284	gene-K5T46_RS10390	273	+	52	22.0439	80.747
NZ_CP081489.1	3325563	3326082	gene-K5T46_RS15855	519	-	98	41.5443	80.0468
NZ_CP081489.1	3754370	3755303	gene-K5T46_RS17930	933	+	176	74.6102	79.9681
NZ_CP081489.1	2652930	2653755	gene-K5T46_RS12730	825	-	155	65.7078	79.6459
NZ_CP081489.1	506363	508742	gene-K5T46_RS02375	2379	-	446	189.069	79.4742
NZ_CP081489.1	995821	997588	gene-K5T46_RS04750	1767	+	330	139.894	79.1704
NZ_CP081489.1	2900958	2902179	gene-K5T46_RS13865	1221	-	228	96.6541	79.1598
NZ_CP081489.1	3791239	3792937	gene-K5T46_RS18100	1698	-	317	134.383	79.142
NZ_CP081489.1	219427	221563	gene-K5T46_RS01065	2136	-	398	168.721	78.9891
NZ_CP081489.1	3517489	3518312	id-NZ_CP081489.1:3517490..3518312	823	+	153	64.86	78.8092
NZ_CP081489.1	4207796	4208420	gene-K5T46_RS20260	624	-	116	49.1749	78.8059
NZ_CP081489.1	807111	807816	gene-K5T46_RS03805	705	+	131	55.5337	78.7712
NZ_CP081489.1	3309748	3311740	gene-K5T46_RS15775	1992	+	370	156.851	78.7404
NZ_CP081489.1	2215245	2215509	gene-K5T46_RS10525	264	+	49	20.7722	78.6824
NZ_CP081489.1	2570707	2570956	gene-K5T46_RS12310	249	-	46	19.5004	78.3148
NZ_CP081489.1	3564949	3566098	gene-K5T46_RS17070	1149	-	212	89.8714	78.217
NZ_CP081489.1	768	2145	gene-K5T46_RS00010	1377	-	254	107.676	78.1961
NZ_CP081489.1	2340451	2340592	gene-K5T46_RS11190	141	-	26	11.022	78.1699
NZ_CP081489.1	1422866	1424261	gene-K5T46_RS06795	1395	-	257	108.948	78.0988
NZ_CP081489.1	2660734	2662879	gene-K5T46_RS12770	2145	-	394	167.025	77.8672
NZ_CP081489.1	4323307	4324204	gene-K5T46_RS20820	897	-	164	69.5231	77.5063
NZ_CP081489.1	3410361	3411888	gene-K5T46_RS16300	1527	-	279	118.274	77.4552
NZ_CP081489.1	3838268	3838679	gene-K5T46_RS18420	411	-	75	31.7941	77.3579
NZ_CP081489.1	381112	381991	gene-K5T46_RS01795	879	-	160	67.8274	77.1643
NZ_CP081489.1	1018755	1019184	gene-K5T46_RS04860	429	-	78	33.0659	77.0766
NZ_CP081489.1	3371662	3371992	gene-K5T46_RS16090	330	+	60	25.4353	77.0766
NZ_CP081489.1	3239223	3239742	gene-K5T46_RS15470	519	+	94	39.8486	76.7796
NZ_CP081489.1	1355056	1356457	gene-K5T46_RS06490	1401	+	253	107.252	76.554
NZ_CP081489.1	898852	899140	gene-K5T46_RS04285	288	+	52	22.0439	76.5414
NZ_CP081489.1	643946	644135	gene-K5T46_RS03045	189	-	34	14.4133	76.261
NZ_CP081489.1	3028739	3029291	gene-K5T46_RS14455	552	-	99	41.9682	76.0294
NZ_CP081489.1	3002374	3003877	gene-K5T46_RS14335	1503	-	269	114.035	75.8715
NZ_CP081489.1	2179881	2180457	gene-K5T46_RS10355	576	+	103	43.6639	75.8054
NZ_CP081489.1	2687698	2688370	gene-K5T46_RS12870	672	+	120	50.8706	75.7003
NZ_CP081489.1	3603514	3607108	gene-K5T46_RS17255	3594	+	641	271.734	75.6076
NZ_CP081489.1	2796016	2796403	gene-K5T46_RS13335	387	+	69	29.2506	75.5829
NZ_CP081489.1	355293	356376	gene-K5T46_RS01670	1083	-	193	81.8169	75.5465
NZ_CP081489.1	4472238	4472817	gene-K5T46_RS21665	579	+	103	43.6639	75.4126
NZ_CP081489.1	459938	460028	gene-K5T46_RS02145	90	-	16	6.78274	75.3638
NZ_CP081489.1	1036779	1037139	gene-K5T46_RS04955	360	+	64	27.131	75.3638
NZ_CP081489.1	2174301	2174937	gene-K5T46_RS10320	636	-	113	47.9031	75.3194
NZ_CP081489.1	1066121	1067492	gene-K5T46_RS05090	1371	-	243	103.013	75.1371
NZ_CP081489.1	2559696	2559990	gene-K5T46_RS12235	294	-	52	22.0439	74.9793
NZ_CP081489.1	2907527	2908562	gene-K5T46_RS13915	1035	+	183	77.5776	74.9542
NZ_CP081489.1	3499343	3500135	gene-K5T46_RS16750	792	+	140	59.349	74.9356
NZ_CP081489.1	3387480	3387939	gene-K5T46_RS16160	459	+	81	34.3376	74.8097
NZ_CP081489.1	2662878	2664189	gene-K5T46_RS12775	1311	-	231	97.9259	74.6956
NZ_CP081489.1	100304	100934	gene-K5T46_RS00480	630	+	111	47.0553	74.6909
NZ_CP081489.1	2405801	2406011	gene-K5T46_RS11485	210	-	37	15.6851	74.6909
NZ_CP081489.1	2890361	2891072	gene-K5T46_RS13820	711	-	125	52.9902	74.5291
NZ_CP081489.1	3404408	3405509	gene-K5T46_RS16245	1101	+	191	80.969	73.5413
NZ_CP081489.1	600464	600539	gene-K5T46_RS02845	75	+	13	5.51098	73.4797
NZ_CP081489.1	463895	465044	gene-K5T46_RS02165	1149	+	198	83.9365	73.0518
NZ_CP081489.1	227948	228401	gene-K5T46_RS01095	453	-	78	33.0659	72.9931
NZ_CP081489.1	961424	963134	gene-K5T46_RS04595	1710	+	293	124.209	72.6369
NZ_CP081489.1	4432746	4433793	gene-K5T46_RS21460	1047	-	179	75.882	72.4756
NZ_CP081489.1	2711616	2712336	gene-K5T46_RS12980	720	-	123	52.1424	72.4199
NZ_CP081489.1	1210214	1211474	gene-K5T46_RS05805	1260	-	215	91.1431	72.3358
NZ_CP081489.1	757799	761828	gene-K5T46_RS03550	4029	-	687	291.234	72.2845
NZ_CP081489.1	1151258	1152632	gene-K5T46_RS05510	1374	-	234	99.1976	72.1962
NZ_CP081489.1	4371694	4372258	gene-K5T46_RS21130	564	-	96	40.6965	72.1569
NZ_CP081489.1	993807	994260	gene-K5T46_RS04740	453	-	77	32.642	72.0573
NZ_CP081489.1	362285	362744	gene-K5T46_RS01700	459	-	78	33.0659	72.039
NZ_CP081489.1	185425	185890	gene-K5T46_RS00880	465	+	79	33.4898	72.0211
NZ_CP081489.1	4193975	4194317	gene-K5T46_RS20170	342	-	58	24.5875	71.8931
NZ_CP081489.1	351666	352734	gene-K5T46_RS01655	1068	-	181	76.7298	71.8444
NZ_CP081489.1	3351617	3352526	gene-K5T46_RS15970	909	-	154	65.2839	71.8195
NZ_CP081489.1	1536493	1536694	gene-K5T46_RS07330	201	+	34	14.4133	71.7081
NZ_CP081489.1	251979	254412	gene-K5T46_RS01220	2433	-	411	174.232	71.6119
NZ_CP081489.1	3254368	3256144	gene-K5T46_RS15535	1776	+	300	127.176	71.6084
NZ_CP081489.1	4433792	4435172	gene-K5T46_RS21465	1380	-	233	98.7737	71.5752
NZ_CP081489.1	2571363	2571636	gene-K5T46_RS12320	273	-	46	19.5004	71.43
NZ_CP081489.1	4056220	4056345	id-NZ_CP081489.1:4056221..4056345	125	+	21	8.90235	71.2188
NZ_CP081489.1	3115701	3116469	gene-K5T46_RS14860	768	-	129	54.6859	71.2056
NZ_CP081489.1	3563720	3564941	gene-K5T46_RS17065	1221	-	205	86.9039	71.1744
NZ_CP081489.1	3335405	3336533	gene-K5T46_RS15915	1128	-	189	80.1212	71.0294
NZ_CP081489.1	2939961	2940540	gene-K5T46_RS14055	579	+	97	41.1204	71.0197
NZ_CP081489.1	450246	450654	gene-K5T46_RS02110	408	+	68	28.8267	70.6536
NZ_CP081489.1	1387205	1387523	gene-K5T46_RS06605	318	+	53	22.4678	70.6536
NZ_CP081489.1	2448283	2449819	gene-K5T46_RS11700	1536	+	256	108.524	70.6536
NZ_CP081489.1	2687276	2687552	gene-K5T46_RS12865	276	-	46	19.5004	70.6536
NZ_CP081489.1	570426	572283	gene-K5T46_RS02695	1857	+	309	130.992	70.5395
NZ_CP081489.1	867881	869084	gene-K5T46_RS04080	1203	+	200	84.7843	70.4774
NZ_CP081489.1	970619	971690	gene-K5T46_RS04625	1071	-	178	75.458	70.4557
NZ_CP081489.1	3562920	3563673	gene-K5T46_RS17060	753	-	124	52.5663	69.8091
NZ_CP081489.1	2439244	2439736	gene-K5T46_RS11640	492	+	81	34.3376	69.792
NZ_CP081489.1	769742	769961	gene-K5T46_RS03605	219	-	36	15.2612	69.6857
NZ_CP081489.1	770946	771153	gene-K5T46_RS03615	207	+	34	14.4133	69.6296
NZ_CP081489.1	3935123	3935696	gene-K5T46_RS18900	573	+	94	39.8486	69.5439
NZ_CP081489.1	2208578	2209706	gene-K5T46_RS10495	1128	-	185	78.4255	69.5261
NZ_CP081489.1	3363588	3364095	gene-K5T46_RS16035	507	+	83	35.1855	69.3994
NZ_CP081489.1	4100824	4100983	gene-K5T46_RS19710	159	+	26	11.022	69.3205
NZ_CP081489.1	1050316	1050904	gene-K5T46_RS05025	588	+	96	40.6965	69.2117
NZ_CP081489.1	2557320	2558221	gene-K5T46_RS12220	901	+	147	62.3165	69.1637
NZ_CP081489.1	569714	570266	gene-K5T46_RS02690	552	-	90	38.1529	69.1176
NZ_CP081489.1	3455021	3455297	gene-K5T46_RS16550	276	+	45	19.0765	69.1176
NZ_CP081489.1	1475977	1476505	gene-K5T46_RS07020	528	+	86	36.4573	69.0478
NZ_CP081489.1	1797013	1797805	gene-K5T46_RS08540	792	+	129	54.6859	69.0478
NZ_CP081489.1	2908586	2909975	gene-K5T46_RS13920	1389	-	226	95.8063	68.975
NZ_CP081489.1	3317496	3317988	gene-K5T46_RS15815	492	-	80	33.9137	68.9303
NZ_CP081489.1	3403055	3403751	gene-K5T46_RS16235	696	-	113	47.9031	68.8263
NZ_CP081489.1	3851233	3852157	gene-K5T46_RS18505	924	-	150	63.5882	68.8184
NZ_CP081489.1	3260434	3261352	gene-K5T46_RS15565	918	-	149	63.1643	68.8064
NZ_CP081489.1	4232595	4232799	gene-K5T46_RS20385	204	+	33	13.9894	68.5755
NZ_CP081489.1	4330736	4331648	gene-K5T46_RS20845	912	-	147	62.3165	68.3295
NZ_CP081489.1	1403470	1403911	gene-K5T46_RS06695	441	-	71	30.0984	68.2504
NZ_CP081489.1	1719736	1719823	gene-K5T46_RS08160	87	+	14	5.9349	68.2173
NZ_CP081489.1	2805837	2807049	gene-K5T46_RS13390	1212	+	195	82.6647	68.2052
NZ_CP081489.1	591975	593451	gene-K5T46_RS02790	1476	+	237	100.469	68.0687
NZ_CP081489.1	4476468	4477826	gene-K5T46_RS21695	1358	+	217	91.991	67.74
NZ_CP081489.1	924411	926070	gene-K5T46_RS04415	1659	+	265	112.339	67.715
NZ_CP081489.1	3250388	3251339	gene-K5T46_RS15520	951	-	151	64.0122	67.3104
NZ_CP081489.1	1402504	1402933	gene-K5T46_RS06685	429	-	68	28.8267	67.195
NZ_CP081489.1	701784	704397	gene-K5T46_RS03340	2613	-	414	175.504	67.1655
NZ_CP081489.1	2904615	2904735	gene-K5T46_RS13880	120	-	19	8.05451	67.1209
NZ_CP081489.1	1882394	1882811	gene-K5T46_RS08955	417	-	66	27.9788	67.0955
NZ_CP081489.1	3004140	3005019	gene-K5T46_RS14340	879	-	139	58.9251	67.0365
NZ_CP081489.1	2825015	2825072	gene-K5T46_RS13465	57	+	9	3.81529	66.935
NZ_CP081489.1	4456313	4457264	gene-K5T46_RS21570	951	-	150	63.5882	66.8646
NZ_CP081489.1	563452	563725	gene-K5T46_RS02665	273	-	43	18.2286	66.7715
NZ_CP081489.1	4292041	4292473	gene-K5T46_RS20695	432	+	68	28.8267	66.7284
NZ_CP081489.1	4439398	4440358	gene-K5T46_RS21490	960	+	151	64.0122	66.6793
NZ_CP081489.1	1435700	1436336	gene-K5T46_RS06840	636	+	100	42.3922	66.6543
NZ_CP081489.1	2437827	2438565	gene-K5T46_RS11630	738	+	116	49.1749	66.6327
NZ_CP081489.1	3313759	3314071	gene-K5T46_RS15795	312	+	49	20.7722	66.5774
NZ_CP081489.1	3715474	3717097	gene-K5T46_RS17750	1623	+	254	107.676	66.3439
NZ_CP081489.1	1163794	1165528	gene-K5T46_RS05555	1734	-	271	114.883	66.253
NZ_CP081489.1	2490887	2492129	gene-K5T46_RS11925	1242	+	194	82.2408	66.2164
NZ_CP081489.1	4332139	4332421	gene-K5T46_RS20860	282	-	44	18.6525	66.1438
NZ_CP081489.1	811857	812268	gene-K5T46_RS03830	411	+	64	27.131	66.0121
NZ_CP081489.1	2267908	2268892	gene-K5T46_RS10820	984	-	153	64.86	65.9146
NZ_CP081489.1	1610196	1610718	gene-K5T46_RS07660	522	-	81	34.3376	65.7809
NZ_CP081489.1	3744359	3745229	gene-K5T46_RS17880	870	-	135	57.2294	65.7809
NZ_CP081489.1	185090	185426	gene-K5T46_RS00875	336	+	52	22.0439	65.6069
NZ_CP081489.1	2452755	2453130	gene-K5T46_RS11715	375	-	58	24.5875	65.5665
NZ_CP081489.1	4346372	4347479	gene-K5T46_RS20990	1107	+	171	72.4906	65.4838
NZ_CP081489.1	2395378	2395948	gene-K5T46_RS11435	570	+	88	37.3051	65.4475
NZ_CP081489.1	840410	840878	gene-K5T46_RS03970	468	+	72	30.5224	65.2187
NZ_CP081489.1	3189384	3190749	gene-K5T46_RS15235	1365	-	210	89.0235	65.2187
NZ_CP081489.1	3330657	3331542	gene-K5T46_RS15890	885	+	136	57.6533	65.145
NZ_CP081489.1	425494	425989	gene-K5T46_RS01970	495	-	76	32.218	65.0869
NZ_CP081489.1	4480479	4481684	gene-K5T46_RS21715	1205	-	185	78.4255	65.0834
NZ_CP081489.1	706033	707434	gene-K5T46_RS03350	1401	+	215	91.1431	65.0558
NZ_CP081489.1	2574596	2575001	gene-K5T46_RS12340	405	+	62	26.2831	64.8966
NZ_CP081489.1	4482397	4482724	gene-K5T46_RS21725	327	+	50	21.1961	64.8198
NZ_CP081489.1	546766	547252	gene-K5T46_RS02580	486	-	74	31.3702	64.5477
NZ_CP081489.1	1437591	1437834	gene-K5T46_RS06850	243	-	37	15.6851	64.5477
NZ_CP081489.1	3057590	3057932	gene-K5T46_RS14575	342	+	52	22.0439	64.4559
NZ_CP081489.1	973267	975649	gene-K5T46_RS04635	2382	+	362	153.46	64.4247
NZ_CP081489.1	2340910	2341885	gene-K5T46_RS11195	975	-	148	62.7404	64.3491
NZ_CP081489.1	4336064	4336229	gene-K5T46_RS20910	165	-	25	10.598	64.2305
NZ_CP081489.1	3828553	3828925	gene-K5T46_RS18320	372	+	56	23.7396	63.8161
NZ_CP081489.1	1073241	1073481	gene-K5T46_RS05125	240	-	36	15.2612	63.5882
NZ_CP081489.1	3362777	3362957	gene-K5T46_RS16025	180	+	27	11.4459	63.5882
NZ_CP081489.1	4472872	4472932	gene-K5T46_RS21670	60	+	9	3.81529	63.5882
NZ_CP081489.1	4126642	4127599	gene-K5T46_RS19840	957	+	143	60.6208	63.3446
NZ_CP081489.1	4133668	4134400	gene-K5T46_RS19875	732	+	109	46.2074	63.1249
NZ_CP081489.1	2153876	2154716	gene-K5T46_RS10200	840	+	125	52.9902	63.0836
NZ_CP081489.1	326697	329361	gene-K5T46_RS01540	2664	-	395	167.449	62.8562
NZ_CP081489.1	2979655	2981173	gene-K5T46_RS14235	1518	+	225	95.3823	62.8342
NZ_CP081489.1	1135856	1135991	gene-K5T46_RS05440	135	+	20	8.47843	62.8032
NZ_CP081489.1	1334357	1335275	gene-K5T46_RS06395	918	+	136	57.6533	62.8032
NZ_CP081489.1	3001097	3002198	gene-K5T46_RS14325	1101	+	163	69.0992	62.7604
NZ_CP081489.1	154846	155623	gene-K5T46_RS00710	777	+	115	48.751	62.7426
NZ_CP081489.1	2704609	2705197	gene-K5T46_RS12950	588	+	87	36.8812	62.7231
NZ_CP081489.1	2571678	2571915	gene-K5T46_RS12325	237	-	35	14.8373	62.6044
NZ_CP081489.1	969178	970222	gene-K5T46_RS04620	1044	+	154	65.2839	62.5325
NZ_CP081489.1	616943	620906	gene-K5T46_RS02920	3963	+	584	247.57	62.4704
NZ_CP081489.1	91982	92756	gene-K5T46_RS00435	774	+	114	48.3271	62.4381
NZ_CP081489.1	3877348	3878014	gene-K5T46_RS18650	666	+	98	41.5443	62.3788
NZ_CP081489.1	1719937	1720189	gene-K5T46_RS08165	252	+	37	15.6851	62.2425
NZ_CP081489.1	4274686	4275340	gene-K5T46_RS20595	654	-	96	40.6965	62.227
NZ_CP081489.1	2571068	2571335	gene-K5T46_RS12315	267	-	39	16.5329	61.9211
NZ_CP081489.1	2001702	2002401	gene-K5T46_RS09445	699	+	102	43.24	61.8598
NZ_CP081489.1	1765478	1766801	gene-K5T46_RS08395	1323	+	193	81.8169	61.8419
NZ_CP081489.1	500019	500931	gene-K5T46_RS02345	912	-	133	56.3816	61.8219
NZ_CP081489.1	3648152	3648893	gene-K5T46_RS17465	741	-	108	45.7835	61.7861
NZ_CP081489.1	3547273	3547630	gene-K5T46_RS16960	357	-	52	22.0439	61.7477
NZ_CP081489.1	318165	320763	gene-K5T46_RS01520	2598	-	378	160.242	61.6791
NZ_CP081489.1	1113252	1113816	gene-K5T46_RS05335	564	-	82	34.7616	61.634
NZ_CP081489.1	3574281	3574812	gene-K5T46_RS17110	531	-	77	32.642	61.4726
NZ_CP081489.1	1989421	1990090	gene-K5T46_RS09395	669	-	97	41.1204	61.4655
NZ_CP081489.1	228936	229509	gene-K5T46_RS01100	573	-	83	35.1855	61.4057
NZ_CP081489.1	211146	211671	gene-K5T46_RS01025	525	-	76	32.218	61.3677
NZ_CP081489.1	2721049	2721277	gene-K5T46_RS13035	228	-	33	13.9894	61.3571
NZ_CP081489.1	238214	238415	gene-K5T46_RS01155	201	+	29	12.2937	61.1628
NZ_CP081489.1	2883135	2883336	gene-K5T46_RS13765	201	-	29	12.2937	61.1628
NZ_CP081489.1	599305	600331	gene-K5T46_RS02835	1026	+	148	62.7404	61.1505
NZ_CP081489.1	2426023	2427049	gene-K5T46_RS11570	1026	-	148	62.7404	61.1505
NZ_CP081489.1	3384247	3385156	gene-K5T46_RS16145	909	-	131	55.5337	61.0932
NZ_CP081489.1	3491203	3492772	gene-K5T46_RS16700	1569	+	226	95.8063	61.062
NZ_CP081489.1	520780	520905	id-NZ_CP081489.1:520781..520905	125	-	18	7.63059	61.0447
NZ_CP081489.1	3312684	3313575	gene-K5T46_RS15790	891	+	128	54.262	60.9001
NZ_CP081489.1	2107754	2108075	gene-K5T46_RS09980	321	+	46	19.5004	60.7489
NZ_CP081489.1	2889422	2889764	gene-K5T46_RS13810	342	+	49	20.7722	60.7373
NZ_CP081489.1	3804445	3804487	gene-K5T46_RS18160	42	-	6	2.54353	60.5602
NZ_CP081489.1	3308779	3309727	gene-K5T46_RS15770	948	+	135	57.2294	60.3686
NZ_CP081489.1	3251412	3252396	gene-K5T46_RS15525	984	-	140	59.349	60.314
NZ_CP081489.1	0	4498411	NZ_CP081489.1:1..4498411	4498411	+	639706	271185	60.2847
NZ_CP081489.1	1073527	1074343	gene-K5T46_RS05130	816	-	116	49.1749	60.2634
NZ_CP081489.1	834485	835232	gene-K5T46_RS03935	747	-	106	44.9357	60.1549
NZ_CP081489.1	2058691	2060185	gene-K5T46_RS09715	1494	-	212	89.8714	60.1549
NZ_CP081489.1	304508	305411	gene-K5T46_RS01450	903	-	128	54.262	60.0908
NZ_CP081489.1	2398976	2399414	gene-K5T46_RS11455	438	+	62	26.2831	60.0072
NZ_CP081489.1	345921	347073	gene-K5T46_RS01630	1152	-	163	69.0992	59.982
NZ_CP081489.1	3547629	3548304	gene-K5T46_RS16965	675	-	95	40.2725	59.663
NZ_CP081489.1	3050934	3052611	gene-K5T46_RS14550	1677	-	236	100.045	59.6574
NZ_CP081489.1	3524995	3525244	gene-K5T46_RS16870	249	-	35	14.8373	59.5874
NZ_CP081489.1	301390	302665	gene-K5T46_RS01435	1275	+	179	75.882	59.5153
NZ_CP081489.1	1678406	1678691	gene-K5T46_RS07940	285	+	40	16.9569	59.4978
NZ_CP081489.1	2825343	2825400	gene-K5T46_RS13470	57	+	8	3.39137	59.4978
NZ_CP081489.1	711394	711943	gene-K5T46_RS03370	549	-	77	32.642	59.4571
NZ_CP081489.1	1019295	1019709	gene-K5T46_RS04865	414	-	58	24.5875	59.39
NZ_CP081489.1	4090779	4091844	gene-K5T46_RS19650	1065	-	149	63.1643	59.3092
NZ_CP081489.1	872470	873286	gene-K5T46_RS04105	816	-	114	48.3271	59.2243
NZ_CP081489.1	2175511	2176294	gene-K5T46_RS10330	783	-	109	46.2074	59.0133
NZ_CP081489.1	1981707	1982943	gene-K5T46_RS09365	1236	+	172	72.9145	58.9923
NZ_CP081489.1	3074614	3077245	gene-K5T46_RS14665	2631	-	366	155.155	58.972
NZ_CP081489.1	2638471	2639284	gene-K5T46_RS12660	813	-	113	47.9031	58.9214
NZ_CP081489.1	3895386	3896300	gene-K5T46_RS18735	914	+	127	53.838	58.9038
NZ_CP081489.1	1979320	1980040	gene-K5T46_RS09350	720	+	100	42.3922	58.878
NZ_CP081489.1	2419894	2420146	gene-K5T46_RS11540	252	-	35	14.8373	58.878
NZ_CP081489.1	3731898	3732618	gene-K5T46_RS17820	720	+	100	42.3922	58.878
NZ_CP081489.1	3875414	3875933	gene-K5T46_RS18640	519	-	72	30.5224	58.8099
NZ_CP081489.1	2787678	2788104	gene-K5T46_RS13295	426	+	59	25.0114	58.7121
NZ_CP081489.1	3953339	3953810	gene-K5T46_RS19015	471	+	65	27.5549	58.503
NZ_CP081489.1	3331718	3332066	gene-K5T46_RS15895	348	-	48	20.3482	58.4719
NZ_CP081489.1	139642	141661	gene-K5T46_RS00645	2019	+	278	117.85	58.3706
NZ_CP081489.1	629000	630242	gene-K5T46_RS02980	1242	-	171	72.4906	58.366
NZ_CP081489.1	4026840	4027044	gene-K5T46_RS19315	204	+	28	11.8698	58.1853
NZ_CP081489.1	1501017	1501593	gene-K5T46_RS07165	576	-	79	33.4898	58.142
NZ_CP081489.1	3484898	3485621	gene-K5T46_RS16685	723	-	99	41.9682	58.0473
NZ_CP081489.1	1394477	1395809	gene-K5T46_RS06645	1332	+	182	77.1537	57.9232
NZ_CP081489.1	2562342	2563155	gene-K5T46_RS12255	813	+	111	47.0553	57.8786
NZ_CP081489.1	300112	300715	gene-K5T46_RS01425	603	+	82	34.7616	57.6477
NZ_CP081489.1	2179318	2179885	gene-K5T46_RS10350	567	+	77	32.642	57.5696
NZ_CP081489.1	4220055	4222500	gene-K5T46_RS20315	2445	-	332	140.742	57.5632
NZ_CP081489.1	2167626	2168799	gene-K5T46_RS10275	1173	-	159	67.4035	57.4625
NZ_CP081489.1	4076143	4077700	gene-K5T46_RS19575	1557	+	211	89.4474	57.4486
NZ_CP081489.1	2422517	2423801	gene-K5T46_RS11555	1284	+	174	73.7624	57.4473
NZ_CP081489.1	2370338	2371187	gene-K5T46_RS11315	849	-	115	48.751	57.4216
NZ_CP081489.1	2552997	2554539	gene-K5T46_RS12200	1542	+	208	88.1757	57.1827
NZ_CP081489.1	3636717	3637110	gene-K5T46_RS17400	393	+	53	22.4678	57.1701
NZ_CP081489.1	1237954	1238533	gene-K5T46_RS05925	579	+	78	33.0659	57.1086
NZ_CP081489.1	1810362	1810941	gene-K5T46_RS08615	579	-	78	33.0659	57.1086
NZ_CP081489.1	3653575	3654466	gene-K5T46_RS17490	891	-	120	50.8706	57.0938
NZ_CP081489.1	3630139	3630466	gene-K5T46_RS17360	327	+	44	18.6525	57.0414
NZ_CP081489.1	3743142	3743664	gene-K5T46_RS17870	522	-	70	29.6745	56.8477
NZ_CP081489.1	3481176	3482394	gene-K5T46_RS16670	1218	+	163	69.0992	56.7317
NZ_CP081489.1	1206896	1207322	gene-K5T46_RS05785	426	-	57	24.1635	56.7219
NZ_CP081489.1	2146513	2148364	gene-K5T46_RS10160	1851	-	247	104.709	56.5687
NZ_CP081489.1	232346	232751	gene-K5T46_RS01120	405	+	54	22.8918	56.5229
NZ_CP081489.1	1441408	1442008	gene-K5T46_RS06875	600	-	80	33.9137	56.5229
NZ_CP081489.1	2558965	2559625	gene-K5T46_RS12230	660	-	88	37.3051	56.5229
NZ_CP081489.1	4280415	4280700	gene-K5T46_RS20630	285	-	38	16.109	56.5229
NZ_CP081489.1	2324703	2325492	gene-K5T46_RS11100	789	+	105	44.5118	56.4154
NZ_CP081489.1	3420632	3421325	gene-K5T46_RS16370	693	-	92	39.0008	56.2782
NZ_CP081489.1	3690089	3690368	gene-K5T46_RS17625	279	+	37	15.6851	56.219
NZ_CP081489.1	3257672	3258095	gene-K5T46_RS15545	423	+	56	23.7396	56.122
NZ_CP081489.1	4448257	4448824	gene-K5T46_RS21530	567	+	75	31.7941	56.0743
NZ_CP081489.1	4292576	4293242	gene-K5T46_RS20700	666	-	88	37.3051	56.0137
NZ_CP081489.1	3602895	3603510	gene-K5T46_RS17250	615	+	81	34.3376	55.8336
NZ_CP081489.1	1769592	1770462	gene-K5T46_RS08410	870	-	114	48.3271	55.5483
NZ_CP081489.1	3007644	3007980	gene-K5T46_RS14350	336	+	44	18.6525	55.5135
NZ_CP081489.1	2111985	2112726	gene-K5T46_RS09995	741	+	97	41.1204	55.4931
NZ_CP081489.1	3682929	3683082	gene-K5T46_RS17600	153	+	20	8.47843	55.4146
NZ_CP081489.1	1431738	1434789	gene-K5T46_RS06830	3051	+	398	168.721	55.3002
NZ_CP081489.1	1088194	1088263	gene-K5T46_RS05210	69	-	9	3.81529	55.2941
NZ_CP081489.1	1784800	1784992	gene-K5T46_RS08490	192	-	25	10.598	55.1981
NZ_CP081489.1	3987076	3987268	gene-K5T46_RS19130	192	+	25	10.598	55.1981
NZ_CP081489.1	3825338	3826160	gene-K5T46_RS18285	822	+	107	45.3596	55.182
NZ_CP081489.1	1896080	1896449	gene-K5T46_RS09025	369	-	48	20.3482	55.1443
NZ_CP081489.1	3729221	3730544	gene-K5T46_RS17810	1323	+	172	72.9145	55.113
NZ_CP081489.1	3403908	3404139	gene-K5T46_RS16240	231	-	30	12.7176	55.0547
NZ_CP081489.1	274715	275339	gene-K5T46_RS01315	624	+	81	34.3376	55.0283
NZ_CP081489.1	3176698	3177523	gene-K5T46_RS15170	825	-	107	45.3596	54.9813
NZ_CP081489.1	3328112	3329216	gene-K5T46_RS15875	1104	-	143	60.6208	54.9101
NZ_CP081489.1	344160	344673	gene-K5T46_RS01620	513	-	66	27.9788	54.5396
NZ_CP081489.1	4033095	4034208	gene-K5T46_RS19350	1113	-	143	60.6208	54.4661
NZ_CP081489.1	1539605	1540469	gene-K5T46_RS07345	864	-	111	47.0553	54.4621
NZ_CP081489.1	515800	516781	gene-K5T46_RS02420	981	-	126	53.4141	54.4486
NZ_CP081489.1	1817365	1819051	gene-K5T46_RS08655	1686	+	216	91.5671	54.3102
NZ_CP081489.1	2795681	2796017	gene-K5T46_RS13330	336	+	43	18.2286	54.2519
NZ_CP081489.1	3636356	3636716	gene-K5T46_RS17395	360	+	46	19.5004	54.1678
NZ_CP081489.1	1808814	1810179	gene-K5T46_RS08610	1365	-	174	73.7624	54.0384
NZ_CP081489.1	1442106	1442892	gene-K5T46_RS06880	786	-	100	42.3922	53.934
NZ_CP081489.1	486562	486751	gene-K5T46_RS02285	189	-	24	10.1741	53.8313
NZ_CP081489.1	3613835	3614111	gene-K5T46_RS17285	276	+	35	14.8373	53.7582
NZ_CP081489.1	3950001	3950814	gene-K5T46_RS18985	813	+	103	43.6639	53.7072
NZ_CP081489.1	1875664	1875988	gene-K5T46_RS08925	324	+	41	17.3808	53.6444
NZ_CP081489.1	3453585	3454260	gene-K5T46_RS16540	675	+	85	36.0333	53.3827
NZ_CP081489.1	1226802	1228581	gene-K5T46_RS05885	1779	-	224	94.9584	53.3774
NZ_CP081489.1	2186851	2187505	gene-K5T46_RS10405	654	-	82	34.7616	53.1522
NZ_CP081489.1	3935800	3935968	gene-K5T46_RS18905	168	+	21	8.90235	52.9902
NZ_CP081489.1	2141381	2141830	gene-K5T46_RS10135	449	+	56	23.7396	52.8722
NZ_CP081489.1	3455847	3456248	gene-K5T46_RS16555	401	+	50	21.1961	52.858
NZ_CP081489.1	3436194	3436980	gene-K5T46_RS16450	786	+	98	41.5443	52.8554
NZ_CP081489.1	178305	178682	gene-K5T46_RS00845	377	-	47	19.9243	52.8496
NZ_CP081489.1	2868178	2868724	gene-K5T46_RS13650	546	+	68	28.8267	52.7961
NZ_CP081489.1	574210	575569	gene-K5T46_RS02710	1359	-	169	71.6427	52.7172
NZ_CP081489.1	3829818	3830124	gene-K5T46_RS18335	306	+	38	16.109	52.6439
NZ_CP081489.1	1279968	1281201	gene-K5T46_RS06120	1233	-	153	64.86	52.6034
NZ_CP081489.1	2331394	2332144	gene-K5T46_RS11135	750	+	93	39.4247	52.5663
NZ_CP081489.1	2052778	2054110	gene-K5T46_RS09695	1332	-	165	69.9471	52.5128
NZ_CP081489.1	4464294	4464843	gene-K5T46_RS21640	549	+	68	28.8267	52.5076
NZ_CP081489.1	436786	437392	gene-K5T46_RS02030	606	+	75	31.7941	52.4655
NZ_CP081489.1	3379492	3382168	gene-K5T46_RS16130	2676	+	331	140.318	52.4357
NZ_CP081489.1	4461672	4461810	gene-K5T46_RS21625	138	+	17	7.20667	52.2222
NZ_CP081489.1	3573546	3573993	gene-K5T46_RS17100	447	-	55	23.3157	52.1604
NZ_CP081489.1	1720267	1720771	gene-K5T46_RS08170	504	-	62	26.2831	52.1491
NZ_CP081489.1	2824687	2824744	gene-K5T46_RS13460	57	+	7	2.96745	52.0605
NZ_CP081489.1	3305598	3305916	gene-K5T46_RS15755	318	-	39	16.5329	51.9904
NZ_CP081489.1	2205987	2206485	gene-K5T46_RS10475	498	-	61	25.8592	51.9261
NZ_CP081489.1	1102665	1102902	gene-K5T46_RS05280	237	-	29	12.2937	51.8723
NZ_CP081489.1	3844238	3844712	gene-K5T46_RS18450	474	+	58	24.5875	51.8723
NZ_CP081489.1	4324979	4327286	gene-K5T46_RS20830	2307	-	282	119.546	51.8188
NZ_CP081489.1	880316	880652	gene-K5T46_RS04160	336	-	41	17.3808	51.7285
NZ_CP081489.1	3035133	3035781	gene-K5T46_RS14480	648	+	79	33.4898	51.6818
NZ_CP081489.1	231413	232229	gene-K5T46_RS01115	816	+	99	41.9682	51.4317
NZ_CP081489.1	2355580	2356018	gene-K5T46_RS11255	438	-	53	22.4678	51.2964
NZ_CP081489.1	2716808	2717660	gene-K5T46_RS13010	852	+	103	43.6639	51.2487
NZ_CP081489.1	4018767	4019313	gene-K5T46_RS19265	546	-	66	27.9788	51.2433
NZ_CP081489.1	3482759	3483926	gene-K5T46_RS16675	1167	+	141	59.7729	51.2193
NZ_CP081489.1	1483192	1483954	gene-K5T46_RS07075	762	+	92	39.0008	51.1821
NZ_CP081489.1	2865252	2866338	gene-K5T46_RS13635	1086	+	131	55.5337	51.136
NZ_CP081489.1	1127707	1128904	gene-K5T46_RS05395	1197	-	144	61.0447	50.9981
NZ_CP081489.1	2056498	2057662	gene-K5T46_RS09705	1164	+	140	59.349	50.9871
NZ_CP081489.1	3745439	3745913	gene-K5T46_RS17885	474	+	57	24.1635	50.9779
NZ_CP081489.1	1046167	1046917	gene-K5T46_RS05000	750	+	90	38.1529	50.8706
NZ_CP081489.1	4100342	4100642	gene-K5T46_RS19705	300	-	36	15.2612	50.8706
NZ_CP081489.1	352730	353975	gene-K5T46_RS01660	1245	-	149	63.1643	50.7344
NZ_CP081489.1	4400067	4401120	gene-K5T46_RS21290	1053	-	126	53.4141	50.7257
NZ_CP081489.1	1291737	1292598	gene-K5T46_RS06175	861	-	103	43.6639	50.713
NZ_CP081489.1	984033	984234	gene-K5T46_RS04680	201	+	24	10.1741	50.6175
NZ_CP081489.1	3713605	3715213	gene-K5T46_RS17745	1608	+	192	81.3929	50.6175
NZ_CP081489.1	1891742	1892764	gene-K5T46_RS09000	1022	-	122	51.7184	50.6051
NZ_CP081489.1	2636659	2637574	gene-K5T46_RS12650	915	-	109	46.2074	50.4999
NZ_CP081489.1	869946	870543	gene-K5T46_RS04090	597	-	71	30.0984	50.4161
NZ_CP081489.1	86290	86713	gene-K5T46_RS00405	423	-	50	21.1961	50.1089
NZ_CP081489.1	1789571	1790855	gene-K5T46_RS08510	1284	-	151	64.0122	49.8537
NZ_CP081489.1	2372397	2372865	gene-K5T46_RS11325	468	+	55	23.3157	49.8198
NZ_CP081489.1	535047	535311	gene-K5T46_RS02520	264	-	31	13.1416	49.7787
NZ_CP081489.1	4310611	4311046	gene-K5T46_RS20775	435	+	51	21.62	49.7011
NZ_CP081489.1	3576333	3576879	gene-K5T46_RS17125	546	+	64	27.131	49.6904
NZ_CP081489.1	1027724	1028381	gene-K5T46_RS04910	657	+	77	32.642	49.6833
NZ_CP081489.1	1124353	1124797	gene-K5T46_RS05385	444	+	52	22.0439	49.6485
NZ_CP081489.1	3512964	3513750	gene-K5T46_RS16820	786	-	92	39.0008	49.6193
NZ_CP081489.1	2427058	2428255	gene-K5T46_RS11575	1197	-	140	59.349	49.5815
NZ_CP081489.1	3592929	3593100	gene-K5T46_RS17200	171	+	20	8.47843	49.5815
NZ_CP081489.1	1037362	1039009	gene-K5T46_RS04965	1647	+	192	81.3929	49.4189
NZ_CP081489.1	1359841	1360846	gene-K5T46_RS06510	1005	-	117	49.5988	49.3521
NZ_CP081489.1	3301687	3302962	gene-K5T46_RS15740	1275	-	148	62.7404	49.2081
NZ_CP081489.1	853722	854688	gene-K5T46_RS04025	966	+	112	47.4792	49.1503
NZ_CP081489.1	2875688	2876456	gene-K5T46_RS13690	768	+	89	37.729	49.1263
NZ_CP081489.1	872100	872385	gene-K5T46_RS04100	285	-	33	13.9894	49.0857
NZ_CP081489.1	710720	711368	gene-K5T46_RS03365	648	-	75	31.7941	49.065
NZ_CP081489.1	3760874	3761462	gene-K5T46_RS17960	588	+	68	28.8267	49.0249
NZ_CP081489.1	1392885	1393845	gene-K5T46_RS06635	960	+	111	47.0553	49.0159
NZ_CP081489.1	3081625	3082585	gene-K5T46_RS14695	960	+	111	47.0553	49.0159
NZ_CP081489.1	1909569	1910460	gene-K5T46_RS09075	891	+	103	43.6639	49.0055
NZ_CP081489.1	1696406	1697903	gene-K5T46_RS08030	1497	-	173	73.3384	48.9903
NZ_CP081489.1	2879485	2879641	gene-K5T46_RS13725	156	-	18	7.63059	48.914
NZ_CP081489.1	531837	532428	gene-K5T46_RS02505	591	+	68	28.8267	48.7761
NZ_CP081489.1	3360397	3361591	gene-K5T46_RS16015	1194	+	137	58.0773	48.6409
NZ_CP081489.1	2278319	2279270	gene-K5T46_RS10870	951	+	109	46.2074	48.5883
NZ_CP081489.1	2183218	2183506	gene-K5T46_RS10375	288	+	33	13.9894	48.5743
NZ_CP081489.1	1438051	1438270	gene-K5T46_RS06855	219	-	25	10.598	48.3929
NZ_CP081489.1	3412142	3412475	gene-K5T46_RS16310	333	-	38	16.109	48.3754
NZ_CP081489.1	299528	300098	gene-K5T46_RS01420	570	+	65	27.5549	48.3419
NZ_CP081489.1	4420600	4421293	gene-K5T46_RS21420	693	-	79	33.4898	48.3258
NZ_CP081489.1	2873414	2874590	gene-K5T46_RS13680	1176	+	134	56.8055	48.304
NZ_CP081489.1	4385766	4386600	gene-K5T46_RS21200	834	+	95	40.2725	48.2884
NZ_CP081489.1	1980475	1981714	gene-K5T46_RS09360	1239	+	141	59.7729	48.2429
NZ_CP081489.1	2313859	2314624	gene-K5T46_RS11045	765	-	87	36.8812	48.2107
NZ_CP081489.1	1777406	1778066	gene-K5T46_RS08445	660	+	75	31.7941	48.1729
NZ_CP081489.1	1294249	1295413	gene-K5T46_RS06185	1164	-	132	55.9576	48.0736
NZ_CP081489.1	1410555	1411254	gene-K5T46_RS06735	699	+	79	33.4898	47.911
NZ_CP081489.1	2863986	2864880	gene-K5T46_RS13630	894	+	101	42.8161	47.8927
NZ_CP081489.1	2136213	2137479	gene-K5T46_RS10120	1266	+	143	60.6208	47.8837
NZ_CP081489.1	3904031	3904412	gene-K5T46_RS18770	381	+	43	18.2286	47.8442
NZ_CP081489.1	1201134	1201533	gene-K5T46_RS05755	399	-	45	19.0765	47.8107
NZ_CP081489.1	1938449	1938893	gene-K5T46_RS09185	444	+	50	21.1961	47.7389
NZ_CP081489.1	2918799	2920203	gene-K5T46_RS13965	1404	-	158	66.9796	47.7063
NZ_CP081489.1	1471781	1473212	gene-K5T46_RS06995	1431	-	161	68.2514	47.6949
NZ_CP081489.1	3860743	3861952	gene-K5T46_RS18555	1209	+	136	57.6533	47.6868
NZ_CP081489.1	3127744	3128056	gene-K5T46_RS14925	312	-	35	14.8373	47.5553
NZ_CP081489.1	2489618	2490353	gene-K5T46_RS11915	735	+	82	34.7616	47.2946
NZ_CP081489.1	2428468	2429401	gene-K5T46_RS11580	933	+	104	44.0878	47.2538
NZ_CP081489.1	30506	31271	gene-K5T46_RS00125	765	+	85	36.0333	47.1024
NZ_CP081489.1	520854	520899	gene-K5T46_RS02440	45	-	5	2.11961	47.1024
NZ_CP081489.1	1962058	1962166	gene-K5T46_RS09265	108	+	12	5.08706	47.1024
NZ_CP081489.1	2420287	2420719	gene-K5T46_RS11545	432	-	48	20.3482	47.1024
NZ_CP081489.1	2866337	2867237	gene-K5T46_RS13640	900	+	100	42.3922	47.1024
NZ_CP081489.1	2877625	2878003	gene-K5T46_RS13705	378	-	42	17.8047	47.1024
NZ_CP081489.1	3039482	3039644	gene-K5T46_RS14490	162	-	18	7.63059	47.1024
NZ_CP081489.1	3953906	3956021	gene-K5T46_RS19020	2115	+	234	99.1976	46.902
NZ_CP081489.1	1122488	1124000	gene-K5T46_RS05380	1512	+	167	70.7949	46.822
NZ_CP081489.1	2654304	2654784	gene-K5T46_RS12740	480	-	53	22.4678	46.808
NZ_CP081489.1	2804206	2804668	gene-K5T46_RS13380	462	-	51	21.62	46.7965
NZ_CP081489.1	3566157	3566958	gene-K5T46_RS17075	801	-	88	37.3051	46.5732
NZ_CP081489.1	3732778	3733042	gene-K5T46_RS17825	264	-	29	12.2937	46.5671
NZ_CP081489.1	3169183	3169657	gene-K5T46_RS15130	474	-	52	22.0439	46.5062
NZ_CP081489.1	2030516	2030744	gene-K5T46_RS09570	228	+	25	10.598	46.4826
NZ_CP081489.1	3755303	3756590	gene-K5T46_RS17935	1287	+	141	59.7729	46.4436
NZ_CP081489.1	2560231	2560633	gene-K5T46_RS12240	402	+	44	18.6525	46.3994
NZ_CP081489.1	197819	198404	gene-K5T46_RS00950	585	+	64	27.131	46.3777
NZ_CP081489.1	931202	933479	gene-K5T46_RS04450	2277	+	249	105.556	46.3577
NZ_CP081489.1	2486315	2486489	gene-K5T46_RS11895	174	+	19	8.05451	46.2903
NZ_CP081489.1	4405054	4405219	gene-K5T46_RS21320	165	-	18	7.63059	46.246
NZ_CP081489.1	210360	210663	gene-K5T46_RS01015	303	+	33	13.9894	46.1697
NZ_CP081489.1	1617244	1617805	gene-K5T46_RS07695	561	-	61	25.8592	46.0949
NZ_CP081489.1	3550576	3552454	gene-K5T46_RS16980	1878	+	204	86.48	46.049
NZ_CP081489.1	4099808	4100333	gene-K5T46_RS19700	525	-	57	24.1635	46.0258
NZ_CP081489.1	3846679	3846937	gene-K5T46_RS18470	258	+	28	11.8698	46.007
NZ_CP081489.1	1978286	1979171	gene-K5T46_RS09345	885	+	96	40.6965	45.9847
NZ_CP081489.1	1221930	1222686	gene-K5T46_RS05865	756	-	82	34.7616	45.9809
NZ_CP081489.1	1566766	1568833	gene-K5T46_RS07480	2067	+	224	94.9584	45.9402
NZ_CP081489.1	1502235	1502661	gene-K5T46_RS07175	426	-	46	19.5004	45.7756
NZ_CP081489.1	2932968	2934561	gene-K5T46_RS14015	1593	+	172	72.9145	45.7718
NZ_CP081489.1	3011275	3013147	gene-K5T46_RS14365	1872	+	202	85.6322	45.7437
NZ_CP081489.1	4060496	4061015	gene-K5T46_RS19480	519	+	56	23.7396	45.7411
NZ_CP081489.1	2720146	2720248	gene-K5T46_RS13020	102	+	11	4.66314	45.717
NZ_CP081489.1	2563796	2564140	gene-K5T46_RS12265	344	-	37	15.6851	45.5962
NZ_CP081489.1	664676	664955	gene-K5T46_RS03160	279	-	30	12.7176	45.583
NZ_CP081489.1	3161777	3162521	gene-K5T46_RS15075	744	-	80	33.9137	45.583
NZ_CP081489.1	584361	585357	gene-K5T46_RS02760	996	+	107	45.3596	45.5418
NZ_CP081489.1	4438033	4439386	gene-K5T46_RS21485	1353	+	145	61.4686	45.4314
NZ_CP081489.1	1337632	1338616	gene-K5T46_RS06420	984	+	105	44.5118	45.2355
NZ_CP081489.1	930678	930753	gene-K5T46_RS04440	75	+	8	3.39137	45.2183
NZ_CP081489.1	736276	737365	gene-K5T46_RS03465	1089	-	116	49.1749	45.156
NZ_CP081489.1	2938562	2938778	gene-K5T46_RS14040	216	+	23	9.7502	45.1398
NZ_CP081489.1	1999281	2000532	gene-K5T46_RS09435	1251	-	133	56.3816	45.0692
NZ_CP081489.1	3915735	3919248	gene-K5T46_RS18825	3513	+	373	158.123	45.0107
NZ_CP081489.1	3749508	3750225	gene-K5T46_RS17905	717	-	76	32.218	44.9345
NZ_CP081489.1	465083	465725	gene-K5T46_RS02170	642	-	68	28.8267	44.9013
NZ_CP081489.1	1195058	1195814	gene-K5T46_RS05720	756	+	80	33.9137	44.8594
NZ_CP081489.1	3478360	3481162	gene-K5T46_RS16665	2802	+	295	125.057	44.6313
NZ_CP081489.1	1719150	1719474	gene-K5T46_RS08155	324	-	34	14.4133	44.4856
NZ_CP081489.1	3177975	3178099	id-NZ_CP081489.1:3177976..3178099	124	+	13	5.51098	44.4434
NZ_CP081489.1	2384883	2385858	gene-K5T46_RS11385	975	+	102	43.24	44.3487
NZ_CP081489.1	745448	746357	gene-K5T46_RS03500	909	+	95	40.2725	44.3042
NZ_CP081489.1	4117953	4118643	gene-K5T46_RS19790	690	-	72	30.5224	44.2353
NZ_CP081489.1	350137	351613	gene-K5T46_RS01650	1476	-	154	65.2839	44.2303
NZ_CP081489.1	1627520	1628240	gene-K5T46_RS07735	720	-	75	31.7941	44.1585
NZ_CP081489.1	1637260	1637836	gene-K5T46_RS07780	576	+	60	25.4353	44.1585
NZ_CP081489.1	4056221	4056269	gene-K5T46_RS19455	48	+	5	2.11961	44.1585
NZ_CP081489.1	1745124	1746858	gene-K5T46_RS08290	1734	-	180	76.3059	44.0057
NZ_CP081489.1	2534729	2536649	gene-K5T46_RS12125	1920	-	199	84.3604	43.9377
NZ_CP081489.1	2144966	2146511	gene-K5T46_RS10155	1545	-	160	67.8274	43.9013
NZ_CP081489.1	422000	422822	gene-K5T46_RS01950	822	-	85	36.0333	43.8362
NZ_CP081489.1	644643	644856	gene-K5T46_RS03055	213	+	22	9.32627	43.7853
NZ_CP081489.1	2705210	2706683	gene-K5T46_RS12955	1473	+	152	64.4361	43.7448
NZ_CP081489.1	4293201	4293366	gene-K5T46_RS20705	165	-	17	7.20667	43.6768
NZ_CP081489.1	1404718	1405486	gene-K5T46_RS06705	768	+	79	33.4898	43.6065
NZ_CP081489.1	2142028	2142310	gene-K5T46_RS10140	282	+	29	12.2937	43.5948
NZ_CP081489.1	2582718	2584179	gene-K5T46_RS12395	1461	+	150	63.5882	43.5238
NZ_CP081489.1	367065	368010	gene-K5T46_RS01730	945	-	97	41.1204	43.5136
NZ_CP081489.1	467353	468610	gene-K5T46_RS02180	1257	-	129	54.6859	43.5051
NZ_CP081489.1	1332017	1332095	gene-K5T46_RS06375	78	-	8	3.39137	43.4791
NZ_CP081489.1	4226833	4227331	gene-K5T46_RS20350	498	+	51	21.62	43.4137
NZ_CP081489.1	393962	396317	gene-K5T46_RS01835	2355	+	241	102.165	43.3822
NZ_CP081489.1	3014224	3014920	gene-K5T46_RS14380	696	-	71	30.0984	43.2449
NZ_CP081489.1	223171	223573	gene-K5T46_RS01080	402	-	41	17.3808	43.2358
NZ_CP081489.1	161511	162408	gene-K5T46_RS00770	897	-	91	38.5769	43.0065
NZ_CP081489.1	3858647	3859241	gene-K5T46_RS18540	594	+	60	25.4353	42.8204
NZ_CP081489.1	111386	112208	gene-K5T46_RS00525	822	-	83	35.1855	42.8047
NZ_CP081489.1	303583	304435	gene-K5T46_RS01445	852	+	86	36.4573	42.7902
NZ_CP081489.1	3742731	3743058	gene-K5T46_RS17865	327	+	33	13.9894	42.7811
NZ_CP081489.1	2558427	2558874	gene-K5T46_RS12225	447	-	45	19.0765	42.6767
NZ_CP081489.1	794661	795138	gene-K5T46_RS03740	477	-	48	20.3482	42.6588
NZ_CP081489.1	4036613	4036931	gene-K5T46_RS19365	318	-	32	13.5655	42.6588
NZ_CP081489.1	1900082	1900580	gene-K5T46_RS09040	498	-	50	21.1961	42.5624
NZ_CP081489.1	1622370	1624095	gene-K5T46_RS07720	1725	-	173	73.3384	42.515
NZ_CP081489.1	2131766	2132813	gene-K5T46_RS10095	1047	-	105	44.5118	42.5136
NZ_CP081489.1	862489	863818	gene-K5T46_RS04055	1329	+	133	56.3816	42.4241
NZ_CP081489.1	2982299	2982530	gene-K5T46_RS14255	231	-	23	9.7502	42.2086
NZ_CP081489.1	4081307	4082864	gene-K5T46_RS19605	1557	+	155	65.7078	42.2016
NZ_CP081489.1	3159689	3160625	gene-K5T46_RS15065	936	-	93	39.4247	42.1204
NZ_CP081489.1	937349	938408	gene-K5T46_RS04475	1059	-	105	44.5118	42.0319
NZ_CP081489.1	2531762	2534630	gene-K5T46_RS12120	2868	+	284	120.394	41.9783
NZ_CP081489.1	3835673	3836663	gene-K5T46_RS18395	990	+	98	41.5443	41.964
NZ_CP081489.1	1606035	1606713	gene-K5T46_RS07640	678	-	67	28.4027	41.892
NZ_CP081489.1	2253694	2253988	gene-K5T46_RS10705	294	-	29	12.2937	41.8154
NZ_CP081489.1	3456581	3457718	gene-K5T46_RS16560	1137	+	112	47.4792	41.7583
NZ_CP081489.1	4219566	4220013	gene-K5T46_RS20310	447	+	44	18.6525	41.7283
NZ_CP081489.1	4131334	4132015	gene-K5T46_RS19860	681	+	67	28.4027	41.7074
NZ_CP081489.1	1694684	1695743	gene-K5T46_RS08020	1059	-	104	44.0878	41.6316
NZ_CP081489.1	4056366	4057527	gene-K5T46_RS19460	1161	+	114	48.3271	41.6254
NZ_CP081489.1	1744459	1744948	gene-K5T46_RS08280	489	-	48	20.3482	41.6119
NZ_CP081489.1	2889798	2890359	gene-K5T46_RS13815	561	+	55	23.3157	41.5609
NZ_CP081489.1	2907222	2907324	gene-K5T46_RS13910	102	-	10	4.23922	41.5609
NZ_CP081489.1	1865674	1867633	gene-K5T46_RS08890	1959	+	192	81.3929	41.5482
NZ_CP081489.1	565420	566461	gene-K5T46_RS02675	1041	-	102	43.24	41.537
NZ_CP081489.1	3781864	3783195	gene-K5T46_RS18060	1331	-	130	55.1098	41.4048
NZ_CP081489.1	3231970	3232636	gene-K5T46_RS15410	666	-	65	27.5549	41.3737
NZ_CP081489.1	3808055	3808127	gene-K5T46_RS18175	72	+	7	2.96745	41.2146
NZ_CP081489.1	3952455	3952743	gene-K5T46_RS19005	288	+	28	11.8698	41.2146
NZ_CP081489.1	2111047	2111989	gene-K5T46_RS09990	942	+	91	38.5769	40.9521
NZ_CP081489.1	293204	294602	gene-K5T46_RS01395	1398	+	135	57.2294	40.9366
NZ_CP081489.1	3318155	3319067	gene-K5T46_RS15820	912	+	88	37.3051	40.9047
NZ_CP081489.1	3365922	3366462	gene-K5T46_RS16055	540	+	52	22.0439	40.8221
NZ_CP081489.1	1652194	1653025	gene-K5T46_RS07825	831	-	80	33.9137	40.8107
NZ_CP081489.1	2049093	2049582	gene-K5T46_RS09675	489	+	47	19.9243	40.745
NZ_CP081489.1	109985	111224	gene-K5T46_RS00520	1239	+	119	50.4467	40.7156
NZ_CP081489.1	1543637	1544210	gene-K5T46_RS07365	573	+	55	23.3157	40.6906
NZ_CP081489.1	1781017	1781674	gene-K5T46_RS08460	657	-	63	26.7071	40.65
NZ_CP081489.1	3288447	3289137	gene-K5T46_RS15680	690	+	66	27.9788	40.549
NZ_CP081489.1	2379467	2380283	gene-K5T46_RS11365	816	-	78	33.0659	40.5219
NZ_CP081489.1	3730595	3731819	gene-K5T46_RS17815	1224	+	117	49.5988	40.5219
NZ_CP081489.1	1058023	1058860	gene-K5T46_RS05055	837	-	80	33.9137	40.5182
NZ_CP081489.1	380262	381027	gene-K5T46_RS01790	765	-	73	30.9463	40.4526
NZ_CP081489.1	2354543	2355539	gene-K5T46_RS11250	996	+	95	40.2725	40.4343
NZ_CP081489.1	3016784	3017603	gene-K5T46_RS14390	819	+	78	33.0659	40.3735
NZ_CP081489.1	2519585	2520395	gene-K5T46_RS12060	810	-	77	32.642	40.2987
NZ_CP081489.1	285075	287601	gene-K5T46_RS01365	2526	-	240	101.741	40.2776
NZ_CP081489.1	1168630	1169188	gene-K5T46_RS05575	558	+	53	22.4678	40.265
NZ_CP081489.1	1603092	1603998	gene-K5T46_RS07625	906	-	86	36.4573	40.2398
NZ_CP081489.1	2336579	2337170	gene-K5T46_RS11170	591	+	56	23.7396	40.1685
NZ_CP081489.1	3204842	3207122	gene-K5T46_RS15290	2280	-	216	91.5671	40.161
NZ_CP081489.1	3321327	3321570	gene-K5T46_RS15835	243	+	23	9.7502	40.1243
NZ_CP081489.1	2502208	2503033	gene-K5T46_RS11980	825	+	78	33.0659	40.0799
NZ_CP081489.1	2503043	2504069	gene-K5T46_RS11985	1026	+	97	41.1204	40.0784
NZ_CP081489.1	3374993	3375914	gene-K5T46_RS16110	921	-	87	36.8812	40.0447
NZ_CP081489.1	4377075	4377615	gene-K5T46_RS21160	540	-	51	21.62	40.037
NZ_CP081489.1	2529902	2530994	gene-K5T46_RS12115	1092	+	103	43.6639	39.9853
NZ_CP081489.1	695827	696529	gene-K5T46_RS03305	702	-	66	27.9788	39.8559
NZ_CP081489.1	3844740	3845283	gene-K5T46_RS18455	543	+	51	21.62	39.8158
NZ_CP081489.1	644145	644358	gene-K5T46_RS03050	213	-	20	8.47843	39.8048
NZ_CP081489.1	4195755	4195947	gene-K5T46_RS20185	192	-	18	7.63059	39.7426
NZ_CP081489.1	1104499	1105717	gene-K5T46_RS05300	1218	-	114	48.3271	39.6774
NZ_CP081489.1	4444438	4445668	gene-K5T46_RS21515	1230	-	115	48.751	39.6349
NZ_CP081489.1	2487707	2488661	gene-K5T46_RS11905	954	+	89	37.729	39.5482
NZ_CP081489.1	2507173	2507806	gene-K5T46_RS12005	633	-	59	25.0114	39.5124
NZ_CP081489.1	258910	259468	gene-K5T46_RS01245	558	-	52	22.0439	39.5052
NZ_CP081489.1	1202260	1202959	gene-K5T46_RS05765	699	-	65	27.5549	39.4205
NZ_CP081489.1	4279056	4280412	gene-K5T46_RS20625	1356	-	126	53.4141	39.3909
NZ_CP081489.1	4333934	4334117	gene-K5T46_RS20885	183	-	17	7.20667	39.3807
NZ_CP081489.1	720695	721481	gene-K5T46_RS03395	786	-	73	30.9463	39.3718
NZ_CP081489.1	3027	3804	gene-K5T46_RS00020	777	-	72	30.5224	39.2823
NZ_CP081489.1	4078582	4079479	gene-K5T46_RS19585	897	+	83	35.1855	39.2257
NZ_CP081489.1	4393197	4393998	gene-K5T46_RS21245	801	-	74	31.3702	39.1638
NZ_CP081489.1	1312545	1313043	gene-K5T46_RS06265	498	+	46	19.5004	39.1574
NZ_CP081489.1	545141	546029	gene-K5T46_RS02570	888	+	82	34.7616	39.1459
NZ_CP081489.1	1792296	1794345	gene-K5T46_RS08525	2049	+	189	80.1212	39.1026
NZ_CP081489.1	1187445	1187673	gene-K5T46_RS05665	228	-	21	8.90235	39.0454
NZ_CP081489.1	3630606	3631845	gene-K5T46_RS17365	1239	-	114	48.3271	39.0049
NZ_CP081489.1	2480130	2483316	gene-K5T46_RS11875	3186	-	293	124.209	38.9859
NZ_CP081489.1	456844	457660	gene-K5T46_RS02130	816	+	75	31.7941	38.9634
NZ_CP081489.1	3820309	3821125	gene-K5T46_RS18250	816	-	75	31.7941	38.9634
NZ_CP081489.1	3203561	3204323	gene-K5T46_RS15280	762	-	70	29.6745	38.9429
NZ_CP081489.1	743936	744677	gene-K5T46_RS03490	741	+	68	28.8267	38.9024
NZ_CP081489.1	2280902	2282516	gene-K5T46_RS10885	1614	-	148	62.7404	38.8726
NZ_CP081489.1	1782522	1783395	gene-K5T46_RS08475	873	+	80	33.9137	38.8473
NZ_CP081489.1	1581196	1582375	gene-K5T46_RS07540	1179	-	108	45.7835	38.8325
NZ_CP081489.1	744758	745349	gene-K5T46_RS03495	591	-	54	22.8918	38.7339
NZ_CP081489.1	2524214	2524838	gene-K5T46_RS12085	624	+	57	24.1635	38.7236
NZ_CP081489.1	874577	875114	gene-K5T46_RS04115	537	+	49	20.7722	38.6819
NZ_CP081489.1	4136847	4137483	gene-K5T46_RS19900	636	+	58	24.5875	38.6595
NZ_CP081489.1	119184	120930	gene-K5T46_RS00570	1746	+	159	67.4035	38.6045
NZ_CP081489.1	2871850	2872597	gene-K5T46_RS13670	747	+	68	28.8267	38.5899
NZ_CP081489.1	255805	256663	gene-K5T46_RS01230	858	-	78	33.0659	38.5383
NZ_CP081489.1	740550	741408	gene-K5T46_RS03480	858	+	78	33.0659	38.5383
NZ_CP081489.1	2461664	2462225	gene-K5T46_RS11770	561	-	51	21.62	38.5383
NZ_CP081489.1	3333175	3335023	gene-K5T46_RS15905	1848	-	168	71.2188	38.5383
NZ_CP081489.1	3303956	3305255	gene-K5T46_RS15750	1299	-	118	50.0227	38.5087
NZ_CP081489.1	2372982	2373456	gene-K5T46_RS11330	474	+	43	18.2286	38.457
NZ_CP081489.1	3841541	3842489	gene-K5T46_RS18435	948	-	86	36.4573	38.457
NZ_CP081489.1	936228	937353	gene-K5T46_RS04470	1125	-	102	43.24	38.4356
NZ_CP081489.1	1484138	1485110	gene-K5T46_RS07080	972	+	88	37.3051	38.3797
NZ_CP081489.1	2170754	2171726	gene-K5T46_RS10295	972	+	88	37.3051	38.3797
NZ_CP081489.1	2936881	2937922	gene-K5T46_RS14030	1041	-	94	39.8486	38.2792
NZ_CP081489.1	823578	824664	gene-K5T46_RS03880	1086	+	98	41.5443	38.2544
NZ_CP081489.1	598868	599123	gene-K5T46_RS02830	255	-	23	9.7502	38.2361
NZ_CP081489.1	3264865	3265963	gene-K5T46_RS15590	1098	-	99	41.9682	38.2224
NZ_CP081489.1	3722550	3723687	gene-K5T46_RS17775	1137	-	102	43.24	38.0299
NZ_CP081489.1	42673	43387	gene-K5T46_RS00185	714	-	64	27.131	37.9986
NZ_CP081489.1	2015241	2015955	gene-K5T46_RS09505	714	+	64	27.131	37.9986
NZ_CP081489.1	2254275	2254989	gene-K5T46_RS10715	714	-	64	27.131	37.9986
NZ_CP081489.1	4493816	4494095	gene-K5T46_RS21840	279	-	25	10.598	37.9858
NZ_CP081489.1	4195996	4196521	gene-K5T46_RS20190	525	-	47	19.9243	37.9511
NZ_CP081489.1	3378368	3379016	gene-K5T46_RS16120	648	-	58	24.5875	37.9436
NZ_CP081489.1	2688386	2688632	gene-K5T46_RS12875	246	-	22	9.32627	37.9117
NZ_CP081489.1	3386462	3387368	gene-K5T46_RS16155	906	-	81	34.3376	37.9003
NZ_CP081489.1	4017472	4018177	gene-K5T46_RS19255	705	-	63	26.7071	37.8824
NZ_CP081489.1	1172173	1172554	gene-K5T46_RS05590	381	-	34	14.4133	37.8303
NZ_CP081489.1	3086009	3087524	gene-K5T46_RS14725	1515	-	135	57.2294	37.7752
NZ_CP081489.1	3691694	3692267	gene-K5T46_RS17635	573	-	51	21.62	37.7312
NZ_CP081489.1	4029530	4030172	gene-K5T46_RS19330	642	-	57	24.1635	37.6379
NZ_CP081489.1	4392570	4393167	gene-K5T46_RS21240	597	-	53	22.4678	37.6346
NZ_CP081489.1	250343	251369	gene-K5T46_RS01210	1026	-	91	38.5769	37.5993
NZ_CP081489.1	2433877	2434903	gene-K5T46_RS11605	1026	-	91	38.5769	37.5993
NZ_CP081489.1	1079446	1080439	gene-K5T46_RS05160	993	+	88	37.3051	37.5681
NZ_CP081489.1	236360	237071	gene-K5T46_RS01140	711	-	63	26.7071	37.5627
NZ_CP081489.1	4118947	4119331	gene-K5T46_RS19795	384	+	34	14.4133	37.5347
NZ_CP081489.1	1158764	1159295	gene-K5T46_RS05540	531	+	47	19.9243	37.5222
NZ_CP081489.1	3065493	3066171	gene-K5T46_RS14610	678	+	60	25.4353	37.5152
NZ_CP081489.1	3082970	3083750	gene-K5T46_RS14705	780	+	69	29.2506	37.5008
NZ_CP081489.1	1263208	1263616	gene-K5T46_RS06025	408	-	36	15.2612	37.4048
NZ_CP081489.1	3063567	3063975	gene-K5T46_RS14595	408	+	36	15.2612	37.4048
NZ_CP081489.1	1318610	1319177	gene-K5T46_RS06305	567	+	50	21.1961	37.3829
NZ_CP081489.1	3187814	3189221	gene-K5T46_RS15230	1407	-	124	52.5663	37.3605
NZ_CP081489.1	440475	440805	gene-K5T46_RS02050	330	-	29	12.2937	37.2537
NZ_CP081489.1	1207526	1208825	gene-K5T46_RS05790	1299	-	114	48.3271	37.2033
NZ_CP081489.1	2452527	2452755	gene-K5T46_RS11710	228	+	20	8.47843	37.1861
NZ_CP081489.1	2176301	2177111	gene-K5T46_RS10335	810	-	71	30.0984	37.1586
NZ_CP081489.1	2227577	2228171	gene-K5T46_RS10570	594	-	52	22.0439	37.111
NZ_CP081489.1	1770799	1772275	gene-K5T46_RS08415	1476	+	129	54.6859	37.0501
NZ_CP081489.1	1087410	1088108	gene-K5T46_RS05205	698	-	61	25.8592	37.0476
NZ_CP081489.1	1803228	1804029	gene-K5T46_RS08590	801	-	70	29.6745	37.0468
NZ_CP081489.1	609305	609719	gene-K5T46_RS02885	414	+	36	15.2612	36.8627
NZ_CP081489.1	666659	667073	gene-K5T46_RS03175	414	-	36	15.2612	36.8627
NZ_CP081489.1	2652253	2652805	gene-K5T46_RS12725	552	+	48	20.3482	36.8627
NZ_CP081489.1	1620324	1620993	gene-K5T46_RS07705	669	+	58	24.5875	36.7525
NZ_CP081489.1	290844	291549	gene-K5T46_RS01380	705	+	61	25.8592	36.6797
NZ_CP081489.1	2100704	2101607	gene-K5T46_RS09940	903	+	78	33.0659	36.6178
NZ_CP081489.1	1316290	1316707	gene-K5T46_RS06290	417	+	36	15.2612	36.5975
NZ_CP081489.1	1072161	1072695	gene-K5T46_RS05115	534	-	46	19.5004	36.5176
NZ_CP081489.1	1263596	1263863	gene-K5T46_RS06030	267	-	23	9.7502	36.5176
NZ_CP081489.1	1124796	1127652	gene-K5T46_RS05390	2856	+	246	104.285	36.5143
NZ_CP081489.1	2552057	2552777	gene-K5T46_RS12195	720	-	62	26.2831	36.5044
NZ_CP081489.1	3066157	3066937	gene-K5T46_RS14615	780	+	67	28.4027	36.4138
NZ_CP081489.1	1272364	1273459	gene-K5T46_RS06070	1095	-	94	39.8486	36.3914
NZ_CP081489.1	3363042	3363543	gene-K5T46_RS16030	501	+	43	18.2286	36.3845
NZ_CP081489.1	2253570	2253675	gene-K5T46_RS10700	105	-	9	3.81529	36.3361
NZ_CP081489.1	2287481	2289023	gene-K5T46_RS10920	1542	-	132	55.9576	36.289
NZ_CP081489.1	1749912	1752342	gene-K5T46_RS08310	2430	+	208	88.1757	36.2863
NZ_CP081489.1	3263326	3263770	gene-K5T46_RS15580	444	+	38	16.109	36.2816
NZ_CP081489.1	512936	513649	gene-K5T46_RS02400	713	-	61	25.8592	36.2682
NZ_CP081489.1	3607163	3608309	gene-K5T46_RS17260	1146	-	98	41.5443	36.2516
NZ_CP081489.1	2057944	2058646	gene-K5T46_RS09710	702	-	60	25.4353	36.2326
NZ_CP081489.1	3668432	3669626	gene-K5T46_RS17555	1194	+	102	43.24	36.2144
NZ_CP081489.1	1693585	1694440	gene-K5T46_RS08015	855	-	73	30.9463	36.1945
NZ_CP081489.1	1702410	1702656	gene-K5T46_RS08060	246	-	21	8.90235	36.1884
NZ_CP081489.1	835635	836139	gene-K5T46_RS03940	504	-	43	18.2286	36.1679
NZ_CP081489.1	1475072	1475342	gene-K5T46_RS07010	270	-	23	9.7502	36.1118
NZ_CP081489.1	552388	553609	gene-K5T46_RS02605	1221	-	104	44.0878	36.108
NZ_CP081489.1	2905574	2906396	gene-K5T46_RS13895	822	+	70	29.6745	36.1004
NZ_CP081489.1	3068713	3069337	gene-K5T46_RS14630	624	-	53	22.4678	36.0062
NZ_CP081489.1	425988	428805	gene-K5T46_RS01975	2817	-	239	101.317	35.9664
NZ_CP081489.1	1606730	1607567	gene-K5T46_RS07645	837	-	71	30.0984	35.9599
NZ_CP081489.1	1783407	1783749	gene-K5T46_RS08480	342	+	29	12.2937	35.9466
NZ_CP081489.1	3632180	3633383	gene-K5T46_RS17370	1203	+	102	43.24	35.9435
NZ_CP081489.1	1131300	1132953	gene-K5T46_RS05415	1653	-	140	59.349	35.9038
NZ_CP081489.1	1764530	1765463	gene-K5T46_RS08390	933	+	79	33.4898	35.8948
NZ_CP081489.1	1988247	1989405	gene-K5T46_RS09390	1158	-	98	41.5443	35.8759
NZ_CP081489.1	3985508	3987080	gene-K5T46_RS19125	1572	+	133	56.3816	35.8661
NZ_CP081489.1	1760066	1760669	gene-K5T46_RS08360	603	-	51	21.62	35.8541
NZ_CP081489.1	2809444	2810344	gene-K5T46_RS13410	900	-	76	32.218	35.7978
NZ_CP081489.1	2404054	2405203	gene-K5T46_RS11475	1149	+	97	41.1204	35.788
NZ_CP081489.1	3314652	3315588	gene-K5T46_RS15805	936	-	79	33.4898	35.7797
NZ_CP081489.1	4277626	4277863	gene-K5T46_RS20615	237	-	20	8.47843	35.774
NZ_CP081489.1	2313275	2313833	gene-K5T46_RS11040	558	-	47	19.9243	35.7067
NZ_CP081489.1	2353	3031	gene-K5T46_RS00015	678	-	57	24.1635	35.6394
NZ_CP081489.1	112298	112667	gene-K5T46_RS00530	369	-	31	13.1416	35.614
NZ_CP081489.1	3441153	3442608	gene-K5T46_RS16470	1455	-	122	51.7184	35.5453
NZ_CP081489.1	3880393	3881455	gene-K5T46_RS18660	1062	+	89	37.729	35.5264
NZ_CP081489.1	1582385	1583006	gene-K5T46_RS07545	621	-	52	22.0439	35.4975
NZ_CP081489.1	218434	219319	gene-K5T46_RS01060	885	-	74	31.3702	35.4465
NZ_CP081489.1	4277968	4279009	gene-K5T46_RS20620	1041	-	87	36.8812	35.4286
NZ_CP081489.1	77283	77679	gene-K5T46_RS00345	396	-	33	13.9894	35.3268
NZ_CP081489.1	155862	155946	gene-K5T46_RS00715	84	+	7	2.96745	35.3268
NZ_CP081489.1	206803	207379	gene-K5T46_RS00990	576	+	48	20.3482	35.3268
NZ_CP081489.1	392892	393708	gene-K5T46_RS01830	816	-	68	28.8267	35.3268
NZ_CP081489.1	1255732	1255804	gene-K5T46_RS05985	72	-	6	2.54353	35.3268
NZ_CP081489.1	2107081	2107285	gene-K5T46_RS09970	204	-	17	7.20667	35.3268
NZ_CP081489.1	4193895	4193979	gene-K5T46_RS20165	84	-	7	2.96745	35.3268
NZ_CP081489.1	4488099	4488207	gene-K5T46_RS21760	108	-	9	3.81529	35.3268
NZ_CP081489.1	928285	930232	gene-K5T46_RS04430	1947	+	162	68.6753	35.2724
NZ_CP081489.1	3542134	3543424	gene-K5T46_RS16935	1290	+	107	45.3596	35.1625
NZ_CP081489.1	2206490	2207129	gene-K5T46_RS10480	639	-	53	22.4678	35.1609
NZ_CP081489.1	1110498	1111764	gene-K5T46_RS05320	1266	-	105	44.5118	35.1594
NZ_CP081489.1	3483925	3484795	gene-K5T46_RS16680	870	+	72	30.5224	35.0832
NZ_CP081489.1	4087392	4088130	gene-K5T46_RS19635	738	-	61	25.8592	35.0396
NZ_CP081489.1	2406295	2406658	gene-K5T46_RS11490	363	+	30	12.7176	35.0348
NZ_CP081489.1	3525321	3527556	gene-K5T46_RS16875	2235	-	184	78.0016	34.9
NZ_CP081489.1	2291781	2292780	gene-K5T46_RS10935	999	+	82	34.7616	34.7964
NZ_CP081489.1	3043448	3043778	gene-K5T46_RS14515	330	+	27	11.4459	34.6845
NZ_CP081489.1	632964	633270	gene-K5T46_RS02995	306	+	25	10.598	34.6341
NZ_CP081489.1	992072	992366	gene-K5T46_RS04730	294	+	24	10.1741	34.6058
NZ_CP081489.1	2405202	2405790	gene-K5T46_RS11480	588	+	48	20.3482	34.6058
NZ_CP081489.1	1150551	1151103	gene-K5T46_RS05505	552	+	45	19.0765	34.5588
NZ_CP081489.1	867008	867635	gene-K5T46_RS04075	627	-	51	21.62	34.4817
NZ_CP081489.1	161104	161461	gene-K5T46_RS00765	357	+	29	12.2937	34.4362
NZ_CP081489.1	3651004	3652285	gene-K5T46_RS17480	1281	+	104	44.0878	34.4167
NZ_CP081489.1	3247692	3248691	gene-K5T46_RS15510	999	-	81	34.3376	34.372
NZ_CP081489.1	3044492	3046367	gene-K5T46_RS14525	1875	+	152	64.4361	34.3659
NZ_CP081489.1	3077941	3079003	gene-K5T46_RS14675	1062	-	86	36.4573	34.3289
NZ_CP081489.1	1573514	1574033	gene-K5T46_RS07505	519	+	42	17.8047	34.3058
NZ_CP081489.1	2870161	2871274	gene-K5T46_RS13660	1113	+	90	38.1529	34.2794
NZ_CP081489.1	2923466	2924975	gene-K5T46_RS13980	1509	+	122	51.7184	34.2733
NZ_CP081489.1	2715624	2716218	gene-K5T46_RS13000	594	+	48	20.3482	34.2563
NZ_CP081489.1	3298729	3299422	gene-K5T46_RS15725	693	-	56	23.7396	34.2563
NZ_CP081489.1	4189475	4189673	gene-K5T46_RS20140	198	+	16	6.78274	34.2563
NZ_CP081489.1	3361590	3362397	gene-K5T46_RS16020	807	+	65	27.5549	34.1449
NZ_CP081489.1	2522744	2524001	gene-K5T46_RS12080	1257	-	101	42.8161	34.0621
NZ_CP081489.1	35460	35709	gene-K5T46_RS00145	249	+	20	8.47843	34.0499
NZ_CP081489.1	935438	936236	gene-K5T46_RS04465	798	-	64	27.131	33.9987
NZ_CP081489.1	396369	397656	gene-K5T46_RS01840	1287	+	103	43.6639	33.9269
NZ_CP081489.1	3329219	3329669	gene-K5T46_RS15880	450	-	36	15.2612	33.9137
NZ_CP081489.1	4019927	4020002	gene-K5T46_RS19275	75	-	6	2.54353	33.9137
NZ_CP081489.1	808020	808734	gene-K5T46_RS03810	714	+	57	24.1635	33.8425
NZ_CP081489.1	1887319	1888735	gene-K5T46_RS08980	1416	-	113	47.9031	33.8299
NZ_CP081489.1	3081065	3081629	gene-K5T46_RS14690	564	+	45	19.0765	33.8235
NZ_CP081489.1	3181421	3182489	gene-K5T46_RS15195	1068	+	85	36.0333	33.7391
NZ_CP081489.1	2518695	2519550	gene-K5T46_RS12055	855	-	68	28.8267	33.7154
NZ_CP081489.1	912852	913683	gene-K5T46_RS04370	831	+	66	27.9788	33.6689
NZ_CP081489.1	3956840	3958238	gene-K5T46_RS19035	1398	-	111	47.0553	33.659
NZ_CP081489.1	2271292	2272201	gene-K5T46_RS10840	909	-	72	30.5224	33.5779
NZ_CP081489.1	3316004	3317369	gene-K5T46_RS15810	1365	+	108	45.7835	33.541
NZ_CP081489.1	3821304	3822774	gene-K5T46_RS18255	1470	+	116	49.1749	33.4523
NZ_CP081489.1	2254000	2254279	gene-K5T46_RS10710	279	-	22	9.32627	33.4275
NZ_CP081489.1	3127015	3127726	gene-K5T46_RS14920	711	-	56	23.7396	33.389
NZ_CP081489.1	324790	326683	gene-K5T46_RS01535	1893	-	149	63.1643	33.3673
NZ_CP081489.1	2697155	2698019	gene-K5T46_RS12915	864	-	68	28.8267	33.3642
NZ_CP081489.1	2563158	2563425	gene-K5T46_RS12260	267	+	21	8.90235	33.3421
NZ_CP081489.1	3215427	3215694	gene-K5T46_RS15330	267	-	21	8.90235	33.3421
NZ_CP081489.1	4401929	4402871	gene-K5T46_RS21300	942	+	74	31.3702	33.3017
NZ_CP081489.1	344903	345821	gene-K5T46_RS01625	918	-	72	30.5224	33.2487
NZ_CP081489.1	1561798	1562500	gene-K5T46_RS07455	702	-	55	23.3157	33.2132
NZ_CP081489.1	333732	334626	gene-K5T46_RS01565	894	+	70	29.6745	33.193
NZ_CP081489.1	4231193	4231487	gene-K5T46_RS20370	294	+	23	9.7502	33.1639
NZ_CP081489.1	203794	205831	gene-K5T46_RS00975	2037	+	159	67.4035	33.0896
NZ_CP081489.1	1704175	1705393	gene-K5T46_RS08075	1218	-	95	40.2725	33.0645
NZ_CP081489.1	94846	95398	gene-K5T46_RS00455	552	+	43	18.2286	33.0229
NZ_CP081489.1	3827533	3827944	gene-K5T46_RS18305	411	+	32	13.5655	33.0061
NZ_CP081489.1	1005409	1005499	gene-K5T46_RS04790	90	+	7	2.96745	32.9717
NZ_CP081489.1	1812379	1812559	gene-K5T46_RS08625	180	+	14	5.9349	32.9717
NZ_CP081489.1	256675	257434	gene-K5T46_RS01235	759	-	59	25.0114	32.9531
NZ_CP081489.1	2177320	2178298	gene-K5T46_RS10340	978	+	76	32.218	32.9428
NZ_CP081489.1	4027144	4028110	gene-K5T46_RS19320	966	-	75	31.7941	32.9132
NZ_CP081489.1	895619	895838	gene-K5T46_RS04265	219	+	17	7.20667	32.9072
NZ_CP081489.1	87547	89029	gene-K5T46_RS00415	1482	+	115	48.751	32.8954
NZ_CP081489.1	971951	973253	gene-K5T46_RS04630	1302	+	101	42.8161	32.8849
NZ_CP081489.1	2916496	2917798	gene-K5T46_RS13955	1302	+	101	42.8161	32.8849
NZ_CP081489.1	4040095	4042678	gene-K5T46_RS19390	2583	-	200	84.7843	32.824
NZ_CP081489.1	4217438	4218575	gene-K5T46_RS20300	1137	+	88	37.3051	32.8101
NZ_CP081489.1	1032434	1033508	gene-K5T46_RS04930	1074	-	83	35.1855	32.7612
NZ_CP081489.1	4244067	4244508	gene-K5T46_RS20455	441	-	34	14.4133	32.6833
NZ_CP081489.1	4353125	4353242	gene-K5T46_RS21030	117	+	9	3.81529	32.6094
NZ_CP081489.1	4389117	4389585	gene-K5T46_RS21220	468	+	36	15.2612	32.6094
NZ_CP081489.1	967583	968768	gene-K5T46_RS04615	1185	+	91	38.5769	32.5543
NZ_CP081489.1	2615746	2616241	gene-K5T46_RS12540	495	-	38	16.109	32.5435
NZ_CP081489.1	1519829	1522109	gene-K5T46_RS07275	2280	-	175	74.1863	32.5378
NZ_CP081489.1	2307831	2308809	gene-K5T46_RS11020	978	+	75	31.7941	32.5093
NZ_CP081489.1	2449811	2452355	gene-K5T46_RS11705	2544	+	195	82.6647	32.494
NZ_CP081489.1	2485742	2486264	gene-K5T46_RS11890	522	+	40	16.9569	32.4844
NZ_CP081489.1	2608275	2608719	gene-K5T46_RS12510	444	-	34	14.4133	32.4625
NZ_CP081489.1	3327553	3328024	gene-K5T46_RS15870	471	-	36	15.2612	32.4016
NZ_CP081489.1	1408854	1409757	gene-K5T46_RS06725	903	-	69	29.2506	32.3927
NZ_CP081489.1	78716	79109	gene-K5T46_RS00360	393	-	30	12.7176	32.3604
NZ_CP081489.1	2095030	2095921	gene-K5T46_RS09895	891	+	68	28.8267	32.3532
NZ_CP081489.1	461348	462281	gene-K5T46_RS02155	933	-	71	30.0984	32.2598
NZ_CP081489.1	949156	949774	gene-K5T46_RS04545	618	+	47	19.9243	32.24
NZ_CP081489.1	3856023	3856563	gene-K5T46_RS18525	540	+	41	17.3808	32.1866
NZ_CP081489.1	3233570	3234005	gene-K5T46_RS15425	435	+	33	13.9894	32.1596
NZ_CP081489.1	1261639	1262536	gene-K5T46_RS06015	897	-	68	28.8267	32.1368
NZ_CP081489.1	3389415	3389547	gene-K5T46_RS16185	132	+	10	4.23922	32.1153
NZ_CP081489.1	3521933	3523571	gene-K5T46_RS16855	1638	-	124	52.5663	32.0917
NZ_CP081489.1	339158	339779	gene-K5T46_RS01595	621	+	47	19.9243	32.0842
NZ_CP081489.1	3560859	3562524	gene-K5T46_RS17055	1665	-	126	53.4141	32.0806
NZ_CP081489.1	4074631	4075861	gene-K5T46_RS19570	1230	+	93	39.4247	32.0526
NZ_CP081489.1	529026	529317	gene-K5T46_RS02485	291	+	22	9.32627	32.0491
NZ_CP081489.1	3783218	3783509	gene-K5T46_RS18065	291	-	22	9.32627	32.0491
NZ_CP081489.1	668493	670548	gene-K5T46_RS03190	2055	-	155	65.7078	31.9746
NZ_CP081489.1	2706696	2708367	gene-K5T46_RS12960	1671	+	126	53.4141	31.9654
NZ_CP081489.1	2879017	2879269	gene-K5T46_RS13720	252	-	19	8.05451	31.9623
NZ_CP081489.1	3745925	3746615	gene-K5T46_RS17890	690	+	52	22.0439	31.9477
NZ_CP081489.1	2760104	2762732	gene-K5T46_RS13190	2628	-	198	83.9365	31.9393
NZ_CP081489.1	4072797	4073235	gene-K5T46_RS19555	438	-	33	13.9894	31.9393
NZ_CP081489.1	2171954	2172233	gene-K5T46_RS10300	279	+	21	8.90235	31.9081
NZ_CP081489.1	3584402	3585080	gene-K5T46_RS17165	678	-	51	21.62	31.8879
NZ_CP081489.1	3803025	3804408	gene-K5T46_RS18155	1383	-	104	44.0878	31.8784
NZ_CP081489.1	353974	355291	gene-K5T46_RS01665	1317	-	99	41.9682	31.8665
NZ_CP081489.1	1304703	1305462	gene-K5T46_RS06230	759	+	57	24.1635	31.836
NZ_CP081489.1	1605284	1606043	gene-K5T46_RS07635	759	-	57	24.1635	31.836
NZ_CP081489.1	448432	449032	gene-K5T46_RS02100	600	+	45	19.0765	31.7941
NZ_CP081489.1	4127595	4128075	gene-K5T46_RS19845	480	+	36	15.2612	31.7941
NZ_CP081489.1	2454610	2455531	gene-K5T46_RS11725	921	-	69	29.2506	31.7596
NZ_CP081489.1	4481717	4482398	gene-K5T46_RS21720	681	+	51	21.62	31.7474
NZ_CP081489.1	4044605	4045313	gene-K5T46_RS19405	708	+	53	22.4678	31.7342
NZ_CP081489.1	2963959	2965216	gene-K5T46_RS14175	1257	+	94	39.8486	31.7014
NZ_CP081489.1	1985792	1986786	gene-K5T46_RS09380	994	-	74	31.3702	31.5596
NZ_CP081489.1	714231	718692	gene-K5T46_RS03380	4461	-	332	140.742	31.5494
NZ_CP081489.1	2290228	2291626	gene-K5T46_RS10930	1398	-	104	44.0878	31.5364
NZ_CP081489.1	4366199	4367006	gene-K5T46_RS21105	807	+	60	25.4353	31.5183
NZ_CP081489.1	1301704	1302121	gene-K5T46_RS06220	417	-	31	13.1416	31.5146
NZ_CP081489.1	2214410	2214881	gene-K5T46_RS10520	471	+	35	14.8373	31.5016
NZ_CP081489.1	4224261	4225002	gene-K5T46_RS20330	741	-	55	23.3157	31.4652
NZ_CP081489.1	1761563	1762574	gene-K5T46_RS08375	1011	+	75	31.7941	31.4482
NZ_CP081489.1	1747073	1747640	gene-K5T46_RS08295	567	+	42	17.8047	31.4016
NZ_CP081489.1	3063975	3064434	gene-K5T46_RS14600	459	-	34	14.4133	31.4016
NZ_CP081489.1	3694734	3695301	gene-K5T46_RS17660	567	-	42	17.8047	31.4016
NZ_CP081489.1	4488582	4488690	gene-K5T46_RS21765	108	-	8	3.39137	31.4016
NZ_CP081489.1	3238555	3238948	gene-K5T46_RS15465	393	-	29	12.2937	31.2817
NZ_CP081489.1	1559817	1561281	gene-K5T46_RS07445	1464	+	108	45.7835	31.2729
NZ_CP081489.1	3922637	3923369	gene-K5T46_RS18845	732	-	54	22.8918	31.2729
NZ_CP081489.1	4059981	4060347	gene-K5T46_RS19475	366	+	27	11.4459	31.2729
NZ_CP081489.1	586372	587227	gene-K5T46_RS02770	855	-	63	26.7071	31.2363
NZ_CP081489.1	1102891	1103149	gene-K5T46_RS05285	258	+	19	8.05451	31.219
NZ_CP081489.1	2259283	2259772	gene-K5T46_RS10760	489	-	36	15.2612	31.2089
NZ_CP081489.1	3724637	3725357	gene-K5T46_RS17790	720	-	53	22.4678	31.2053
NZ_CP081489.1	1497518	1498415	gene-K5T46_RS07150	897	+	66	27.9788	31.1916
NZ_CP081489.1	3913417	3913621	gene-K5T46_RS18810	204	+	15	6.35882	31.1707
NZ_CP081489.1	3340310	3341684	gene-K5T46_RS15935	1374	-	101	42.8161	31.1616
NZ_CP081489.1	2464513	2465098	gene-K5T46_RS11785	585	+	43	18.2286	31.16
NZ_CP081489.1	3464813	3465548	gene-K5T46_RS16600	735	+	54	22.8918	31.1453
NZ_CP081489.1	2700484	2701573	gene-K5T46_RS12935	1089	-	80	33.9137	31.1421
NZ_CP081489.1	1501799	1502249	gene-K5T46_RS07170	450	-	33	13.9894	31.0876
NZ_CP081489.1	1440542	1441415	gene-K5T46_RS06870	873	-	64	27.131	31.0779
NZ_CP081489.1	1568837	1570379	gene-K5T46_RS07485	1542	+	113	47.9031	31.0656
NZ_CP081489.1	583292	583565	gene-K5T46_RS02750	273	-	20	8.47843	31.0565
NZ_CP081489.1	3540213	3541578	gene-K5T46_RS16930	1365	+	100	42.3922	31.0565
NZ_CP081489.1	3712170	3713223	gene-K5T46_RS17740	1053	-	77	32.642	30.999
NZ_CP081489.1	1436332	1437262	gene-K5T46_RS06845	930	+	68	28.8267	30.9964
NZ_CP081489.1	3463241	3463898	gene-K5T46_RS16590	657	+	48	20.3482	30.9714
NZ_CP081489.1	1984211	1985732	gene-K5T46_RS09375	1521	-	111	47.0553	30.9371
NZ_CP081489.1	2340072	2340168	gene-K5T46_RS11180	96	-	7	2.96745	30.9109
NZ_CP081489.1	4333770	4333962	gene-K5T46_RS20880	192	-	14	5.9349	30.9109
NZ_CP081489.1	3498812	3499334	gene-K5T46_RS16745	522	+	38	16.109	30.8602
NZ_CP081489.1	4135474	4135735	gene-K5T46_RS19890	261	-	19	8.05451	30.8602
NZ_CP081489.1	3242802	3243489	gene-K5T46_RS15485	687	+	50	21.1961	30.8531
NZ_CP081489.1	632044	632965	gene-K5T46_RS02990	921	+	67	28.4027	30.839
NZ_CP081489.1	226433	227921	gene-K5T46_RS01090	1488	-	108	45.7835	30.7685
NZ_CP081489.1	3848961	3849030	gene-K5T46_RS18490	69	+	5	2.11961	30.719
NZ_CP081489.1	3387988	3388831	gene-K5T46_RS16165	843	+	61	25.8592	30.6752
NZ_CP081489.1	428847	429789	gene-K5T46_RS01980	942	-	68	28.8267	30.6016
NZ_CP081489.1	2032777	2035369	gene-K5T46_RS09585	2592	-	187	79.2733	30.5838
NZ_CP081489.1	1489071	1489446	gene-K5T46_RS07105	375	+	27	11.4459	30.5224
NZ_CP081489.1	913679	914693	gene-K5T46_RS04375	1014	-	73	30.9463	30.519
NZ_CP081489.1	2095979	2096396	gene-K5T46_RS09900	417	+	30	12.7176	30.498
NZ_CP081489.1	4445923	4447105	gene-K5T46_RS21520	1182	+	85	36.0333	30.4851
NZ_CP081489.1	329521	330286	gene-K5T46_RS01545	765	-	55	23.3157	30.478
NZ_CP081489.1	3885197	3885434	gene-K5T46_RS18680	237	-	17	7.20667	30.4079
NZ_CP081489.1	1068284	1069667	gene-K5T46_RS05100	1383	-	99	41.9682	30.3458
NZ_CP081489.1	1221007	1221553	gene-K5T46_RS05855	546	-	39	16.5329	30.2801
NZ_CP081489.1	1825302	1826226	gene-K5T46_RS08685	924	+	66	27.9788	30.2801
NZ_CP081489.1	2172280	2173540	gene-K5T46_RS10305	1260	-	90	38.1529	30.2801
NZ_CP081489.1	2340281	2340449	gene-K5T46_RS11185	168	-	12	5.08706	30.2801
NZ_CP081489.1	2435630	2436134	gene-K5T46_RS11615	504	-	36	15.2612	30.2801
NZ_CP081489.1	2024957	2026148	gene-K5T46_RS09545	1191	-	85	36.0333	30.2547
NZ_CP081489.1	2054299	2056489	gene-K5T46_RS09700	2190	+	156	66.1318	30.1972
NZ_CP081489.1	2342094	2344692	gene-K5T46_RS11200	2598	-	185	78.4255	30.1869
NZ_CP081489.1	4258047	4258314	gene-K5T46_RS20525	267	-	19	8.05451	30.1667
NZ_CP081489.1	3450224	3450590	gene-K5T46_RS16510	366	+	26	11.022	30.1146
NZ_CP081489.1	4058701	4059772	gene-K5T46_RS19470	1071	-	76	32.218	30.0822
NZ_CP081489.1	294598	295078	gene-K5T46_RS01400	480	+	34	14.4133	30.0278
NZ_CP081489.1	1980042	1980282	gene-K5T46_RS09355	240	+	17	7.20667	30.0278
NZ_CP081489.1	2847460	2848678	gene-K5T46_RS13560	1218	+	86	36.4573	29.9321
NZ_CP081489.1	2335645	2336410	gene-K5T46_RS11165	765	-	54	22.8918	29.9239
NZ_CP081489.1	3823432	3823744	gene-K5T46_RS18265	312	+	22	9.32627	29.8919
NZ_CP081489.1	4408523	4410113	gene-K5T46_RS21345	1590	-	112	47.4792	29.8611
NZ_CP081489.1	1790984	1791482	gene-K5T46_RS08515	498	+	35	14.8373	29.7937
NZ_CP081489.1	3013774	3014173	gene-K5T46_RS14375	399	+	28	11.8698	29.7489
NZ_CP081489.1	3266541	3267795	gene-K5T46_RS15610	1254	-	88	37.3051	29.7489
NZ_CP081489.1	4154157	4155069	gene-K5T46_RS19990	912	-	64	27.131	29.7489
NZ_CP081489.1	1959360	1961046	gene-K5T46_RS09255	1686	-	118	50.0227	29.6695
NZ_CP081489.1	271585	273103	gene-K5T46_RS01300	1518	-	106	44.9357	29.6019
NZ_CP081489.1	3642014	3642215	gene-K5T46_RS17425	201	-	14	5.9349	29.5269
NZ_CP081489.1	2644032	2645253	gene-K5T46_RS12685	1221	-	85	36.0333	29.5113
NZ_CP081489.1	373578	374757	gene-K5T46_RS01760	1179	-	82	34.7616	29.4839
NZ_CP081489.1	2345358	2346408	gene-K5T46_RS11210	1050	-	73	30.9463	29.4726
NZ_CP081489.1	4356220	4357027	gene-K5T46_RS21050	807	+	56	23.7396	29.4171
NZ_CP081489.1	3996960	3997551	gene-K5T46_RS19175	591	-	41	17.3808	29.4091
NZ_CP081489.1	3627599	3628565	gene-K5T46_RS17350	966	-	67	28.4027	29.4024
NZ_CP081489.1	4194820	4195498	gene-K5T46_RS20180	678	-	47	19.9243	29.3869
NZ_CP081489.1	712123	713971	gene-K5T46_RS03375	1848	-	128	54.262	29.3625
NZ_CP081489.1	1930599	1932174	gene-K5T46_RS09160	1575	+	109	46.2074	29.3381
NZ_CP081489.1	3258927	3260028	gene-K5T46_RS15555	1101	-	76	32.218	29.2625
NZ_CP081489.1	4063193	4063961	gene-K5T46_RS19500	768	-	53	22.4678	29.255
NZ_CP081489.1	4271887	4273264	gene-K5T46_RS20585	1377	+	95	40.2725	29.2466
NZ_CP081489.1	4128272	4130072	gene-K5T46_RS19850	1800	+	124	52.5663	29.2035
NZ_CP081489.1	2384019	2384760	gene-K5T46_RS11380	741	-	51	21.62	29.1768
NZ_CP081489.1	1756397	1758170	gene-K5T46_RS08340	1773	+	122	51.7184	29.17
NZ_CP081489.1	1800856	1801423	gene-K5T46_RS08575	567	-	39	16.5329	29.1586
NZ_CP081489.1	1345830	1346790	gene-K5T46_RS06450	960	-	66	27.9788	29.1446
NZ_CP081489.1	1899197	1900070	gene-K5T46_RS09035	873	-	60	25.4353	29.1355
NZ_CP081489.1	674099	674609	gene-K5T46_RS03210	510	+	35	14.8373	29.0927
NZ_CP081489.1	3842503	3843013	gene-K5T46_RS18440	510	-	35	14.8373	29.0927
NZ_CP081489.1	3616194	3617433	gene-K5T46_RS17305	1239	-	85	36.0333	29.0826
NZ_CP081489.1	3463891	3464824	gene-K5T46_RS16595	933	+	64	27.131	29.0793
NZ_CP081489.1	3416973	3417951	gene-K5T46_RS16360	978	-	67	28.4027	29.0417
NZ_CP081489.1	1019702	1019775	id-NZ_CP081489.1:1019703..1019775	73	-	5	2.11961	29.0357
NZ_CP081489.1	3949562	3949781	gene-K5T46_RS18980	219	-	15	6.35882	29.0357
NZ_CP081489.1	603535	605959	gene-K5T46_RS02870	2424	+	166	70.371	29.0309
NZ_CP081489.1	1309496	1310651	gene-K5T46_RS06255	1155	+	79	33.4898	28.9955
NZ_CP081489.1	3555111	3555579	gene-K5T46_RS16995	468	-	32	13.5655	28.9861
NZ_CP081489.1	988810	989995	gene-K5T46_RS04715	1185	+	81	34.3376	28.9769
NZ_CP081489.1	148138	149383	gene-K5T46_RS00685	1245	+	85	36.0333	28.9424
NZ_CP081489.1	1359057	1359834	gene-K5T46_RS06505	777	-	53	22.4678	28.9161
NZ_CP081489.1	374858	374990	gene-K5T46_RS01765	132	-	9	3.81529	28.9037
NZ_CP081489.1	2254960	2255356	gene-K5T46_RS10720	396	-	27	11.4459	28.9037
NZ_CP081489.1	2318632	2320276	gene-K5T46_RS11070	1644	+	112	47.4792	28.8803
NZ_CP081489.1	754296	755589	gene-K5T46_RS03535	1293	-	88	37.3051	28.8516
NZ_CP081489.1	3921034	3921754	gene-K5T46_RS18835	720	+	49	20.7722	28.8502
NZ_CP081489.1	693202	695803	gene-K5T46_RS03300	2601	-	177	75.0341	28.8482
NZ_CP081489.1	302777	303572	gene-K5T46_RS01440	795	+	54	22.8918	28.7947
NZ_CP081489.1	1766920	1767892	gene-K5T46_RS08400	972	+	66	27.9788	28.7848
NZ_CP081489.1	2106220	2107045	gene-K5T46_RS09965	825	-	56	23.7396	28.7753
NZ_CP081489.1	1502874	1503744	gene-K5T46_RS07180	870	+	59	25.0114	28.7487
NZ_CP081489.1	4389581	4390304	gene-K5T46_RS21225	723	-	49	20.7722	28.7305
NZ_CP081489.1	3538640	3539186	gene-K5T46_RS16920	546	-	37	15.6851	28.7273
NZ_CP081489.1	2930076	2930667	gene-K5T46_RS14000	591	-	40	16.9569	28.6918
NZ_CP081489.1	4231489	4231888	gene-K5T46_RS20375	399	+	27	11.4459	28.6864
NZ_CP081489.1	407898	408669	gene-K5T46_RS01900	771	-	52	22.0439	28.5913
NZ_CP081489.1	1237081	1237852	gene-K5T46_RS05920	771	-	52	22.0439	28.5913
NZ_CP081489.1	3830562	3831096	gene-K5T46_RS18345	534	+	36	15.2612	28.579
NZ_CP081489.1	4273331	4274579	gene-K5T46_RS20590	1248	-	84	35.6094	28.5332
NZ_CP081489.1	2252229	2252988	gene-K5T46_RS10680	759	+	51	21.62	28.4848
NZ_CP081489.1	1624473	1626096	gene-K5T46_RS07725	1623	+	109	46.2074	28.4704
NZ_CP081489.1	1136942	1137404	gene-K5T46_RS05450	462	+	31	13.1416	28.445
NZ_CP081489.1	4232797	4233319	gene-K5T46_RS20390	522	+	35	14.8373	28.4239
NZ_CP081489.1	3826819	3827521	gene-K5T46_RS18300	702	+	47	19.9243	28.3822
NZ_CP081489.1	2018751	2020566	gene-K5T46_RS09520	1815	+	121	51.2945	28.2614
NZ_CP081489.1	2316402	2316567	gene-K5T46_RS11055	165	+	11	4.66314	28.2614
NZ_CP081489.1	2506572	2507112	gene-K5T46_RS12000	540	+	36	15.2612	28.2614
NZ_CP081489.1	2960147	2961017	gene-K5T46_RS14155	870	+	58	24.5875	28.2614
NZ_CP081489.1	3066999	3067854	gene-K5T46_RS14620	855	-	57	24.1635	28.2614
NZ_CP081489.1	2874586	2875699	gene-K5T46_RS13685	1113	+	74	31.3702	28.1853
NZ_CP081489.1	899906	900809	gene-K5T46_RS04295	903	+	60	25.4353	28.1675
NZ_CP081489.1	4399157	4399910	gene-K5T46_RS21285	753	+	50	21.1961	28.1488
NZ_CP081489.1	899123	899846	gene-K5T46_RS04290	723	+	48	20.3482	28.1442
NZ_CP081489.1	3693359	3694007	gene-K5T46_RS17650	648	+	43	18.2286	28.1306
NZ_CP081489.1	356369	357728	gene-K5T46_RS01675	1359	-	90	38.1529	28.0743
NZ_CP081489.1	1133075	1133528	gene-K5T46_RS05420	453	-	30	12.7176	28.0743
NZ_CP081489.1	563960	565304	gene-K5T46_RS02670	1344	+	89	37.729	28.0722
NZ_CP081489.1	1290130	1290871	gene-K5T46_RS06165	741	-	49	20.7722	28.0326
NZ_CP081489.1	555027	555738	gene-K5T46_RS02615	711	+	47	19.9243	28.0229
NZ_CP081489.1	509074	509908	gene-K5T46_RS02380	834	+	55	23.3157	27.9565
NZ_CP081489.1	2346627	2347386	gene-K5T46_RS11215	759	+	50	21.1961	27.9263
NZ_CP081489.1	3859543	3860212	gene-K5T46_RS18545	669	+	44	18.6525	27.8812
NZ_CP081489.1	1388999	1389212	gene-K5T46_RS06620	213	-	14	5.9349	27.8634
NZ_CP081489.1	3372044	3373049	gene-K5T46_RS16095	1005	-	66	27.9788	27.8396
NZ_CP081489.1	2849450	2849999	gene-K5T46_RS13570	549	+	36	15.2612	27.7981
NZ_CP081489.1	2444768	2445302	gene-K5T46_RS11685	534	+	35	14.8373	27.7851
NZ_CP081489.1	1857251	1858565	gene-K5T46_RS08850	1314	-	86	36.4573	27.7452
NZ_CP081489.1	1698052	1698649	gene-K5T46_RS08035	597	+	39	16.5329	27.6934
NZ_CP081489.1	763001	763967	gene-K5T46_RS03560	966	+	63	26.7071	27.6471
NZ_CP081489.1	1281456	1282116	gene-K5T46_RS06125	660	-	43	18.2286	27.6191
NZ_CP081489.1	2637729	2638389	gene-K5T46_RS12655	660	-	43	18.2286	27.6191
NZ_CP081489.1	2629653	2630436	gene-K5T46_RS12615	783	-	51	21.62	27.6117
NZ_CP081489.1	719376	720699	gene-K5T46_RS03390	1323	-	86	36.4573	27.5565
NZ_CP081489.1	3810913	3811390	gene-K5T46_RS18190	477	+	31	13.1416	27.5505
NZ_CP081489.1	3494898	3495591	gene-K5T46_RS16725	693	+	45	19.0765	27.5274
NZ_CP081489.1	3887035	3887761	gene-K5T46_RS18695	726	-	47	19.9243	27.444
NZ_CP081489.1	1490417	1491329	gene-K5T46_RS07115	912	-	59	25.0114	27.4247
NZ_CP081489.1	896073	897759	gene-K5T46_RS04270	1686	-	109	46.2074	27.4066
NZ_CP081489.1	3999378	4000152	gene-K5T46_RS19190	774	-	50	21.1961	27.3851
NZ_CP081489.1	1716076	1716742	gene-K5T46_RS08135	666	+	43	18.2286	27.3703
NZ_CP081489.1	2564254	2564440	gene-K5T46_RS12275	186	-	12	5.08706	27.3498
NZ_CP081489.1	2967598	2968900	gene-K5T46_RS14190	1302	+	84	35.6094	27.3498
NZ_CP081489.1	3263820	3264627	gene-K5T46_RS15585	807	-	52	22.0439	27.3159
NZ_CP081489.1	840874	841993	gene-K5T46_RS03975	1119	+	72	30.5224	27.2765
NZ_CP081489.1	2132824	2133928	gene-K5T46_RS10100	1104	-	71	30.0984	27.2631
NZ_CP081489.1	1401753	1402500	gene-K5T46_RS06680	747	+	48	20.3482	27.2399
NZ_CP081489.1	2365007	2365832	gene-K5T46_RS11295	825	-	53	22.4678	27.2337
NZ_CP081489.1	3946813	3948619	gene-K5T46_RS18965	1806	+	116	49.1749	27.2286
NZ_CP081489.1	296911	299512	gene-K5T46_RS01415	2601	+	167	70.7949	27.2183
NZ_CP081489.1	146557	147523	gene-K5T46_RS00680	966	+	62	26.2831	27.2082
NZ_CP081489.1	3834604	3834994	gene-K5T46_RS18385	390	+	25	10.598	27.1745
NZ_CP081489.1	997633	999025	gene-K5T46_RS04755	1392	-	89	37.729	27.1042
NZ_CP081489.1	2332412	2332631	gene-K5T46_RS11140	219	+	14	5.9349	27.1
NZ_CP081489.1	3114994	3115651	gene-K5T46_RS14855	657	+	42	17.8047	27.1
NZ_CP081489.1	1729075	1729654	gene-K5T46_RS08210	579	+	37	15.6851	27.09
NZ_CP081489.1	4402867	4403587	gene-K5T46_RS21305	720	-	46	19.5004	27.0839
NZ_CP081489.1	1473366	1473993	gene-K5T46_RS07000	627	-	40	16.9569	27.0444
NZ_CP081489.1	3332193	3333165	gene-K5T46_RS15900	972	-	62	26.2831	27.0403
NZ_CP081489.1	89853	91014	gene-K5T46_RS00425	1161	+	74	31.3702	27.02
NZ_CP081489.1	3184567	3185179	gene-K5T46_RS15215	612	+	39	16.5329	27.0146
NZ_CP081489.1	1456292	1457003	gene-K5T46_RS06940	711	-	45	19.0765	26.8305
NZ_CP081489.1	3642563	3644414	gene-K5T46_RS17435	1851	-	117	49.5988	26.7957
NZ_CP081489.1	2285144	2285873	gene-K5T46_RS10905	729	+	46	19.5004	26.7495
NZ_CP081489.1	95457	97962	gene-K5T46_RS00460	2505	+	158	66.9796	26.7384
NZ_CP081489.1	1078303	1078747	gene-K5T46_RS05150	444	-	28	11.8698	26.7338
NZ_CP081489.1	4187198	4189294	gene-K5T46_RS20135	2096	+	132	55.9576	26.6973
NZ_CP081489.1	273186	273885	gene-K5T46_RS01305	699	+	44	18.6525	26.6846
NZ_CP081489.1	443673	444531	gene-K5T46_RS02075	858	+	54	22.8918	26.6804
NZ_CP081489.1	3620268	3621126	gene-K5T46_RS17320	858	+	54	22.8918	26.6804
NZ_CP081489.1	1716803	1718015	gene-K5T46_RS08140	1212	-	76	32.218	26.5825
NZ_CP081489.1	50221	50716	gene-K5T46_RS00225	495	-	31	13.1416	26.5486
NZ_CP081489.1	2423804	2424764	gene-K5T46_RS11560	960	+	60	25.4353	26.4951
NZ_CP081489.1	2440659	2441076	gene-K5T46_RS11650	417	-	26	11.022	26.4316
NZ_CP081489.1	311153	313544	gene-K5T46_RS01490	2391	+	149	63.1643	26.4175
NZ_CP081489.1	2501586	2502228	gene-K5T46_RS11975	642	+	40	16.9569	26.4126
NZ_CP081489.1	2229836	2230880	gene-K5T46_RS10585	1044	-	65	27.5549	26.3936
NZ_CP081489.1	1839471	1839921	gene-K5T46_RS08780	450	-	28	11.8698	26.3773
NZ_CP081489.1	746357	747788	gene-K5T46_RS03505	1431	-	89	37.729	26.3655
NZ_CP081489.1	4053653	4054634	gene-K5T46_RS19440	981	-	61	25.8592	26.3601
NZ_CP081489.1	3671404	3672595	gene-K5T46_RS17565	1191	+	74	31.3702	26.3394
NZ_CP081489.1	4467987	4470873	gene-K5T46_RS21650	2886	+	179	75.882	26.2931
NZ_CP081489.1	2330966	2331095	gene-K5T46_RS11125	129	-	8	3.39137	26.2897
NZ_CP081489.1	3644430	3644946	gene-K5T46_RS17440	516	-	32	13.5655	26.2897
NZ_CP081489.1	4072517	4072808	gene-K5T46_RS19550	291	-	18	7.63059	26.222
NZ_CP081489.1	1804091	1805063	gene-K5T46_RS08595	972	-	60	25.4353	26.168
NZ_CP081489.1	1939036	1939198	gene-K5T46_RS09190	162	-	10	4.23922	26.168
NZ_CP081489.1	2626296	2627187	gene-K5T46_RS12595	891	-	55	23.3157	26.168
NZ_CP081489.1	3494497	3494902	gene-K5T46_RS16720	405	+	25	10.598	26.168
NZ_CP081489.1	4407237	4407399	gene-K5T46_RS21335	162	-	10	4.23922	26.168
NZ_CP081489.1	540231	541074	gene-K5T46_RS02540	843	-	52	22.0439	26.1494
NZ_CP081489.1	515186	515738	gene-K5T46_RS02415	552	-	34	14.4133	26.1111
NZ_CP081489.1	1326793	1327069	gene-K5T46_RS06355	276	+	17	7.20667	26.1111
NZ_CP081489.1	3241967	3242714	gene-K5T46_RS15480	747	+	46	19.5004	26.1049
NZ_CP081489.1	1958127	1958598	gene-K5T46_RS09245	471	-	29	12.2937	26.1013
NZ_CP081489.1	2220284	2221730	gene-K5T46_RS10555	1446	-	89	37.729	26.092
NZ_CP081489.1	3245453	3246737	gene-K5T46_RS15500	1284	-	79	33.4898	26.0824
NZ_CP081489.1	994312	995647	gene-K5T46_RS04745	1335	-	82	34.7616	26.0386
NZ_CP081489.1	3968469	3969399	gene-K5T46_RS19075	930	+	57	24.1635	25.9823
NZ_CP081489.1	3152358	3153813	gene-K5T46_RS15025	1455	+	89	37.729	25.9306
NZ_CP081489.1	1264105	1265086	gene-K5T46_RS06035	981	+	60	25.4353	25.9279
NZ_CP081489.1	2888961	2889288	gene-K5T46_RS13805	327	-	20	8.47843	25.9279
NZ_CP081489.1	3014984	3016685	gene-K5T46_RS14385	1701	-	104	44.0878	25.9188
NZ_CP081489.1	2628877	2629564	gene-K5T46_RS12610	687	-	42	17.8047	25.9166
NZ_CP081489.1	2568852	2570376	gene-K5T46_RS12305	1524	-	93	39.4247	25.8692
NZ_CP081489.1	1317888	1318593	gene-K5T46_RS06300	705	+	43	18.2286	25.8562
NZ_CP081489.1	2113955	2115152	gene-K5T46_RS10005	1197	+	73	30.9463	25.8532
NZ_CP081489.1	206203	206794	gene-K5T46_RS00985	591	+	36	15.2612	25.8226
NZ_CP081489.1	2762878	2763601	gene-K5T46_RS13195	723	+	44	18.6525	25.7988
NZ_CP081489.1	2108114	2110661	gene-K5T46_RS09985	2547	-	155	65.7078	25.7981
NZ_CP081489.1	417157	420379	gene-K5T46_RS01940	3222	-	196	83.0886	25.7879
NZ_CP081489.1	2105516	2106224	gene-K5T46_RS09960	708	-	43	18.2286	25.7466
NZ_CP081489.1	554054	554861	gene-K5T46_RS02610	807	+	49	20.7722	25.74
NZ_CP081489.1	1570417	1572661	gene-K5T46_RS07490	2244	-	136	57.6533	25.6922
NZ_CP081489.1	1929458	1930283	gene-K5T46_RS09155	825	+	50	21.1961	25.6922
NZ_CP081489.1	2135753	2136083	gene-K5T46_RS10115	330	-	20	8.47843	25.6922
NZ_CP081489.1	3389118	3389250	gene-K5T46_RS16175	132	+	8	3.39137	25.6922
NZ_CP081489.1	642457	643531	gene-K5T46_RS03030	1074	+	65	27.5549	25.6563
NZ_CP081489.1	3212180	3212891	gene-K5T46_RS15315	711	-	43	18.2286	25.638
NZ_CP081489.1	262833	263628	gene-K5T46_RS01265	795	+	48	20.3482	25.5953
NZ_CP081489.1	1498418	1499843	gene-K5T46_RS07155	1425	+	86	36.4573	25.584
NZ_CP081489.1	1174684	1175347	gene-K5T46_RS05605	663	+	40	16.9569	25.576
NZ_CP081489.1	2848688	2849435	gene-K5T46_RS13565	747	+	45	19.0765	25.5374
NZ_CP081489.1	3047427	3048390	gene-K5T46_RS14535	963	+	58	24.5875	25.5321
NZ_CP081489.1	2066412	2067840	gene-K5T46_RS09760	1428	-	86	36.4573	25.5303
NZ_CP081489.1	3322493	3324356	gene-K5T46_RS15845	1863	+	112	47.4792	25.4854
NZ_CP081489.1	4101066	4101516	gene-K5T46_RS19715	450	+	27	11.4459	25.4353
NZ_CP081489.1	3234024	3234408	gene-K5T46_RS15430	384	+	23	9.7502	25.3911
NZ_CP081489.1	2545643	2547380	gene-K5T46_RS12175	1737	+	104	44.0878	25.3816
NZ_CP081489.1	254441	255794	gene-K5T46_RS01225	1353	-	81	34.3376	25.3789
NZ_CP081489.1	704662	705865	gene-K5T46_RS03345	1203	+	72	30.5224	25.3719
NZ_CP081489.1	3891796	3894088	gene-K5T46_RS18725	2292	+	137	58.0773	25.3391
NZ_CP081489.1	1323604	1324324	gene-K5T46_RS06335	720	-	43	18.2286	25.3175
NZ_CP081489.1	3822775	3823195	gene-K5T46_RS18260	420	+	25	10.598	25.2334
NZ_CP081489.1	3927805	3927973	gene-K5T46_RS18870	168	-	10	4.23922	25.2334
NZ_CP081489.1	4116242	4116662	gene-K5T46_RS19780	420	-	25	10.598	25.2334
NZ_CP081489.1	3825018	3825321	gene-K5T46_RS18280	303	+	18	7.63059	25.1835
NZ_CP081489.1	3024751	3025324	gene-K5T46_RS14425	573	+	34	14.4133	25.1542
NZ_CP081489.1	3373045	3374059	gene-K5T46_RS16100	1014	-	60	25.4353	25.0841
NZ_CP081489.1	2180425	2180983	gene-K5T46_RS10360	558	+	33	13.9894	25.0706
NZ_CP081489.1	1201550	1202210	gene-K5T46_RS05760	660	-	39	16.5329	25.0499
NZ_CP081489.1	1785096	1785333	gene-K5T46_RS08495	237	-	14	5.9349	25.0418
NZ_CP081489.1	1584408	1585527	gene-K5T46_RS07555	1119	-	66	27.9788	25.0034
NZ_CP081489.1	1016898	1018560	gene-K5T46_RS04855	1662	-	98	41.5443	24.9966
NZ_CP081489.1	2098004	2098496	gene-K5T46_RS09920	492	+	29	12.2937	24.9872
NZ_CP081489.1	1541562	1542597	gene-K5T46_RS07355	1035	-	61	25.8592	24.9847
NZ_CP081489.1	1668200	1669304	gene-K5T46_RS07885	1104	-	65	27.5549	24.9591
NZ_CP081489.1	86713	87343	gene-K5T46_RS00410	630	-	37	15.6851	24.897
NZ_CP081489.1	4222739	4223318	gene-K5T46_RS20320	579	+	34	14.4133	24.8935
NZ_CP081489.1	174321	175260	gene-K5T46_RS00825	939	-	55	23.3157	24.8303
NZ_CP081489.1	2658803	2659367	gene-K5T46_RS12760	564	-	33	13.9894	24.8039
NZ_CP081489.1	2712862	2713717	gene-K5T46_RS12985	855	-	50	21.1961	24.7907
NZ_CP081489.1	2004741	2005683	gene-K5T46_RS09460	942	-	55	23.3157	24.7513
NZ_CP081489.1	2855448	2856819	gene-K5T46_RS13600	1371	+	80	33.9137	24.7365
NZ_CP081489.1	2159777	2161115	gene-K5T46_RS10240	1338	-	78	33.0659	24.7129
NZ_CP081489.1	2836726	2838580	gene-K5T46_RS13520	1854	+	108	45.7835	24.6945
NZ_CP081489.1	3928219	3929593	gene-K5T46_RS18875	1374	-	80	33.9137	24.6825
NZ_CP081489.1	3769707	3770481	gene-K5T46_RS18010	774	+	45	19.0765	24.6466
NZ_CP081489.1	1121121	1122222	gene-K5T46_RS05370	1101	-	64	27.131	24.6421
NZ_CP081489.1	444530	446543	gene-K5T46_RS02080	2013	+	117	49.5988	24.6393
NZ_CP081489.1	3969494	3970991	gene-K5T46_RS19080	1497	-	87	36.8812	24.6367
NZ_CP081489.1	3692969	3693296	gene-K5T46_RS17645	327	+	19	8.05451	24.6315
NZ_CP081489.1	2813426	2814149	gene-K5T46_RS13430	723	-	42	17.8047	24.6261
NZ_CP081489.1	2219227	2220157	gene-K5T46_RS10550	930	+	54	22.8918	24.6148
NZ_CP081489.1	4064943	4066305	gene-K5T46_RS19515	1362	-	79	33.4898	24.5887
NZ_CP081489.1	1101062	1101476	gene-K5T46_RS05270	414	+	24	10.1741	24.5752
NZ_CP081489.1	1950996	1952085	gene-K5T46_RS09220	1089	+	63	26.7071	24.5244
NZ_CP081489.1	2763728	2767481	gene-K5T46_RS13200	3753	-	217	91.991	24.5113
NZ_CP081489.1	1028426	1029239	gene-K5T46_RS04915	813	-	47	19.9243	24.5072
NZ_CP081489.1	3874968	3875418	gene-K5T46_RS18635	450	-	26	11.022	24.4932
NZ_CP081489.1	251372	251858	gene-K5T46_RS01215	486	-	28	11.8698	24.4235
NZ_CP081489.1	2660046	2660532	gene-K5T46_RS12765	486	-	28	11.8698	24.4235
NZ_CP081489.1	446543	447065	gene-K5T46_RS02085	522	-	30	12.7176	24.3633
NZ_CP081489.1	3030626	3033776	gene-K5T46_RS14470	3150	-	181	76.7298	24.3587
NZ_CP081489.1	1203505	1204237	gene-K5T46_RS05775	732	-	42	17.8047	24.3234
NZ_CP081489.1	1101410	1102578	gene-K5T46_RS05275	1168	-	67	28.4027	24.3174
NZ_CP081489.1	4225157	4225436	gene-K5T46_RS20335	279	-	16	6.78274	24.3109
NZ_CP081489.1	3453205	3453589	gene-K5T46_RS16535	384	-	22	9.32627	24.2872
NZ_CP081489.1	3507672	3508248	gene-K5T46_RS16795	576	+	33	13.9894	24.2872
NZ_CP081489.1	2879965	2880262	gene-K5T46_RS13730	297	-	17	7.20667	24.2649
NZ_CP081489.1	1352576	1353677	gene-K5T46_RS06475	1101	+	63	26.7071	24.2571
NZ_CP081489.1	2556528	2556948	gene-K5T46_RS12215	420	-	24	10.1741	24.2241
NZ_CP081489.1	2876945	2877470	gene-K5T46_RS13700	525	+	30	12.7176	24.2241
NZ_CP081489.1	3072834	3073464	gene-K5T46_RS14645	630	+	36	15.2612	24.2241
NZ_CP081489.1	1020014	1020347	gene-K5T46_RS04870	333	+	19	8.05451	24.1877
NZ_CP081489.1	3826469	3826802	gene-K5T46_RS18295	333	+	19	8.05451	24.1877
NZ_CP081489.1	1282543	1283437	gene-K5T46_RS06135	894	+	51	21.62	24.1834
NZ_CP081489.1	3770531	3770759	gene-K5T46_RS18015	228	+	13	5.51098	24.171
NZ_CP081489.1	3520547	3521846	gene-K5T46_RS16850	1299	-	74	31.3702	24.1495
NZ_CP081489.1	2984343	2985063	gene-K5T46_RS14265	720	+	41	17.3808	24.14
NZ_CP081489.1	1204416	1206858	gene-K5T46_RS05780	2442	-	139	58.9251	24.1299
NZ_CP081489.1	157163	157532	gene-K5T46_RS00730	369	+	21	8.90235	24.1256
NZ_CP081489.1	193536	194397	gene-K5T46_RS00925	861	+	49	20.7722	24.1256
NZ_CP081489.1	202869	203730	gene-K5T46_RS00970	861	-	49	20.7722	24.1256
NZ_CP081489.1	1295462	1296482	gene-K5T46_RS06190	1020	-	58	24.5875	24.1053
NZ_CP081489.1	107758	109060	gene-K5T46_RS00510	1302	-	74	31.3702	24.0939
NZ_CP081489.1	1495577	1496369	gene-K5T46_RS07140	792	-	45	19.0765	24.0865
NZ_CP081489.1	531006	531675	gene-K5T46_RS02500	669	+	38	16.109	24.0793
NZ_CP081489.1	1314668	1315619	gene-K5T46_RS06280	951	+	54	22.8918	24.0713
NZ_CP081489.1	3681388	3682921	gene-K5T46_RS17595	1533	+	87	36.8812	24.0582
NZ_CP081489.1	1302434	1304426	gene-K5T46_RS06225	1992	-	113	47.9031	24.0478
NZ_CP081489.1	3601316	3602480	gene-K5T46_RS17245	1164	-	66	27.9788	24.0368
NZ_CP081489.1	4338777	4339077	gene-K5T46_RS20940	300	+	17	7.20667	24.0222
NZ_CP081489.1	852283	853519	gene-K5T46_RS04020	1236	-	70	29.6745	24.0085
NZ_CP081489.1	316796	317591	gene-K5T46_RS01510	795	+	45	19.0765	23.9956
NZ_CP081489.1	3155501	3157145	gene-K5T46_RS15040	1644	-	93	39.4247	23.981
NZ_CP081489.1	3708343	3708679	gene-K5T46_RS17725	336	+	19	8.05451	23.9718
NZ_CP081489.1	1447183	1448086	gene-K5T46_RS06905	903	+	51	21.62	23.9424
NZ_CP081489.1	842051	842972	gene-K5T46_RS03980	921	-	52	22.0439	23.9348
NZ_CP081489.1	1579606	1581079	gene-K5T46_RS07535	1473	-	83	35.1855	23.887
NZ_CP081489.1	3055975	3056455	gene-K5T46_RS14565	480	-	27	11.4459	23.8456
NZ_CP081489.1	2630656	2631439	gene-K5T46_RS12620	783	-	44	18.6525	23.8219
NZ_CP081489.1	158756	159149	gene-K5T46_RS00750	393	+	22	9.32627	23.731
NZ_CP081489.1	4073405	4073888	gene-K5T46_RS19560	483	+	27	11.4459	23.6975
NZ_CP081489.1	2438588	2439143	gene-K5T46_RS11635	555	+	31	13.1416	23.6785
NZ_CP081489.1	1179433	1180225	gene-K5T46_RS05630	792	+	44	18.6525	23.5512
NZ_CP081489.1	1255610	1255736	gene-K5T46_RS05980	126	+	7	2.96745	23.5512
NZ_CP081489.1	1327133	1328213	gene-K5T46_RS06360	1080	+	60	25.4353	23.5512
NZ_CP081489.1	1391768	1392794	gene-K5T46_RS06630	1026	+	57	24.1635	23.5512
NZ_CP081489.1	3379046	3379100	gene-K5T46_RS16125	54	-	3	1.27176	23.5512
NZ_CP081489.1	3536440	3536890	gene-K5T46_RS16905	450	-	25	10.598	23.5512
NZ_CP081489.1	3112327	3114889	gene-K5T46_RS14850	2562	+	142	60.1969	23.496
NZ_CP081489.1	873285	874494	gene-K5T46_RS04110	1209	-	67	28.4027	23.4928
NZ_CP081489.1	2401911	2403825	gene-K5T46_RS11470	1914	+	106	44.9357	23.4774
NZ_CP081489.1	2022687	2024277	gene-K5T46_RS09535	1590	+	88	37.3051	23.4623
NZ_CP081489.1	3639755	3640532	gene-K5T46_RS17415	777	-	43	18.2286	23.4603
NZ_CP081489.1	1466645	1467278	gene-K5T46_RS06980	633	+	35	14.8373	23.4396
NZ_CP081489.1	3496087	3497353	gene-K5T46_RS16735	1266	+	70	29.6745	23.4396
NZ_CP081489.1	2584254	2585376	gene-K5T46_RS12400	1122	+	62	26.2831	23.4253
NZ_CP081489.1	934406	935423	gene-K5T46_RS04460	1017	-	56	23.7396	23.3428
NZ_CP081489.1	230720	231374	gene-K5T46_RS01110	654	+	36	15.2612	23.3351
NZ_CP081489.1	4300024	4300351	gene-K5T46_RS20735	327	-	18	7.63059	23.3351
NZ_CP081489.1	3669823	3671077	gene-K5T46_RS17560	1254	-	69	29.2506	23.3258
NZ_CP081489.1	3853941	3855597	gene-K5T46_RS18515	1656	+	91	38.5769	23.2952
NZ_CP081489.1	175574	175793	gene-K5T46_RS00830	219	+	12	5.08706	23.2286
NZ_CP081489.1	2178311	2179298	gene-K5T46_RS10345	987	+	54	22.8918	23.1933
NZ_CP081489.1	724162	724345	gene-K5T46_RS03415	183	-	10	4.23922	23.1651
NZ_CP081489.1	598499	598847	gene-K5T46_RS02825	348	+	19	8.05451	23.1451
NZ_CP081489.1	3033798	3034992	gene-K5T46_RS14475	1194	-	65	27.5549	23.0778
NZ_CP081489.1	2226118	2227588	gene-K5T46_RS10565	1470	-	80	33.9137	23.0706
NZ_CP081489.1	3248755	3250336	gene-K5T46_RS15515	1581	-	86	36.4573	23.0596
NZ_CP081489.1	898435	898693	gene-K5T46_RS04280	258	-	14	5.9349	23.0035
NZ_CP081489.1	1893082	1893598	gene-K5T46_RS09005	516	+	28	11.8698	23.0035
NZ_CP081489.1	541081	541432	gene-K5T46_RS02545	351	-	19	8.05451	22.9473
NZ_CP081489.1	270031	271456	gene-K5T46_RS01295	1425	-	77	32.642	22.9066
NZ_CP081489.1	3457848	3458607	gene-K5T46_RS16565	759	+	41	17.3808	22.8996
NZ_CP081489.1	1187677	1187992	gene-K5T46_RS05670	315	-	17	7.20667	22.8783
NZ_CP081489.1	2134167	2135427	gene-K5T46_RS10105	1260	-	68	28.8267	22.8783
NZ_CP081489.1	2738976	2740014	gene-K5T46_RS13125	1038	+	56	23.7396	22.8705
NZ_CP081489.1	3235782	3236970	gene-K5T46_RS15445	1188	+	64	27.131	22.8375
NZ_CP081489.1	3367947	3368244	gene-K5T46_RS16070	297	+	16	6.78274	22.8375
NZ_CP081489.1	2285847	2286813	gene-K5T46_RS10910	966	-	52	22.0439	22.8198
NZ_CP081489.1	1695735	1696404	gene-K5T46_RS08025	669	-	36	15.2612	22.8119
NZ_CP081489.1	734922	736206	gene-K5T46_RS03460	1284	-	69	29.2506	22.7808
NZ_CP081489.1	4391164	4392523	gene-K5T46_RS21235	1359	+	73	30.9463	22.7714
NZ_CP081489.1	3111687	3112041	gene-K5T46_RS14840	354	-	19	8.05451	22.7529
NZ_CP081489.1	423968	424919	gene-K5T46_RS01960	951	-	51	21.62	22.734
NZ_CP081489.1	4369335	4369764	gene-K5T46_RS21120	429	+	23	9.7502	22.7277
NZ_CP081489.1	952682	954791	gene-K5T46_RS04565	2109	+	113	47.9031	22.7137
NZ_CP081489.1	2808168	2808672	gene-K5T46_RS13400	504	+	27	11.4459	22.7101
NZ_CP081489.1	1362502	1365154	gene-K5T46_RS06520	2652	+	142	60.1969	22.6987
NZ_CP081489.1	2186126	2186855	gene-K5T46_RS10400	729	-	39	16.5329	22.6789
NZ_CP081489.1	2786857	2787400	gene-K5T46_RS13290	543	-	29	12.2937	22.6404
NZ_CP081489.1	2263706	2264942	gene-K5T46_RS10805	1236	+	66	27.9788	22.6366
NZ_CP081489.1	3717462	3718530	gene-K5T46_RS17760	1068	+	57	24.1635	22.625
NZ_CP081489.1	538012	538762	gene-K5T46_RS02530	750	-	40	16.9569	22.6091
NZ_CP081489.1	3855736	3855961	gene-K5T46_RS18520	225	+	12	5.08706	22.6091
NZ_CP081489.1	3414314	3415478	gene-K5T46_RS16340	1164	+	62	26.2831	22.58
NZ_CP081489.1	3585076	3587761	gene-K5T46_RS17170	2685	-	143	60.6208	22.5776
NZ_CP081489.1	1662458	1663754	gene-K5T46_RS07865	1296	-	69	29.2506	22.5699
NZ_CP081489.1	3793892	3794324	gene-K5T46_RS18115	432	+	23	9.7502	22.5699
NZ_CP081489.1	3675240	3676668	gene-K5T46_RS17585	1428	-	76	32.218	22.5617
NZ_CP081489.1	3355751	3355845	id-NZ_CP081489.1:3355752..3355845	94	+	5	2.11961	22.549
NZ_CP081489.1	3149573	3150626	gene-K5T46_RS15015	1053	-	56	23.7396	22.5447
NZ_CP081489.1	4374814	4375924	gene-K5T46_RS21150	1110	+	59	25.0114	22.5328
NZ_CP081489.1	1684656	1685973	gene-K5T46_RS07975	1317	-	70	29.6745	22.5319
NZ_CP081489.1	3401078	3402473	gene-K5T46_RS16225	1395	-	74	31.3702	22.4876
NZ_CP081489.1	295447	296032	gene-K5T46_RS01405	585	+	31	13.1416	22.4642
NZ_CP081489.1	4298947	4299853	gene-K5T46_RS20730	906	+	48	20.3482	22.4594
NZ_CP081489.1	613639	614470	gene-K5T46_RS02905	831	-	44	18.6525	22.4459
NZ_CP081489.1	2065562	2066318	gene-K5T46_RS09755	756	-	40	16.9569	22.4297
NZ_CP081489.1	2912041	2912986	gene-K5T46_RS13930	945	+	50	21.1961	22.4297
NZ_CP081489.1	1618124	1620260	gene-K5T46_RS07700	2136	+	113	47.9031	22.4266
NZ_CP081489.1	2909985	2911518	gene-K5T46_RS13925	1533	-	81	34.3376	22.399
NZ_CP081489.1	141705	142122	gene-K5T46_RS00650	417	-	22	9.32627	22.3652
NZ_CP081489.1	2099639	2099696	gene-K5T46_RS09930	57	-	3	1.27176	22.3117
NZ_CP081489.1	2972437	2973976	gene-K5T46_RS14215	1539	+	81	34.3376	22.3117
NZ_CP081489.1	3770762	3771332	gene-K5T46_RS18020	570	-	30	12.7176	22.3117
NZ_CP081489.1	1577954	1579325	gene-K5T46_RS07525	1371	+	72	30.5224	22.2628
NZ_CP081489.1	1440108	1440546	gene-K5T46_RS06865	438	-	23	9.7502	22.2607
NZ_CP081489.1	825417	825684	gene-K5T46_RS03895	267	-	14	5.9349	22.2281
NZ_CP081489.1	3978205	3979312	gene-K5T46_RS19100	1107	-	58	24.5875	22.2109
NZ_CP081489.1	2617117	2618320	gene-K5T46_RS12550	1203	+	63	26.7071	22.2004
NZ_CP081489.1	1572842	1572995	gene-K5T46_RS07495	153	-	8	3.39137	22.1658
NZ_CP081489.1	3695548	3696772	gene-K5T46_RS17665	1224	-	64	27.131	22.1658
NZ_CP081489.1	4235093	4235552	gene-K5T46_RS20400	459	+	24	10.1741	22.1658
NZ_CP081489.1	2157032	2158658	gene-K5T46_RS10225	1626	-	85	36.0333	22.1607
NZ_CP081489.1	3569439	3571104	gene-K5T46_RS17085	1665	+	87	36.8812	22.1509
NZ_CP081489.1	984696	984945	gene-K5T46_RS04685	249	+	13	5.51098	22.1325
NZ_CP081489.1	2003815	2004754	gene-K5T46_RS09455	939	-	49	20.7722	22.1216
NZ_CP081489.1	310411	310948	gene-K5T46_RS01485	537	-	28	11.8698	22.1039
NZ_CP081489.1	1429503	1430559	gene-K5T46_RS06820	1056	-	55	23.3157	22.0792
NZ_CP081489.1	940623	941433	gene-K5T46_RS04490	810	-	42	17.8047	21.9811
NZ_CP081489.1	1412729	1413404	gene-K5T46_RS06745	675	-	35	14.8373	21.9811
NZ_CP081489.1	1800050	1800860	gene-K5T46_RS08570	810	+	42	17.8047	21.9811
NZ_CP081489.1	2161107	2161956	gene-K5T46_RS10245	849	-	44	18.6525	21.97
NZ_CP081489.1	568554	569598	gene-K5T46_RS02685	1044	-	54	22.8918	21.927
NZ_CP081489.1	627572	627746	gene-K5T46_RS02965	174	-	9	3.81529	21.927
NZ_CP081489.1	3619521	3620256	gene-K5T46_RS17315	735	+	38	16.109	21.917
NZ_CP081489.1	2345071	2345323	gene-K5T46_RS11205	252	+	13	5.51098	21.869
NZ_CP081489.1	3721261	3722386	gene-K5T46_RS17770	1125	+	58	24.5875	21.8555
NZ_CP081489.1	3640673	3641957	gene-K5T46_RS17420	1284	-	66	27.9788	21.7904
NZ_CP081489.1	275811	277233	gene-K5T46_RS01330	1422	-	73	30.9463	21.7625
NZ_CP081489.1	1728722	1729073	gene-K5T46_RS08205	351	+	18	7.63059	21.7396
NZ_CP081489.1	2264993	2265929	gene-K5T46_RS10810	936	+	48	20.3482	21.7396
NZ_CP081489.1	4130087	4131062	gene-K5T46_RS19855	975	+	50	21.1961	21.7396
NZ_CP081489.1	263689	266362	gene-K5T46_RS01270	2673	+	137	58.0773	21.7274
NZ_CP081489.1	490702	491815	gene-K5T46_RS02300	1113	+	57	24.1635	21.7103
NZ_CP081489.1	2060836	2061619	gene-K5T46_RS09725	783	-	40	16.9569	21.6563
NZ_CP081489.1	3082595	3082967	gene-K5T46_RS14700	372	+	19	8.05451	21.6519
NZ_CP081489.1	2159217	2159550	gene-K5T46_RS10235	333	-	17	7.20667	21.6416
NZ_CP081489.1	3124128	3124755	gene-K5T46_RS14900	627	-	32	13.5655	21.6355
NZ_CP081489.1	3193042	3195826	gene-K5T46_RS15250	2784	-	142	60.1969	21.6224
NZ_CP081489.1	330826	332200	gene-K5T46_RS01550	1374	+	70	29.6745	21.5972
NZ_CP081489.1	1579321	1579537	gene-K5T46_RS07530	216	-	11	4.66314	21.5886
NZ_CP081489.1	3743715	3744363	gene-K5T46_RS17875	648	+	33	13.9894	21.5886
NZ_CP081489.1	2207523	2207916	gene-K5T46_RS10485	393	-	20	8.47843	21.5736
NZ_CP081489.1	1558543	1559605	gene-K5T46_RS07440	1062	-	54	22.8918	21.5553
NZ_CP081489.1	3239785	3241831	gene-K5T46_RS15475	2046	-	104	44.0878	21.5483
NZ_CP081489.1	3608382	3609327	gene-K5T46_RS17265	945	-	48	20.3482	21.5325
NZ_CP081489.1	3138672	3139323	gene-K5T46_RS14985	651	+	33	13.9894	21.4891
NZ_CP081489.1	2543923	2544535	gene-K5T46_RS12165	612	-	31	13.1416	21.4732
NZ_CP081489.1	4239115	4239826	gene-K5T46_RS20435	711	+	36	15.2612	21.4644
NZ_CP081489.1	3262121	3263327	gene-K5T46_RS15575	1206	+	61	25.8592	21.4421
NZ_CP081489.1	32796	34518	gene-K5T46_RS00135	1722	+	87	36.8812	21.4176
NZ_CP081489.1	1840279	1841170	gene-K5T46_RS08785	891	+	45	19.0765	21.4102
NZ_CP081489.1	2012632	2014099	gene-K5T46_RS09495	1467	+	74	31.3702	21.3839
NZ_CP081489.1	533976	534771	gene-K5T46_RS02515	795	-	40	16.9569	21.3294
NZ_CP081489.1	117607	118621	gene-K5T46_RS00560	1014	-	51	21.62	21.3215
NZ_CP081489.1	1878386	1878923	gene-K5T46_RS08940	537	-	27	11.4459	21.3145
NZ_CP081489.1	478180	479593	gene-K5T46_RS02240	1413	+	71	30.0984	21.3011
NZ_CP081489.1	465939	467313	gene-K5T46_RS02175	1374	+	69	29.2506	21.2886
NZ_CP081489.1	946114	946831	gene-K5T46_RS04530	717	-	36	15.2612	21.2848
NZ_CP081489.1	3183078	3183816	gene-K5T46_RS15205	738	+	37	15.6851	21.2535
NZ_CP081489.1	1029353	1029752	gene-K5T46_RS04920	399	-	20	8.47843	21.2492
NZ_CP081489.1	1165733	1166372	gene-K5T46_RS05560	639	+	32	13.5655	21.2292
NZ_CP081489.1	1177951	1178590	gene-K5T46_RS05620	639	+	32	13.5655	21.2292
NZ_CP081489.1	3599778	3601317	gene-K5T46_RS17240	1539	-	77	32.642	21.2099
NZ_CP081489.1	833687	834347	gene-K5T46_RS03930	660	-	33	13.9894	21.1961
NZ_CP081489.1	2282852	2283752	gene-K5T46_RS10890	900	-	45	19.0765	21.1961
NZ_CP081489.1	3052848	3054069	gene-K5T46_RS14555	1221	-	61	25.8592	21.1787
NZ_CP081489.1	542925	543246	gene-K5T46_RS02555	321	-	16	6.78274	21.13
NZ_CP081489.1	4225438	4225699	gene-K5T46_RS20340	261	-	13	5.51098	21.1149
NZ_CP081489.1	4435333	4435675	gene-K5T46_RS21470	342	-	17	7.20667	21.0721
NZ_CP081489.1	78181	78664	gene-K5T46_RS00355	483	-	24	10.1741	21.0644
NZ_CP081489.1	3611144	3612395	gene-K5T46_RS17275	1251	-	62	26.2831	21.0097
NZ_CP081489.1	687418	688528	gene-K5T46_RS03265	1110	+	55	23.3157	21.0051
NZ_CP081489.1	4288160	4288907	gene-K5T46_RS20670	747	-	37	15.6851	20.9975
NZ_CP081489.1	85438	86266	gene-K5T46_RS00400	828	-	41	17.3808	20.9913
NZ_CP081489.1	3043777	3044383	gene-K5T46_RS14520	606	+	30	12.7176	20.9862
NZ_CP081489.1	3175723	3176653	gene-K5T46_RS15165	930	-	46	19.5004	20.9682
NZ_CP081489.1	1583023	1584298	gene-K5T46_RS07550	1275	-	63	26.7071	20.9467
NZ_CP081489.1	4202002	4203097	gene-K5T46_RS20230	1095	+	54	22.8918	20.9057
NZ_CP081489.1	2524837	2525689	gene-K5T46_RS12090	852	+	42	17.8047	20.8975
NZ_CP081489.1	1260904	1261615	gene-K5T46_RS06010	711	-	35	14.8373	20.8681
NZ_CP081489.1	1430711	1431545	gene-K5T46_RS06825	834	-	41	17.3808	20.8403
NZ_CP081489.1	3182488	3183079	gene-K5T46_RS15200	591	+	29	12.2937	20.8016
NZ_CP081489.1	3948923	3949514	gene-K5T46_RS18975	591	+	29	12.2937	20.8016
NZ_CP081489.1	3283146	3283941	gene-K5T46_RS15660	795	-	39	16.5329	20.7962
NZ_CP081489.1	3767035	3767830	gene-K5T46_RS17990	795	+	39	16.5329	20.7962
NZ_CP081489.1	607978	609304	gene-K5T46_RS02880	1326	+	65	27.5549	20.7805
NZ_CP081489.1	2218841	2219045	gene-K5T46_RS10545	204	-	10	4.23922	20.7805
NZ_CP081489.1	1186954	1187404	gene-K5T46_RS05660	450	-	22	9.32627	20.7251
NZ_CP081489.1	1591048	1596010	gene-K5T46_RS07580	4962	-	242	102.589	20.6749
NZ_CP081489.1	2465757	2466681	gene-K5T46_RS11795	924	+	45	19.0765	20.6455
NZ_CP081489.1	398641	399463	gene-K5T46_RS01850	822	+	40	16.9569	20.6288
NZ_CP081489.1	2168814	2169780	gene-K5T46_RS10280	966	-	47	19.9243	20.6256
NZ_CP081489.1	4455319	4456285	gene-K5T46_RS21565	966	+	47	19.9243	20.6256
NZ_CP081489.1	2125567	2126698	gene-K5T46_RS10065	1131	-	55	23.3157	20.6151
NZ_CP081489.1	1485795	1487523	gene-K5T46_RS07090	1728	+	84	35.6094	20.6073
NZ_CP081489.1	2387502	2387646	gene-K5T46_RS11400	144	+	7	2.96745	20.6073
NZ_CP081489.1	3883335	3883953	gene-K5T46_RS18670	618	+	30	12.7176	20.5787
NZ_CP081489.1	664350	664680	gene-K5T46_RS03155	330	+	16	6.78274	20.5538
NZ_CP081489.1	2729204	2729534	gene-K5T46_RS13070	330	+	16	6.78274	20.5538
NZ_CP081489.1	1333333	1334200	gene-K5T46_RS06390	867	+	42	17.8047	20.536
NZ_CP081489.1	4338476	4338662	gene-K5T46_RS20935	186	+	9	3.81529	20.5123
NZ_CP081489.1	2446732	2447890	gene-K5T46_RS11695	1158	-	56	23.7396	20.5005
NZ_CP081489.1	3200268	3201426	gene-K5T46_RS15270	1158	-	56	23.7396	20.5005
NZ_CP081489.1	1168099	1168306	gene-K5T46_RS05570	207	-	10	4.23922	20.4793
NZ_CP081489.1	2634669	2635332	gene-K5T46_RS12640	663	-	32	13.5655	20.4608
NZ_CP081489.1	73147	75406	gene-K5T46_RS00335	2259	-	109	46.2074	20.4548
NZ_CP081489.1	2235709	2237059	gene-K5T46_RS10605	1350	+	65	27.5549	20.411
NZ_CP081489.1	3914633	3915548	gene-K5T46_RS18820	915	-	44	18.6525	20.3853
NZ_CP081489.1	4196703	4197162	gene-K5T46_RS20195	459	-	22	9.32627	20.3187
NZ_CP081489.1	2213037	2213976	gene-K5T46_RS10515	939	-	45	19.0765	20.3157
NZ_CP081489.1	916232	917234	gene-K5T46_RS04385	1002	-	48	20.3482	20.3076
NZ_CP081489.1	3398638	3400435	gene-K5T46_RS16215	1797	+	86	36.4573	20.2878
NZ_CP081489.1	476333	476960	gene-K5T46_RS02230	627	-	30	12.7176	20.2833
NZ_CP081489.1	3663953	3664937	gene-K5T46_RS17545	984	-	47	19.9243	20.2483
NZ_CP081489.1	2589665	2590712	gene-K5T46_RS12425	1047	+	50	21.1961	20.2446
NZ_CP081489.1	53583	54570	gene-K5T46_RS00240	987	-	47	19.9243	20.1867
NZ_CP081489.1	1273748	1273832	gene-K5T46_RS06075	84	+	4	1.69569	20.1867
NZ_CP081489.1	1921455	1921728	gene-K5T46_RS09130	273	+	13	5.51098	20.1867
NZ_CP081489.1	2050117	2050663	gene-K5T46_RS09680	546	-	26	11.022	20.1867
NZ_CP081489.1	2215564	2215837	gene-K5T46_RS10530	273	-	13	5.51098	20.1867
NZ_CP081489.1	2565063	2565399	gene-K5T46_RS12290	336	+	16	6.78274	20.1867
NZ_CP081489.1	3400427	3401078	gene-K5T46_RS16220	651	+	31	13.1416	20.1867
NZ_CP081489.1	4406042	4407116	gene-K5T46_RS21330	1074	-	51	21.62	20.1304
NZ_CP081489.1	1477659	1478586	gene-K5T46_RS07050	927	-	44	18.6525	20.1214
NZ_CP081489.1	2872596	2873418	gene-K5T46_RS13675	822	+	39	16.5329	20.1131
NZ_CP081489.1	2458416	2459535	gene-K5T46_RS11750	1119	-	53	22.4678	20.0785
NZ_CP081489.1	3981668	3984287	gene-K5T46_RS19110	2619	-	124	52.5663	20.0711
NZ_CP081489.1	4061004	4062231	gene-K5T46_RS19485	1227	+	58	24.5875	20.0387
NZ_CP081489.1	1352272	1352463	id-NZ_CP081489.1:1352273..1352463	191	-	9	3.81529	19.9754
NZ_CP081489.1	2419364	2419832	gene-K5T46_RS11535	468	-	22	9.32627	19.9279
NZ_CP081489.1	3341759	3343079	gene-K5T46_RS15940	1320	-	62	26.2831	19.9115
NZ_CP081489.1	1185575	1186853	gene-K5T46_RS05655	1278	+	60	25.4353	19.9024
NZ_CP081489.1	1200486	1201125	gene-K5T46_RS05750	639	-	30	12.7176	19.9024
NZ_CP081489.1	609768	610557	gene-K5T46_RS02890	789	-	37	15.6851	19.8797
NZ_CP081489.1	156633	157017	gene-K5T46_RS00725	384	+	18	7.63059	19.8713
NZ_CP081489.1	2155681	2157025	gene-K5T46_RS10220	1344	+	63	26.7071	19.8713
NZ_CP081489.1	3406450	3406834	gene-K5T46_RS16255	384	-	18	7.63059	19.8713
NZ_CP081489.1	4025447	4025831	gene-K5T46_RS19305	384	-	18	7.63059	19.8713
NZ_CP081489.1	1356439	1357357	gene-K5T46_RS06495	918	-	43	18.2286	19.8569
NZ_CP081489.1	2328999	2330985	gene-K5T46_RS11120	1986	+	93	39.4247	19.8513
NZ_CP081489.1	1900802	1902383	gene-K5T46_RS09045	1581	-	74	31.3702	19.842
NZ_CP081489.1	364529	365021	gene-K5T46_RS01715	492	-	23	9.7502	19.8175
NZ_CP081489.1	3284973	3287220	gene-K5T46_RS15670	2247	-	105	44.5118	19.8094
NZ_CP081489.1	1072709	1073180	gene-K5T46_RS05120	471	-	22	9.32627	19.801
NZ_CP081489.1	1544209	1544680	gene-K5T46_RS07370	471	+	22	9.32627	19.801
NZ_CP081489.1	3617809	3619507	gene-K5T46_RS17310	1698	+	79	33.4898	19.7231
NZ_CP081489.1	308673	309600	gene-K5T46_RS01475	927	-	43	18.2286	19.6641
NZ_CP081489.1	2917873	2918803	gene-K5T46_RS13960	930	+	43	18.2286	19.6007
NZ_CP081489.1	4211936	4212911	gene-K5T46_RS20270	975	+	45	19.0765	19.5656
NZ_CP081489.1	3518651	3519323	gene-K5T46_RS16835	672	-	31	13.1416	19.5559
NZ_CP081489.1	496313	497072	gene-K5T46_RS02330	759	+	35	14.8373	19.5484
NZ_CP081489.1	1315727	1316291	gene-K5T46_RS06285	564	+	26	11.022	19.5425
NZ_CP081489.1	4275433	4275802	gene-K5T46_RS20600	369	-	17	7.20667	19.5303
NZ_CP081489.1	1917679	1919329	gene-K5T46_RS09120	1650	-	76	32.218	19.5261
NZ_CP081489.1	4327349	4327871	gene-K5T46_RS20835	522	-	24	10.1741	19.4906
NZ_CP081489.1	1841228	1842164	gene-K5T46_RS08790	936	+	43	18.2286	19.475
NZ_CP081489.1	492759	493913	gene-K5T46_RS02315	1154	+	53	22.4678	19.4695
NZ_CP081489.1	1718204	1718444	gene-K5T46_RS08145	240	+	11	4.66314	19.4297
NZ_CP081489.1	2185497	2186130	gene-K5T46_RS10395	633	+	29	12.2937	19.4214
NZ_CP081489.1	3433877	3434927	gene-K5T46_RS16440	1050	+	48	20.3482	19.3793
NZ_CP081489.1	2063306	2064947	gene-K5T46_RS09745	1641	-	75	31.7941	19.3748
NZ_CP081489.1	4454294	4455323	gene-K5T46_RS21560	1029	+	47	19.9243	19.3628
NZ_CP081489.1	1479670	1479889	gene-K5T46_RS07060	219	-	10	4.23922	19.3571
NZ_CP081489.1	2568502	2568721	gene-K5T46_RS12300	219	-	10	4.23922	19.3571
NZ_CP081489.1	1047558	1048896	gene-K5T46_RS05010	1338	-	61	25.8592	19.3268
NZ_CP081489.1	2930887	2931655	gene-K5T46_RS14005	768	-	35	14.8373	19.3193
NZ_CP081489.1	3866594	3867011	gene-K5T46_RS18585	417	+	19	8.05451	19.3154
NZ_CP081489.1	1503747	1504647	gene-K5T46_RS07185	900	+	41	17.3808	19.312
NZ_CP081489.1	3213251	3213734	gene-K5T46_RS15320	483	-	22	9.32627	19.3091
NZ_CP081489.1	4042912	4043395	gene-K5T46_RS19395	483	+	22	9.32627	19.3091
NZ_CP081489.1	1160018	1163798	gene-K5T46_RS05550	3780	-	172	72.9145	19.2896
NZ_CP081489.1	1265281	1265941	gene-K5T46_RS06040	660	-	30	12.7176	19.2692
NZ_CP081489.1	1968627	1970343	gene-K5T46_RS09295	1716	+	78	33.0659	19.2692
NZ_CP081489.1	3301283	3301481	gene-K5T46_RS15735	198	-	9	3.81529	19.2692
NZ_CP081489.1	1070607	1072149	gene-K5T46_RS05110	1542	-	70	29.6745	19.2442
NZ_CP081489.1	2011837	2012410	gene-K5T46_RS09490	573	+	26	11.022	19.2355
NZ_CP081489.1	1266460	1267894	gene-K5T46_RS06050	1434	+	65	27.5549	19.2154
NZ_CP081489.1	112771	113389	gene-K5T46_RS00535	618	+	28	11.8698	19.2068
NZ_CP081489.1	1940701	1942735	gene-K5T46_RS09200	2034	+	92	39.0008	19.1744
NZ_CP081489.1	1041016	1042432	gene-K5T46_RS04980	1416	+	64	27.131	19.1603
NZ_CP081489.1	3296423	3297686	gene-K5T46_RS15715	1263	-	57	24.1635	19.1319
[truncated: 2,400 more rows]
