# Supplementary material for: Structural basis for sequence-specific recognition of guide and target strands by the Archaeoglobus fulgidus Argonaute protein
Source: Research Square preprint supplement (doi:10.21203/rs.3.rs-2305454/v1), 2022-11-26
Supplement: Supplementary file 2 [file dc16a2d3640ecc8fde72bb9d.xlsx]

## Sheet: structures
	1288	1289	C10B	B5B	C10A	B5A			RS	PQ
	6t5t	6tuo	6xup, B	6xu0, B	6xup, A	6xu0, A	2w42	1ytu	2bgg, B	2bgg, A
	gA1	gA1	gA1	gA1	gA1	gA1	gT1	gA1 (RNA)	gU1 (RNA)	gU1 (RNA)
g1	OP1–2.64--Y123 OH	OP1–2.72--Y123 OH	OP1–2.63—Y123 OH	OP1–2.65—Y123 OH	OP1–2.53--Y123 OH	OP1–2.67--Y123 OH	OP1–2.43--Y123 OH	OP1–2.64—Y123 OH	OP1–2.49--Y123 OH	OP1–2.39--Y123 OH
backbone	OP1+-3.01+-K127 NZ	OP1+-2.58+-K127 NZ	OP1+-2.66+-K127 NZ	OP1+-3.24+-K127 NZ	OP2+-2.55+-K127 NZ	OP1+-3.19+-K127 NZ	OP2+-2.80+-K127 NZ	OP1+-3.11+-K127 NZ	OP1+-2.81+-K127 NZ	OP2+-2.70+-K127 NZ
	OP2...3.81...S136 O	OP2...3.77...S136 O	OP2...3.85...S136 O	OP2...3.77...S136 O	OP2...3.71...S136 O	OP2...3.70...S136 O	OP2...3.84...S136 O	OP2...3.62...S136 O	OP2...3.80...S136 O	--
	OP3–3.10--Q137 NE2	OP3–2.96--Q137 NE2	OP3–2.86—Q137 NE2	OP3–2.77—Q137 NE2	OP3–3.01--Q137 NE2	OP3–3.02--Q137 NE2	OP3–3.03--Q137 NE2	OP3—2.98—Q137 NE2	OP3–3.19--Q137 NE2	OP3–3.02--Q137 NE2
	OP2–2.92--F138 N	OP2–2.90--F138 N	OP2–2.81—F138 N	OP2–2.79—F138 N	OP2–2.74--F138 N	OP2–2.84--F138 N	OP2–2.87--F138 N	OP2–2.75--F138 N	OP2–2.89--F138 N	OP2–2.90--F138 N
	O3'...3.74...M139 CA	O3'...3.67...M139 CA	O3'...3.85...M139 CA	O3'...3.74...M139 CA	O3'...3.67...M139 CA	O3'...3.66...M139 CA	O3'...3.72...M139 CA	O3'...3.58...M139 CA	O3'...3.93...M139 CA	O3'...3.73...M139 CA
	O3'...3.72...R140 N	O3'...3.71...R140 N	O3'...3.75...R140 N	O3'...3.78...R140 N	O3'...3.83...R140 N	O3'...3.86...R140 N	O3'...3.84...R140 N	O3'...3.65...R140 N	O3'...3.84...R140 N	O2'—3.75--R140 NH1
	OP3+-3.01+-K163 NZ	OP3+-2.89+-K163 NZ	OP2+-3.16+-K163 NZ	OP3+-2.98+-K163 NZ	OP3+-3.03+-K163 NZ	OP3+-3.03+-K163 NZ	OP2+-3.03+-K163 NZ	OP3+-2.93+-K163 NZ	OP2+-3.30+-K163 NZ	OP3+-3.17+-K163 NZ
	OP3::2.08::MG	OP3::2.05::MG	OP3::1.84::MG	OP3::2.03::MG	OP1::3.48::MG	OP3::1.94::MG	OP3::1.98::MN	OP3::2.04::MG	OP3::2.02::MN	OP3::2.12::MN
g1	--	--	--	--	--	--	O2...4.00...L115 CD1	--	--	O2...3.78...L115 CD1
base	C2...3.53...E117 O	C2...3.65...E117 O	C2...3.90...E117 O	--	N3-2.58-w-2.86-E117 O	N3-2.70-w-2.89-E117 O	O2....3.96...E117 O	C2..3.93...E117 O	--	--
	N6...3.34...Y118 CE1	N6...3.74...Y118 CE1	N6...3.45...Y118 CE1	C2...3.68...Y118 CA	N6=3.30=Y118 OH	N6=3.20=Y118 OH	N3=3.54=Y118 CZ	C6...3.53...Y118 CE1	O2...3.80...Y118 O	--
	N1–2.92--N119 N	N1–3.01--N119 N	N1–3.13—N119 N	N1–3.28—N119 N	C2...3.89...N119 O	C2...3.99...N119 O	O2–3.77--N119 N	N1–3.14--N119 N	--	--
	N6–3.14--T120 OG1	N6–3.09--T120 OG1	N6–2.88--T120 OG1	N6–2.76--T120 OG1	N1–2.97--T120 OG1	N1–2.74--T120 OG1	O4...3.61...T120 OG1	N6–2.94--T120 OG1	O4...3.78...T120 CG2	O4...3.94..T120 CG2
	N7=3.29=Y123 CE2	N7=3.35=Y123 CE2	N7=3.64=Y1223 CE2	N7=3.51=Y123 CE2	N7=3.59=Y123 CE2	N7=3.47=Y123 CE2	N1=3.43=Y123 CD2	N9=3.35=Y123 CE1	C5=3.46=Y123 CE2	N1=3.60=Y123 CD1
	N7-2.62-w-3.09-Y124 OH	N7-2.66-w-3.24 Y124 OH	N7-2.37-w-3.51-Y124 OH	N7-2.55-w-3.63-Y124 OH	N6...3.65...Y124 CE2	N6...3.67...Y124 CE2	C7...3.25...Y124 OH	no water	O4...3.75...Y124 CE2	O4...3.68...Y124 CE2
	N3...3.20...R140 CD	N3...3.43...R140 CD	N3...3.48...R140 CD	--	--	--	O2...3.89...R140 CG	N3...3.55...R140 CD	O2...3.21...R140 CD	O2–3.29--R140 NH1
	gT2	gT2	gT2	gT2	gT2	gT2	gT2	gG2 (RNA)	gU2 (RNA)	gU2 (RNA)
g2	--	O3'—3.94—Q137 NE2	--	O3'—3.94—Q137 NE2	--	O3'—3.85—Q137 NE2	--	--	--	--
backbone	C5'…3.64...F138 O	C5'…3.67...F138 O	C5'...3.81...F138 O	C5'...3.76...F138 O	C5'…3.66...F138 O	C5'…3.69...F138 O	C5'...3.56...F138 O	C5'…3.87...F138 O	C5'...3.65...F138 O	C5'...3.43...F138 O
	OP2...3.63...M139 CA	OP2...3.64...M139 CA	OP2...3.63...M139 CA	OP2...3.55...M139 CA	OP2...3.58...M139 CA	OP2...3.53...M139 CA	OP2...3.48...M139 CA	OP2...3.60...M139 CA	OP2...3.45...M139 CA	OP2...3.67...M139 CA
	OP2—2.85—R140 N	OP2—2.96—R140 N	OP2—2.88—R140 N	OP2—2.90—R140 N	OP2—2.90—R140 N	OP2—2.85—R140 N	OP2–2.82--R140 N	OP2–2.96—R140 N	OP2–2.86--R140 N	OP2–2.97--R140 N
	--	--	OP1...3.56...I143 CD1	OP1...2.94...I143 CD1	OP2...3.55...I143 CG2	OP2...3.58...I143 CG2	OP2...3.51...I143 CG2	OP1...3.74...I143 CG2	OP1...3.28...I143 CG2	OP1...3.71...I143 CD1
	OP2–2.71—Y152 OH	OP2–2.55—Y152 OH	OP2–2.59—Y152 OH	OP2–2.43—Y152 OH	OP2–2.47—Y152 OH	OP2–2.66—Y152 OH	OP2–2.61--Y152 OH	OP2–2.26--Y152 OH	OP2–2.57--Y152 OH	OP2–2.58--Y152 OH
	--	--	--	--	--	--	--	O2'...3.70...N155 C	O2'...3.91...N155 O	O2'...3.55...N155 C
	C4'...3.60...L156 CD1	C4'...3.65...L156 CD1	--	O4'...3.96...L156 CB	O4'...3.99...L156 CB	O4'...3.84...L156 CB	C4'...3.39...L156 CD1	O2'....3.63...L156 CA	O4'...3.64...L156 CB	O2'...3.39...L156 N
	O3'—3.34—Q159 NE2	O3'—3.37—Q159 NE2	O3'—3.13—Q159 NE2	O3'—3.35—Q159 NE2	O3'—3.27—Q159 NE2	O3'—3.37—Q159 NE2	O3'—2.98--Q159 NE2	O2'—3.50—Q159 NE2	O3'—3.11--Q159 NE2	O2'—3.44--Q159 NE2
	--	--	--	--	--	--	--	O2'...3.82...R380 O	--	--
g2	C7...3.33...I143 CG2	C7...3.50...I143 CG2	C7...3.40...I143 CG2	C7...3.33...I143 CD1	C7...3.65...I143 CG2	C7...3.79...I143 CG1	C7...3.69...I143 CG1	N7...3.89...I143 CG2	C5...3.75...I143 CG2	C5...3.99...I143 CG2
base	O4–2.99—R147 NE	O4–3.05—R147 NE	O4–2.88—R147 NE	O4–3.69—R147 NE	--	--	--	O6–2.91--R147 NE	O4–3.20--R147 NE	--
	O2...3.92...F151 O	O2...3.96...F151 O	O2...3.73...F151 O	O2...3.91...F151 O	O2–3.43—F151 O	O2–3.61—F151 O	--	N2–3.77--F151 O	O2...3.96...F151 O	O2...3.70...F151 O
	C6...3.51...Y152 CD2	C6...3.49...Y152 CD2	C6...3.33...Y152 CD1	C6...3.32...Y152 CE1	C6...3.19...Y152 CD2	C6...3.23...Y152 CD2	C6...3.49...Y152 CD1	C8...3.41...Y152 CE2	C6...3.26...Y152 CD2	C5...3.29...Y152 CD2
	O2–3.58—N155 ND2	O2–3.60—N155 ND2	O2–3.58—N155 ND2	O2–3.30—N155 ND2	O2–3.29—N155 ND2	O2–3.44—N155 ND2	O2--2.99--N155 OD1	N2–3.18--N155 ND2	O2–2.86--N155 ND2	O2–2.94--N155 ND2
	--	O2-2.86-w-3.35-R383 NH2	--	--	--	--	--	--	--	--
	gT3	gT3	gC3	gC3	gC3	gC3	gC3	gA3 (RNA)	gC3 (RNA)	gC3 (RNA)
g3	--	--	--	--	--	--	O4'—3.90--N155 OD1	O2'—3.78--N155 OD1	--	--
backbone	OP1–3.03—Q159 NE2	OP1–2.91—Q159 NE2	OP1–3.00—Q159 NE2	OP1–2.95—Q159 NE2	OP1–2.53—Q159 NE2	OP1–2.94—Q159 NE2	OP1–2.94--Q159 NE2	OP1—3.01—Q159 OE1	OP1–3.23--Q159 NE2	OP1–3.24--Q159 NE2
	O3'-3.49-w-3.24-N378 ND2	--	--	--	--	--	--	--	--	--
	OP1–3.63—R380 NH2	OP1–3.48—R380 NH2	OP1–3.02—R380 NH1	OP1–3.21—R380 NH2	OP1–2.77—R380 NH1	OP1–3.23—R380 NH2	OP1–3.44--R380 NH2	OP1–3.47--R380 NH2	OP1–3.65--R380 NH2	OP1–3.60--R380 NH2
	OP1–3.17—L427 O	OP1–3.06—L427 O	OP1–3.39—L427 OXT	OP1–3.28—L427 O	OP1–3.38—L427 OXT	OP1–3.26—L427 O	OP1–3.32--L427 OXT	OP1–3.29--L427 O	OP1–3.62--L427 OXT	OP1–3.20--L427 OXT
	OP1::1.92::MG	OP1::1.88::MG	OP1::2.11::MG	OP1::2.13::MG	OP1::2.27::MG	OP1::2.05::MG	OP1::2.10::MN	OP1::1.94::MG	OP1::2.11::MN	OP1::1.98::MN
g3	O4–2.90—R147 NH2	O4–2.77—R147 NH2	N4–3.75—R147 NH2	O4–3.98—R147 NH1	--	--	--	--	N4...3.92...R147 NH2	--
base	O2-2.59-w-2.24-R383 NH2	O2—2.62—R383 NH2	--	--	--	--	--	--	--	--
	gG4	gG4	gG4	gG4	gG4	gG4	gG4	gC4 (RNA)	gG4 (RNA)	gG4 (RNA)
g4	--	OP2-2.32-w-2.97-N378 ND2	--	--	OP1–3.91—N378 ND2	OP2–2.21-w-2.75-N378 ND2	OP1–2.78--N378 ND2	OP1–3.27--N378 ND2	--	--
backbone	OP1–3.21—R380 NH1	OP1–3.34—R380 NH1	OP1–2.78—R380 NH2	OP2–2.57—R380 NH1	OP2–3.11—R380 NH2	OP2–3.30—R380 NH1	OP2–2.90--R380 NH1	OP2–2.68--R380 NH1	OP1–3.73--R380 NH1	OP1–3.37--R380 NH1
	--	O4'—3.65—R383 NH2	--	--	--	--	--	C5'...3.44...R383 O	O2'—3.60--R383 NH2	--
	--	--	OP1...3.89...S384 CA	--	--	--	--	--	--	--
	--	OP1...3.71...R385 CD	OP1–3.41—R385 N	OP1...3.45...R385 CD	OP1...3.64...R385 CD	OP2–3.77—R385 NE	OP1...3.57...R385 CD	OP1...3.96...R385 CD	C5'...3.93...R385 NE	C5'...3.84...R385 CZ
	OP1-3.28-w-2.83-N392 OD1	OP1-2.98-w-2.91-N392 OD1	--	OP2-2.84-w-3.49-N392 OD1	--	OP2-2.80-w-2.74-N392 OD1	--	--	--	--
g4 base	--	--	--	--	--	--	--	O2–3.85--R383 NH1	--	--
	gT5	gT5	gT5	gT5	gT5	gT5	gA5	gA5 (RNA)	gA5 (RNA)	gA5 (RNA)
g5	--	--	--	--	O3'—2.93—Q329 NE2	O3'—3.44—Q329 OE1	--	--	C5'...3.44...Q329 NE2	--
backbone	--	C5'...3.44...P330 O	unresolved	unresolved	--	OP1...3.04...P330 CG	--	--	--	--
	unresolved	O3'...3.97...Y331 CA	unresolved	unresolved	unresolved	unresolved	--	--	--	C5'...2.66...Y331 CE1
	unresolved	C2'...3.89...L332 N	unresolved	unresolved	unresolved	unresolved	--	--	--	--
	--	OP1-2.89-w-2.58-K344 NZ	OP2+-3.86+-K344 NZ	--	OP1+-3.50+-K344 NZ	--	--	--	--	--
	--	--	OP1–3.28—R385 NH1	--	OP1–2.74—R385 NH1	--	--	OP1–2.58--R385 NH1	OP1–3.51--R385 NH2	--
	--	--	--	--	--	--	--	OP1–2.81--N386 N	--	--
g5 base	--	--	--	--	--	--	--	--	--	--
	gG6	gA6	gG6	gG6	gG6	gG6	gC6	gG6 (RNA)	gC6 (RNA)	gC6 (RNA)
g6	--	--	OP1–3.14—W299 NE1	--	--	--	--	--	--	--
backbone	OP2—3.84—Q329 NE2	OP2–3.53—Q329 NE2	--	--	OP2–2.56—Q329 NE2	OP1–2.27—Q329 NE2	--	--	--	--
	unresolved	OP1...3.52...Y331 CB	unresolved	unresolved	unresolved	unresolved	--	--	--	OP1–2.86--Y331 OH
	unresolved	OP1–3.34—L332 N	unresolved	unresolved	unresolved	unresolved	--	--	--	--
	--	--	OP1...3.10...P342 CG	--	--	--	--	--	--	--
g6 base	--	--	--	--	--	--	--	--	--	--
							tT-2'	tU-2' (RNA)	tU-2' (RNA)	tU-2' (RNA)
t-2'								--	--	O2'—2.14--R383 NH2
backbone								--	--	C5'...2.89...S24 O
t-2'								--	--	O4...3.52...L328 CG
base								--	--	N3–2.89--Q329 O
								--	--	O2...2.95...P330 O
								--	--	O2...2.95...Y331 O
								--	--	O2–3.52--R383 NH2
							tT-1'	tU-1' (RNA)	tU-1' (RNA)	tU-1' (RNA)
t-1'								--	--	OP1–3.79--S24 O
backbone								--	--	OP1–3.86--N25 N
								--	--	OP1--2.91--T26 N
								--	--	OP2–3.82--R383 NH1
t-1' base								--	--	--
	tT1'	tT1'	tT1'	tT1'	tT1'	tT1'	tA1'	tU1' (RNA)	tA1' (RNA)	tA1' (RNA)
	--	--	--	--	--	--	--	--	--	O2'...2.62...N25 OD1
t1'	OP2-2.78-w-2.84-T26 N	OP2-2.74-w-2.87-T26 N	OP2-3.05-w-3.09-T26 N	no water	OP2-2.69-w-2.86-T26 N	OP1-2.69-w-2.81-T26 N	OP2-3.30-w-2.99-T26 N	--	--	O3'—3.35--T26 N
backbone	OP2...3.21...T26 OG1	OP2...3.21...T26 OG1	OP2...3.16...T26 OG1	OP1...3.66...T26 OG1	OP2...3.35...T26 OG1	OP1...3.36...T26 OG1	OP2...3.88...T26 OG1	--	--	--
	O4'—3.25—G27 N	O4'...3.25...G27 N	O4'—3.53—G27 N	O4'—3.56—G27 N	O4'...3.30...G27 N	O4'...3.40...G27 N	O3'—3.32—G27 N	--	--	O2'—3.08--G27 N
	--	--	--	--	--	--	--	--	--	O2'...3.89...E28 N
	C2'...3.95...F151 CE1	C2'...3.95...F151 CE1	C2'...3.83...F151 CE1	C2'...3.79...F151 CE1	--	C2'...3.99...F151 CE1	--	--	--	OP2...3.54...F151 CE1
	OP2...3.74...R383 CD	--	OP2+-3.62+-R383 NH2	OP2+-3.33+-R383 NH1	OP2–3.13—R383 NH2	OP2–2.85—R383 NH1	OP1–2.70--R383 NH1	--	--	--
t1'	C6...3.36...T26 CG2	C6...3.36...T26 CG2	C6...3.45...T26 CG2	C6...3.32...T26 CG2	C6...3.40...T26 CG2	C6...3.26...T26 CG2	N3...3.15...T26 CG2	--	--	--
base	--	--	--	--	--	--	--	--	--	--
	--	--	--	--	--	--	--	--	--	--
	C2...3.29...I30 CD1	N3...3.27...I30 CD1	C2...3.46...I30 CD1	C2...3.38...I30 CD1	C2...3.44...I30 CD1	C2...3.36...I30 CD1	C5...3.35...I30 CD1	--	--	--
	--	--	--	--	--	--	N6...3.10...T150 O	--	--	--
	N3=3.35=F151 CD1	N3=3.29=F151 CD1	N3=3.27=F151 CD1	N3=3.31=F151 CD1	C4=3.54=F151 CD1	C4=3.50=F151 CD1	C2=3.64=F151 CD1	--	--	--
	N3–2.87—D154 OD2	N3–2.71—D154 OD2	N3–2.64—D154 OD2	N3–3.44—D154 OD2	N3–2.72—D154 OD2	N3–2.79—D154 OD2	N6–2.59--D154 OD2	--	--	--
	O4–2.83—N155 ND2	O4—2.79—N155 ND2	O4–2.75—N155 ND2	O4–3.05—N155 ND2	O4–3.00—N155 ND2	O4–2.91—N155 ND2	--	--	--	--
	C7...3.58...R383 NH1	--	--	--	--	C7...3.85...R383 NH2	--	--	--	--
	tA2'	tA2'	tA2'	tA2'	tA2'	tA2'	tA2'	tC2' (RNA)	tA2' (RNA)	tA2' (RNA)
t2'	--	--	--	--	--	--	--	--	--	OP2–3.70-- R147 NH2
backbone	--	--	C2'...3.47...F151 CE2	C2'...3.60...F151 CE2	C2'...3.70...F151 CE1	C2'...3.99...F151 CE1	C2'...3.67...F151 CE1	C2'...3.30...F151 CE2	--	C2'...3.80...F151 CE1
	C1'...3.84...R383 NH1	--	O3'...3.49...R383 CD	--	O3'—3.53—R383 NH1	O3'—2.28—R383 NH2	--	O4'—2.67--R383 NH2	O4'--2.77--R383 NH1	O2'...3.94...R383 CD
t2'	N6...4.00...R147 CD	N6...3.92...R147 CD	N6...3.20...R147 NH1	N6...4.00...R147 CG	--	--	--	--	--	--
base	N6-2.98-w-2.90-N148 N	N6-3.03-w-2.86-N148 N	no water	no water	N6...3.49...N148 CG	N6...3.61...N148 CG	N6–3.29--N148 OD1	--	--	N7...3.65...N148 OD1
	N7=3.22=F151 CD2	N7=3.31=F151 CD2	N7=3.30=F151 CD2	N7=3.47=F151 CD2	C6=3.68=F151 CB	N7=3.69=F151 CD2	N7...3.42...F151 CD2	N1=3.83=F151 CD2	--	N7=3.40=F151 CD2
	C2...3.69...N155 ND2	C2...3.83...N155 ND2	C2...3.75...N155 ND2	C2...3.54...N155 ND2	C2...3.80...N155 ND2	C2...3.85...N155 ND2	--	--	--	C2...3.75...N155 ND2
	N3–2.95—R383 NH1	N3...3.69...R383 NH2	--	--	N3-3.07-w-2.83-R383 NH1	N3-2.93-w-3.33-R383 NE	--	--	N3...3.85...R383 NH1	--
	tA3'	tA3'	tG3'	tG3'	tG3'	tG3'	tG3'	tU3' (RNA)	tG3' (RNA)	tG3' (RNA)
t3'	--	--	--	--	--	--	OP1–2.74--R147 NH2	--	--	OP2–3.23--R147 NH2
backbone	--	--	--	--	--	--	--	C2'...3.30...F151 CE2	--	--
	--	--	--	--	--	--	--	--	--	--
t3'	N6...3.20...R147 NE	N6...3.22...R147 NE	O6–2.59—R147 NH1	O6–3.41—R147 NE	--	--	--	--	--	--
base	N3-2.82-w-3.67-R383 NH2	N3-2.74-w-3.37-R383 NH1	--	--	--	--	--	O2–2.89--R383 NH1	N2...2.74...R383 NH2	--
	tC4'	tC4'	tC4'	tC4'	tC4'	tC4'	tC4'	tG4' (RNA)	tC4' (RNA)	tC4' (RNA)
t4' backbone	--	--	--	--	--	--	--	--	--	--
t4' base	N4–3.54—R147 NH2	N4–3.24—R147 NH2	--	N4–3.56—R147 NH1	--	--	--	--	--	--

## Sheet: Mutations
	Legend:	clash
		da donor-acceptor conflict
		H-bond lost
		too far >4A
		Specific contacts
	6T5T	in silico mutation of bases
gA1	G mutated	A	T mutated	C mutated
	N2 clash E117 O (2.21)	C2...3.53...E117 O	O2 too far E117 O (4.54)	O2 too far E117 O (4.61)
	O6...3.31...Y118 CE1	N6...3.34...Y118 CE1	O4...3.59...Y118 CE1	N4...3.59...Y118 CE1
	N1 da N119 N (2.95)	N1–2.92--N119 N	N3 too far N119 N (4.75)	N3 too far N119 N (4.70)
	O6--3.16--T120 OG1	N6–3.14--T120 OG1	O4--3.77--T120 OG1	O4--3.78--T120 OG1
	N7=3.29=Y123 CE2	N7=3.29=Y123 CE2	C5=3.19=Y123 CE2	C5=3.20=Y123 CE2
	N7-2.62-w-3.09-Y124 OH	N7-2.62-w-3.09-Y124 OH	C7...3.48...Y124 OH	N4-2.59-w-3.09-Y124 OH
	N3...3.18...R140 CD	N3...3.20...R140 CD	O2...3.12...R140 CD	O2...3.14...R140 CD
gT2	G mutated	A mutated	T	C mutated
	N7 too far I143 CG2 (5.27)	N7 too far I143 CG2 (5.27)	C7...3.33...I143 CG2	C5 too far I143 CG2 (4.84)
	O6--3.84--R147 NE	N6 da R147 NE (3.74)	O4–2.99—R147 NE	N4 da R147 NE 3.03
	N2...3.61...F151 O	C2...3.70...F151 O	O2...3.92...F151 O	O2...3.92...F151 O
	C8...3.53...Y152 CD2	C8...3.53...Y152 CD2	C6...3.51...Y152 CD2	C5...3.51...Y152 CD2
	N2 clash N155 ND2 (1.98)	C2...3.10...N155 ND2	O2–3.58—N155 ND2	O2--3.58--N155 ND2
gT3	G mutated	A mutated	T	C mutated
	O6--3.30--R147 NE/NH2	N6 da R147 NE (3.21)	O4–2.90—R147 NH2	N6 da R147 NH2 (2.87)
	N3-2.72-w-2.24-R383 NH2	N3-2.76-w-2.24-R383 NH2	O2-2.59-w-2.24-R383 NH2	O2-2.60-w-2.24-R383 NH2
tT1'	G mutated	A mutated	T	C mutated
	C8...3.45...T26 CG2	C8...3.45...T26 CG2	C6...3.36...T26 CG2	C6...3.43...T26 CG2
	C4...3.29...I143 CD1	C4...3.29...I143 CD1	C2...3.29...I30 CD1	C2...3.28...I143 CD1
	C6=3.37=F151 CD1	C6=3.38=F151 CD1	N3=3.35=F151 CD1	N3=3.34=F151 CD1
	N1 clash D154 OD2 (1.05)	N1 clash D154 OD2 (0.98)	N3–2.87—D154 OD2	N3 da D154 OD2 (2.82)
	O6--3.31--N155 ND2	N6 da N155 ND2 (3.22)	O4–2.83—N155 ND2	N4 da N155 ND2 2.80)
	N7 too far R383 NH1 (5.46)	N7 too far R383 NH1 (5.46)	C7...3.58...R383 NH1	C5 too far R383 NH1 (5.05)
tA2'	G mutated	A	T mutated	C mutated
	O6 too far R147 CD (4.05)	N6...3.99...R147 CD	O4 too far R147 CD (4.49)	N4 too far R147 CD (5.00)
	O6-3.04-w-2.91-N148 N	N6-2.98-w-2.90-N148 N	O4-2.45-w-2.91-N148 N	N4-2.41-w-2.91-N148 N
	N7=3.22=F151 CD2	N7=3.22=F151 CD2	C5=3.18=CD2	C5=3.17=CD2
	C2...3.69...N155 ND2	C2...3.69...N155 ND2	O2 too far N155 ND2 (4.05)	O2 too far N155 ND2 (4.11)
	N3--2.95--R383 NH1	N3–2.95—R383 NH1	O2--2.78--R383 NH1	O2--2.79--R383 NH1
tA3'	G mutated	A	T mutated	C mutated
	O6...3.20...R147 NE	N6...3.18...R147 NE	O4....63...R147 NE	N4...3.62...R147 NE
	N2 da R383 NH2 (3.21)	N3-2.82-w-3.67-R383 NH2	O2-2.65-w-3.67-R383 NH2	O2-2.65-w-3.67-R383 NH2
